# Supplementary material for: Convenient and efficient synthesis of novel 11H-benzo[5,6][1,4]thiazino[3,4-a]isoindol-11-ones derived from 2-bromo-(2/3-substitutedphenyl)-1H-indene-1,3(2H)-diones
Source: Royal Society of Chemistry journal article supplement (doi:10.1039/c9ra02403d), 2019-01-01
Supplement: c9ra02403d1.pdf [file c9ra02403d1.pdf]

## Supplementary Data

for

### Convenient and efficient synthesis of novel 11*H*-benzo[5,6][1,4]thiazino[3,4-*a*]isoindol-11-ones derived from 2-bromo-(2/3-substitutedphenyl)-1*H*-indene-1,3(2*H*)-diones

Satbir Mor<sup>a\*</sup> and Suchita Sindhu<sup>a</sup>

<sup>a</sup>*Department of Chemistry, Guru Jambheshwar University of Science & Technology, Hisar-125001, Haryana, India*

*\*Corresponding author*

Prof. Satbir Mor  
Department of Chemistry,  
Guru Jambheshwar University of Science & Technology,  
Hisar-125001, Haryana, India  
E-mail: satbir\_mor@yahoo.co.in  
Phone No. +91-1662-263397  
Fax No. +91-1662-276240

NMR (<sup>1</sup>H and <sup>13</sup>C) spectra of **5a-r** and 2D-NMR of **5b**

#### Contents

|                                                                     |     |
|---------------------------------------------------------------------|-----|
| <sup>1</sup> H and <sup>13</sup> C NMR Spectra of <b>5a-r</b> ..... | S2  |
| 2D-NMR spectra of <b>5b</b> .....                                   | S75 |
| HRMS Spectra of <b>5a-r</b> .....                                   | S80 |
| Crystal data of <b>5b</b> .....                                     | S98 |

$^1\text{H}$  and  $^{13}\text{C}$  NMR of **5a-r**

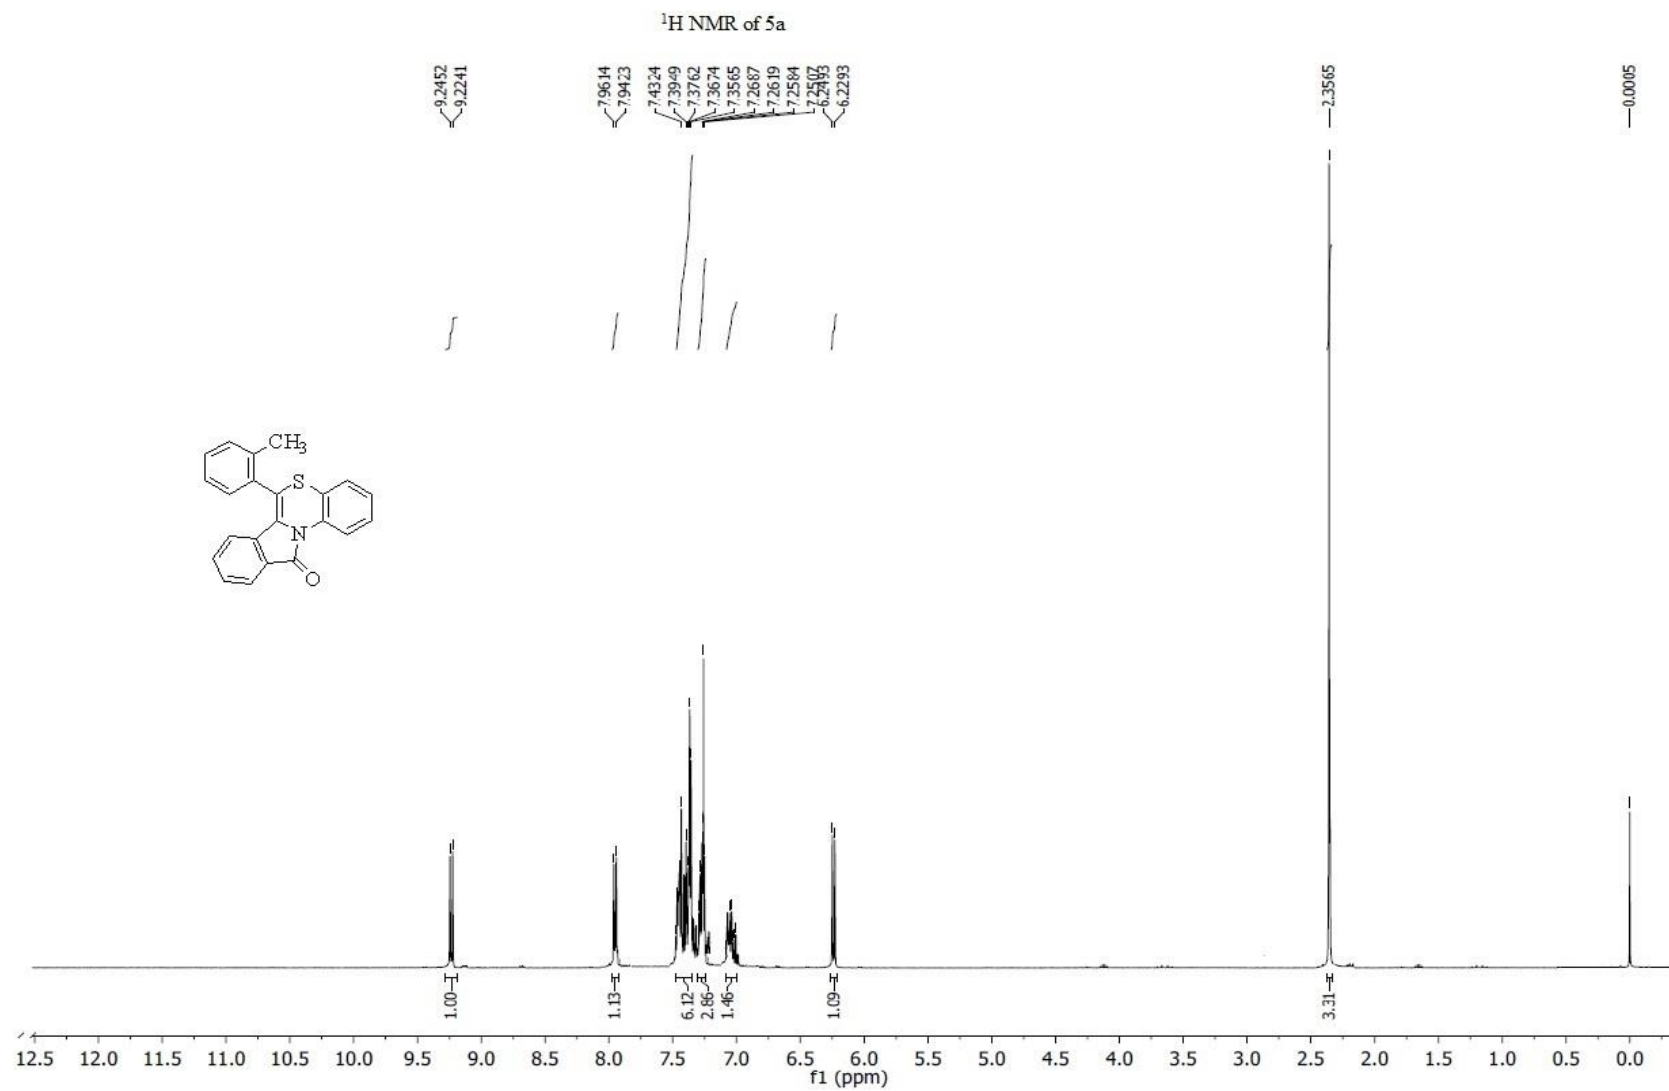

<sup>1</sup>H NMR of 5a

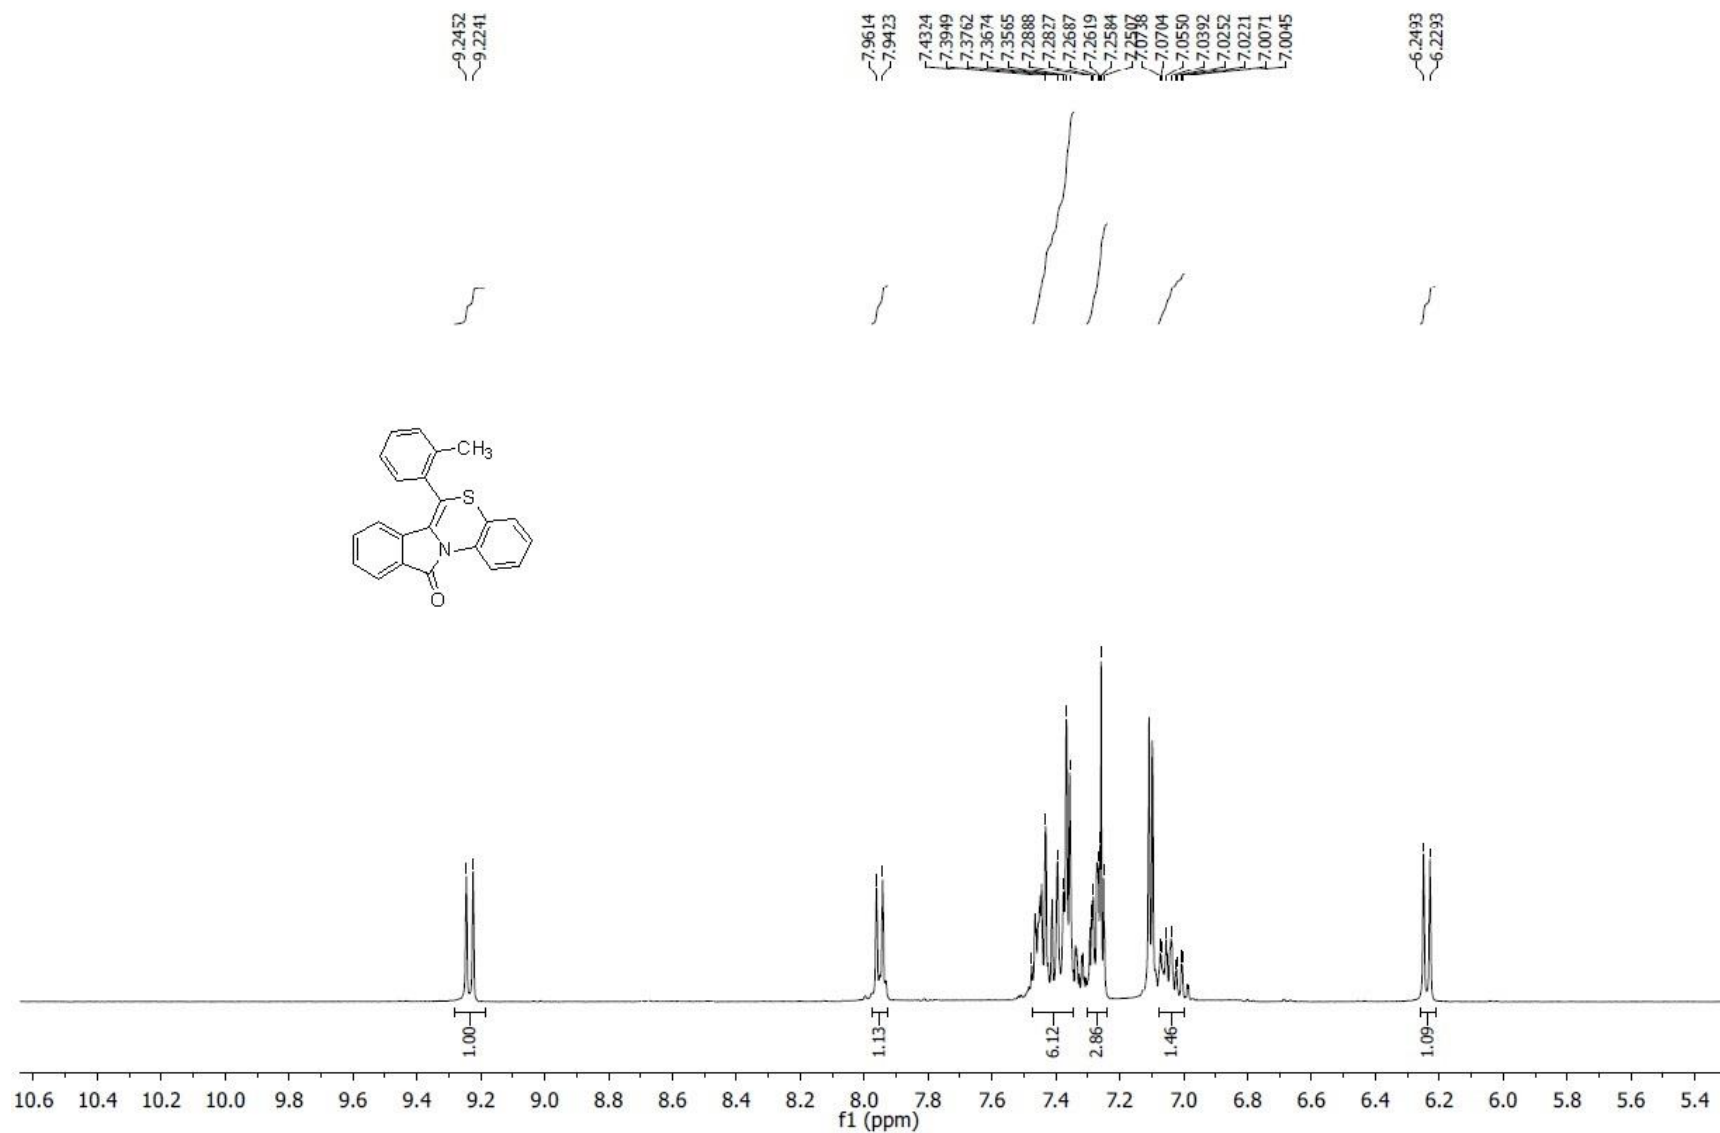

<sup>13</sup>C NMR of 5a

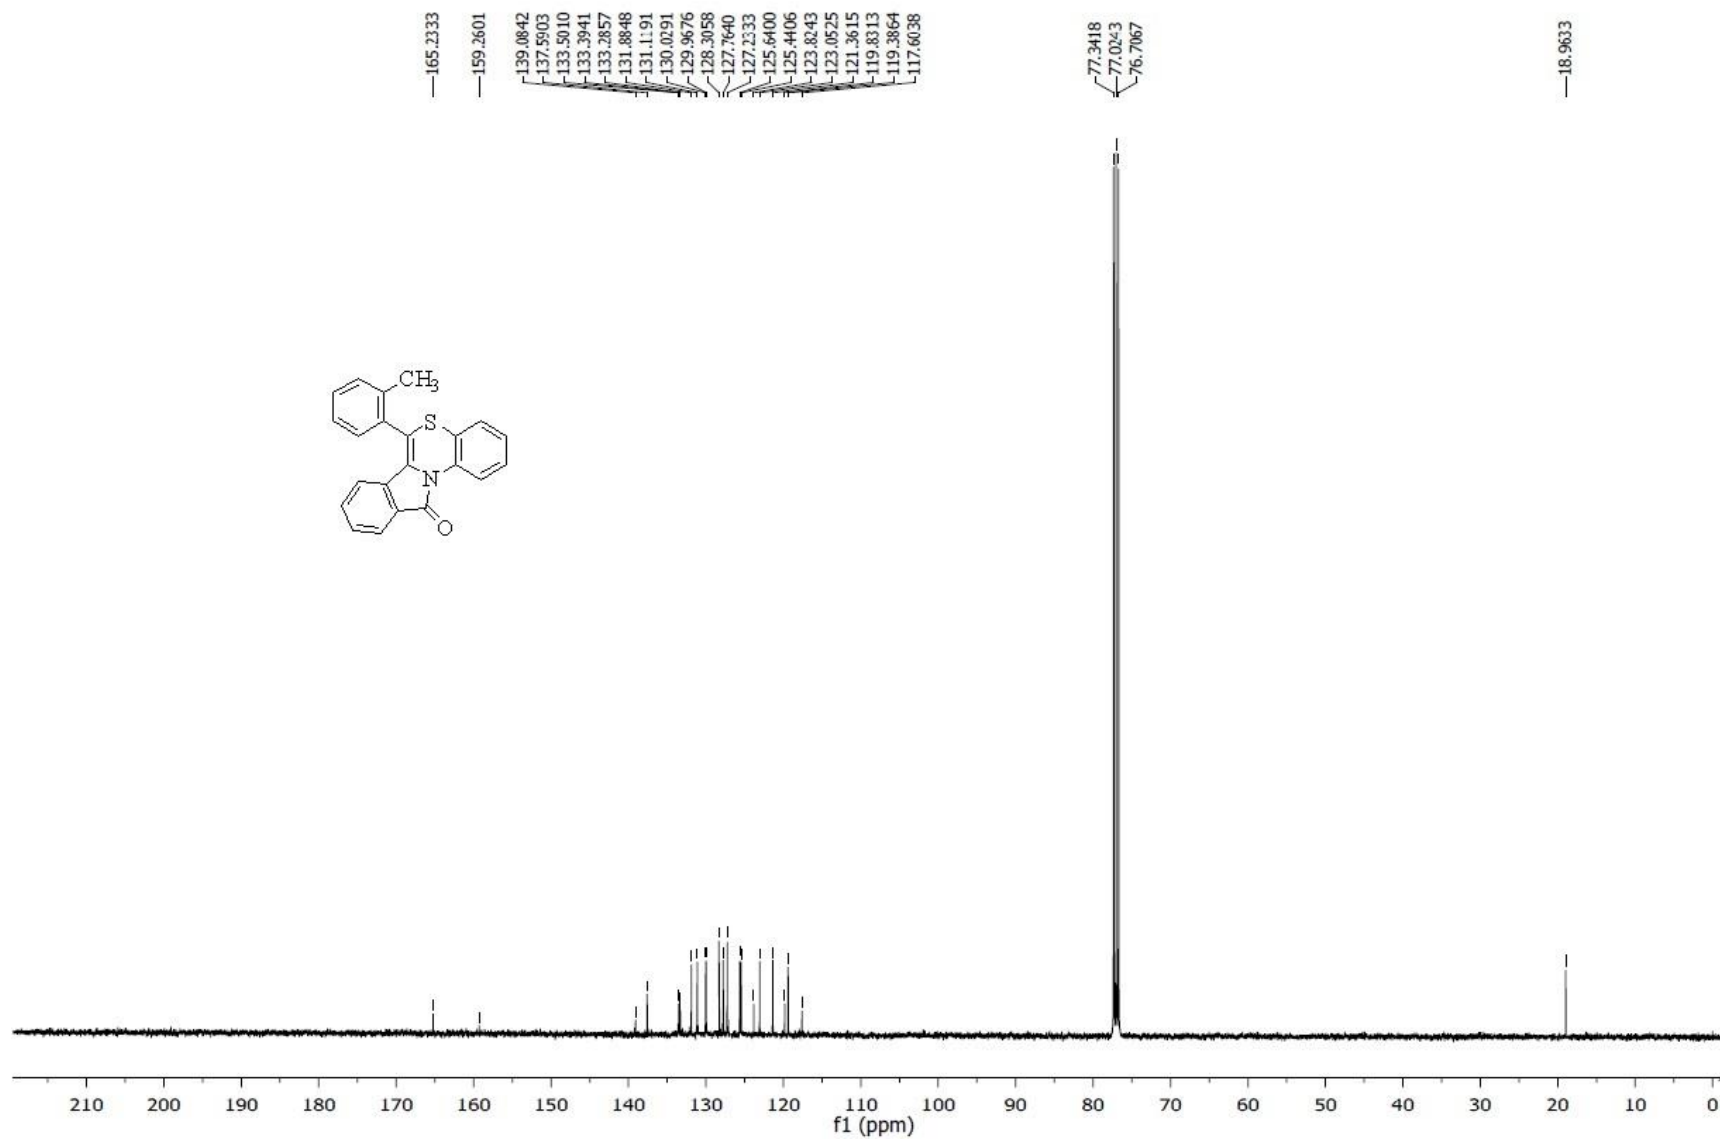

<sup>13</sup>C NMR of 5a

—165.2333

—159.2601

—139.0842

—137.5903

—133.5010

—133.3941

—133.2857

—131.8848

—131.1151

—130.0261

—129.9676

—128.3058

—127.7640

—127.2333

—125.6400

—125.4406

—123.8243

—123.0525

—121.3615

—119.8313

—119.3864

—117.6038

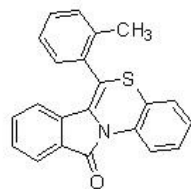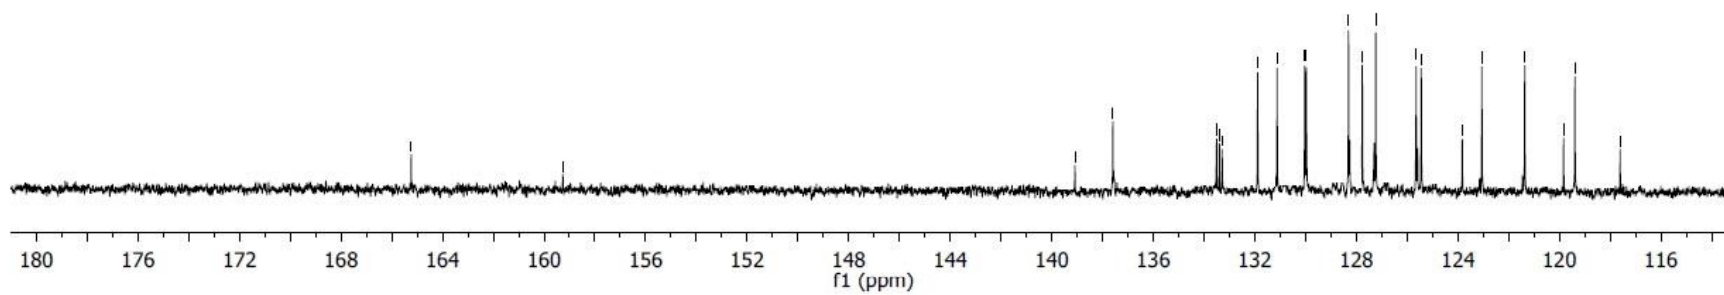

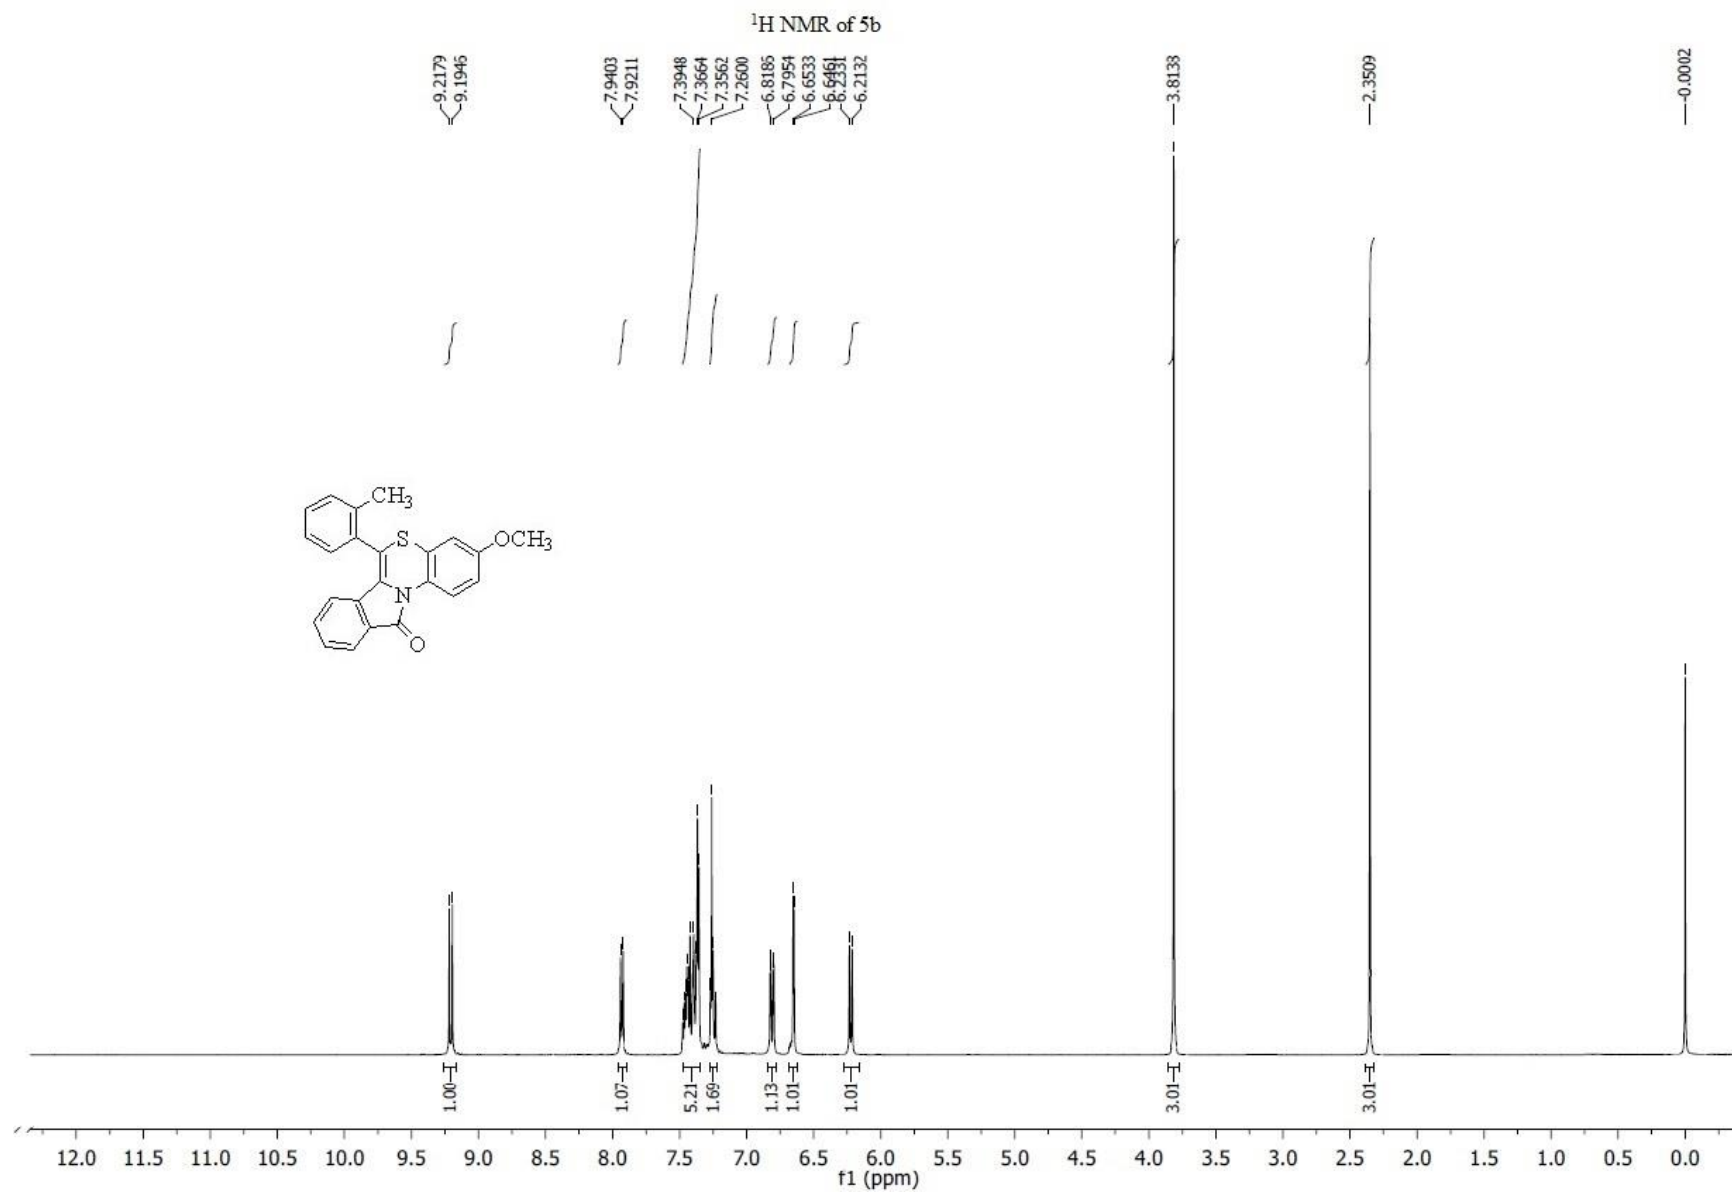

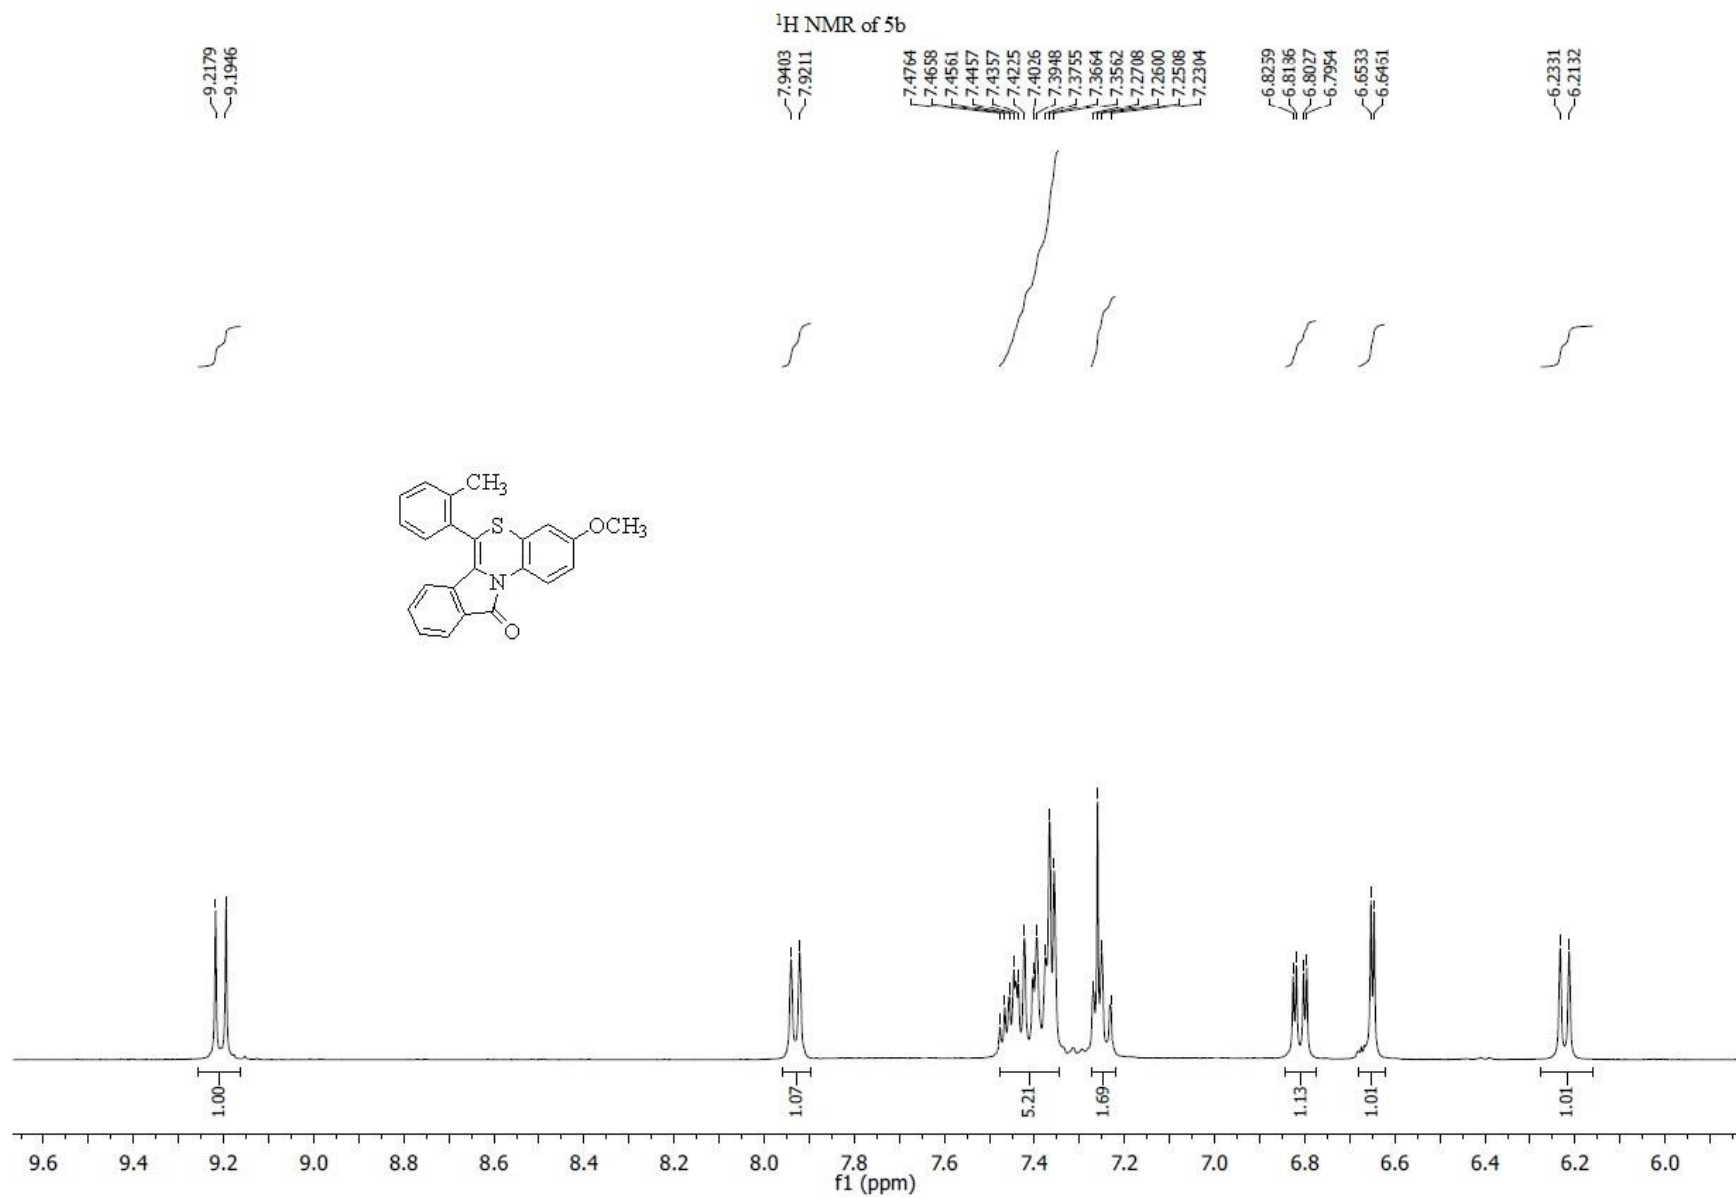

<sup>13</sup>C NMR of 5b

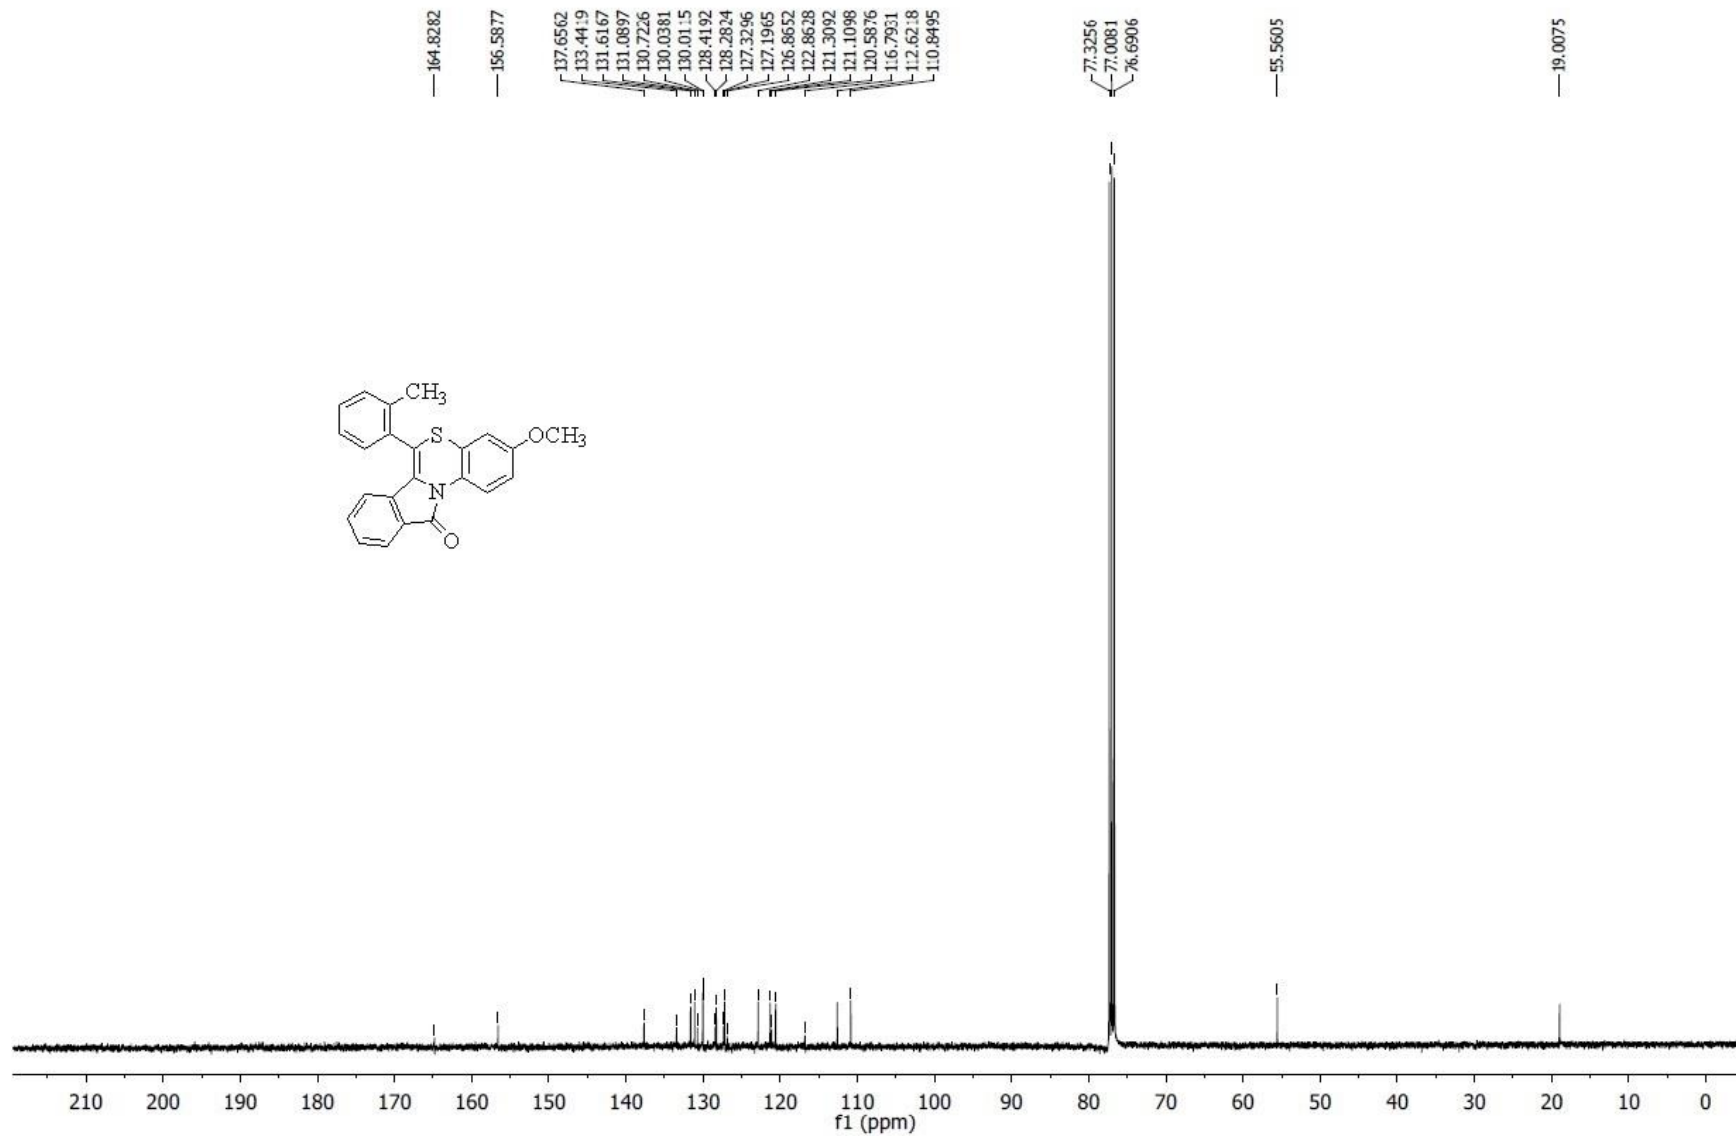



<sup>13</sup>C NMR of 5b

—164.8282

—156.5877

—137.6562

—133.4419

—131.6167

—131.0897

—130.7225

—130.0381

—130.0115

—128.4192

—128.2824

—127.3295

—127.1965

—126.8652

—122.8628

—121.3092

—121.1098

—120.5876

—116.7931

—112.6218

—110.8495

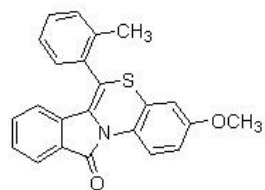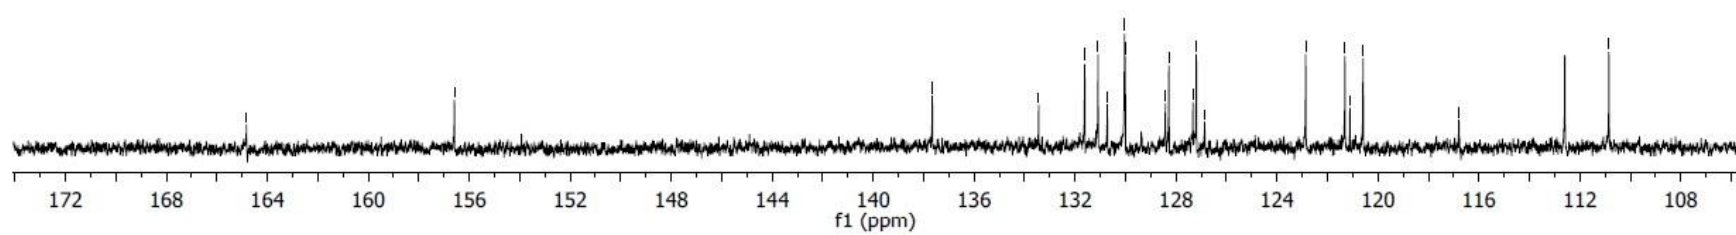

<sup>1</sup>H NMR of 5c

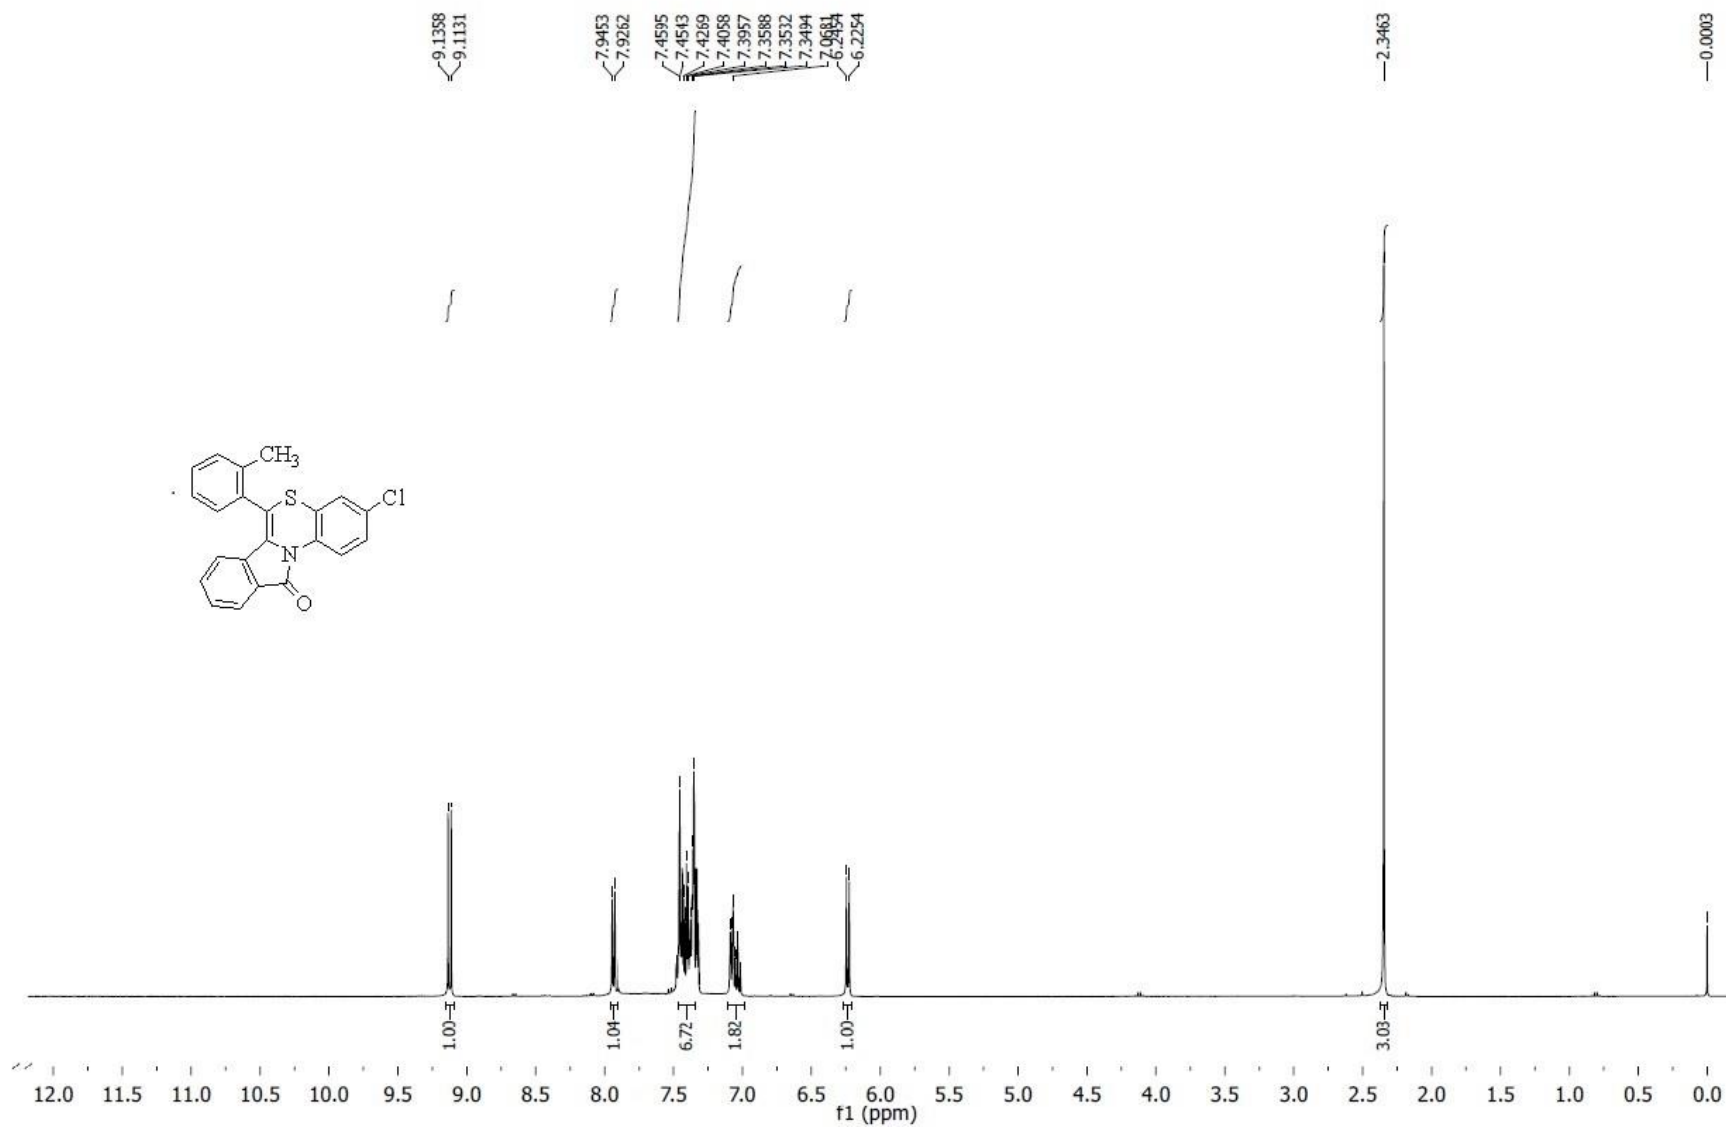

<sup>1</sup>H NMR of 5c

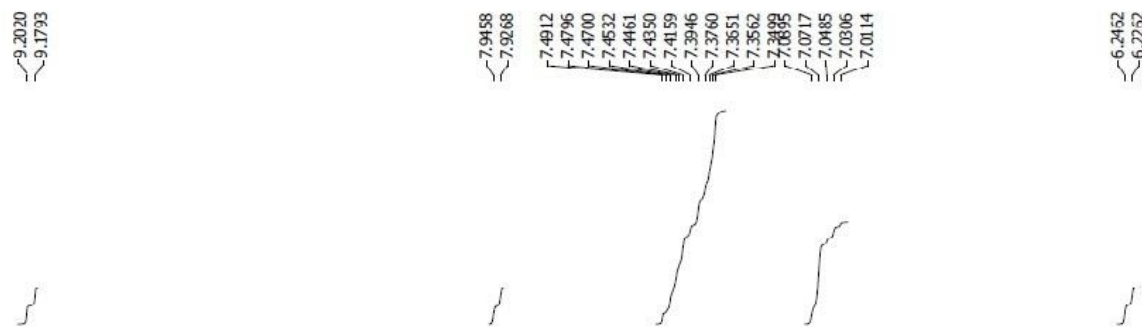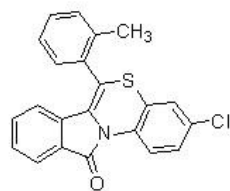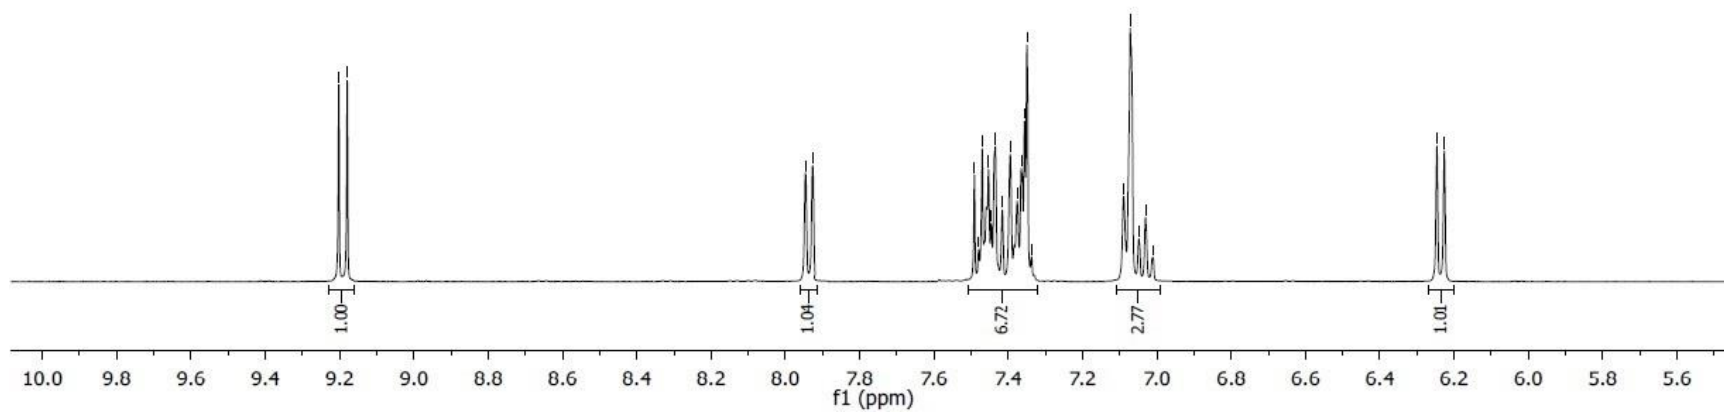

<sup>13</sup>C NMR of 5c

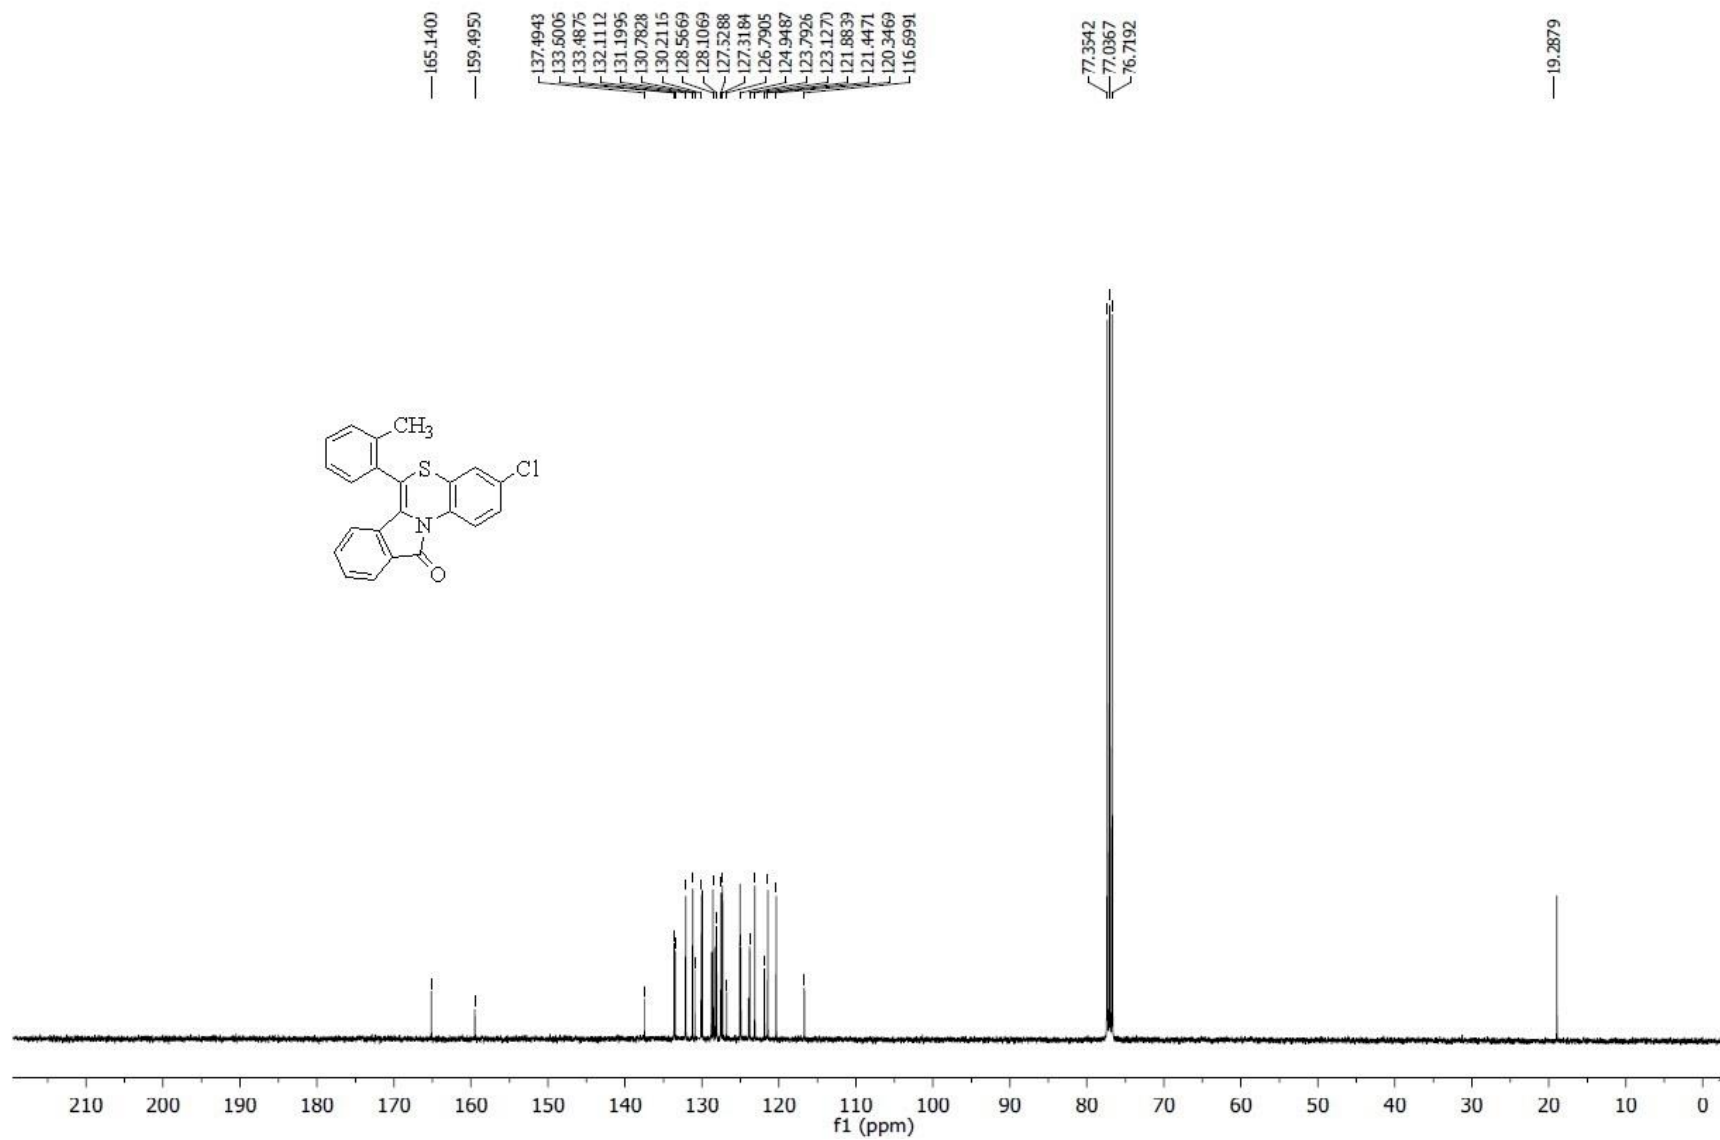

<sup>13</sup>C NMR of 5c

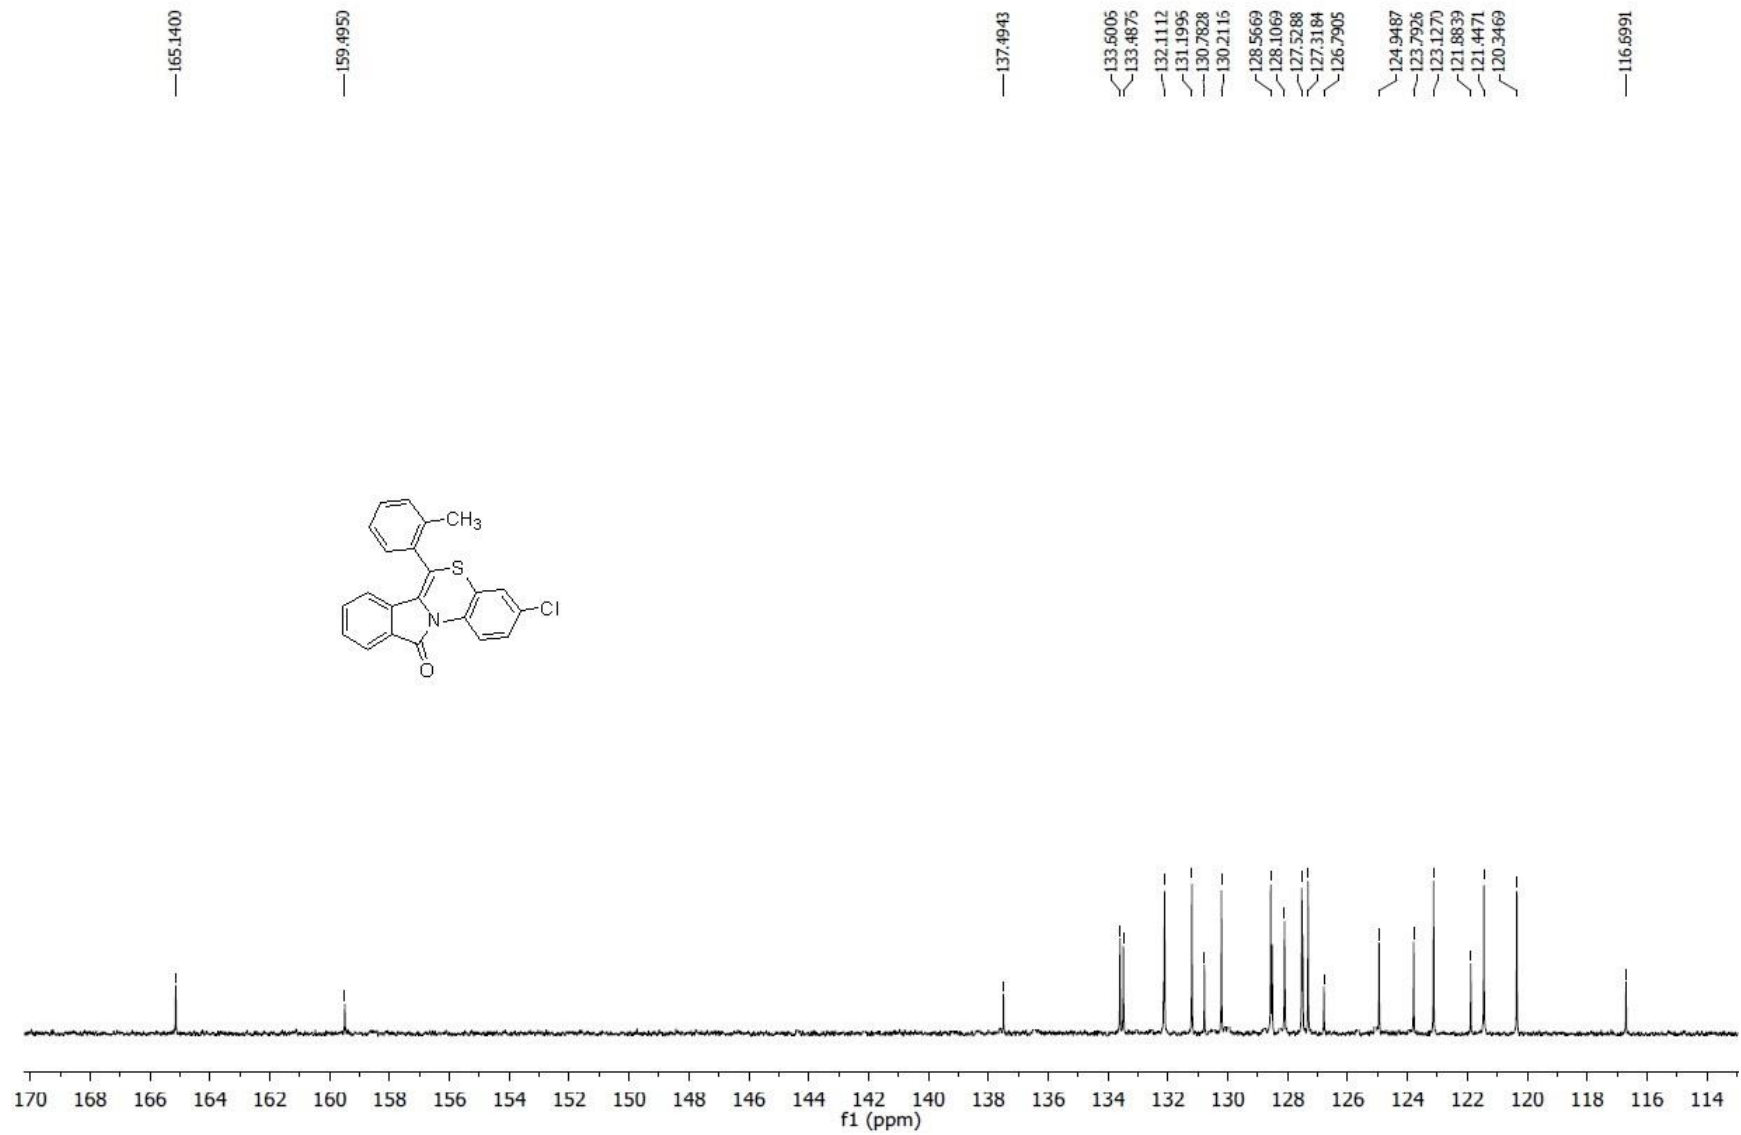

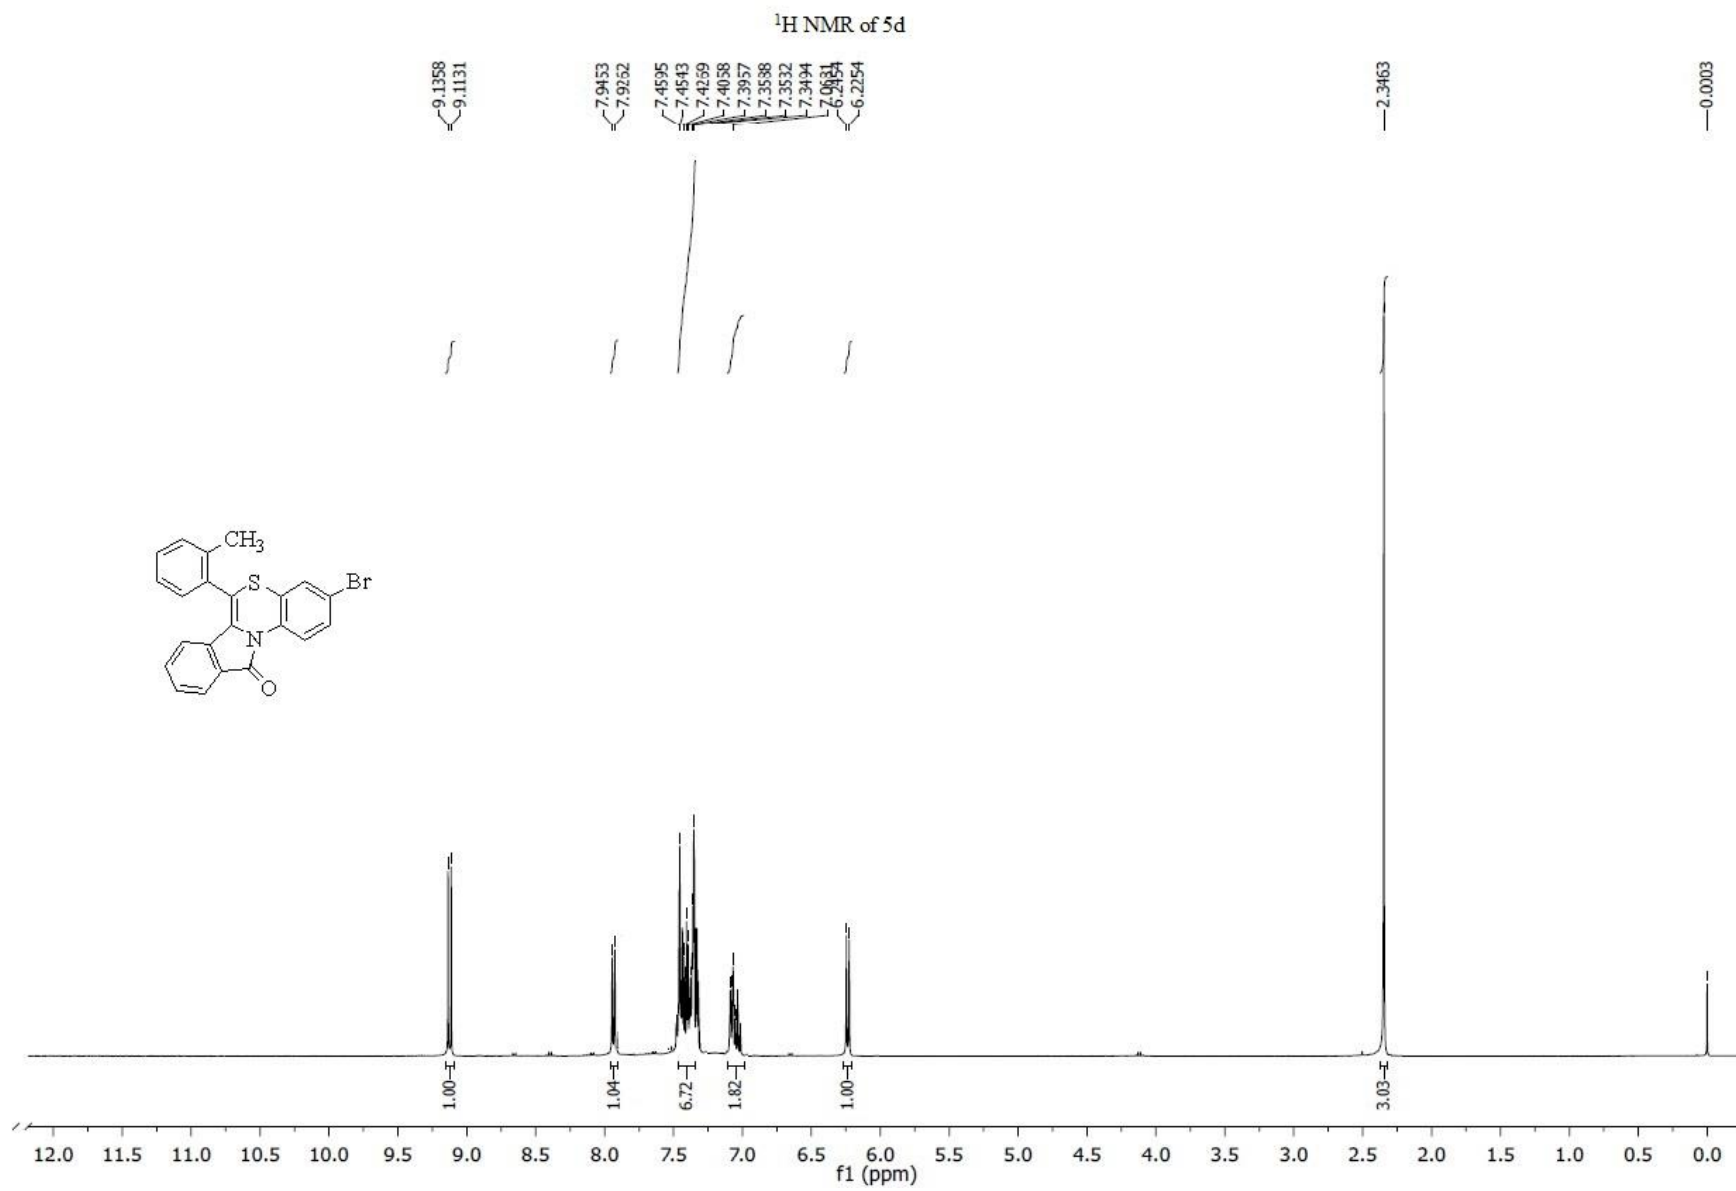

<sup>1</sup>H NMR of 5d

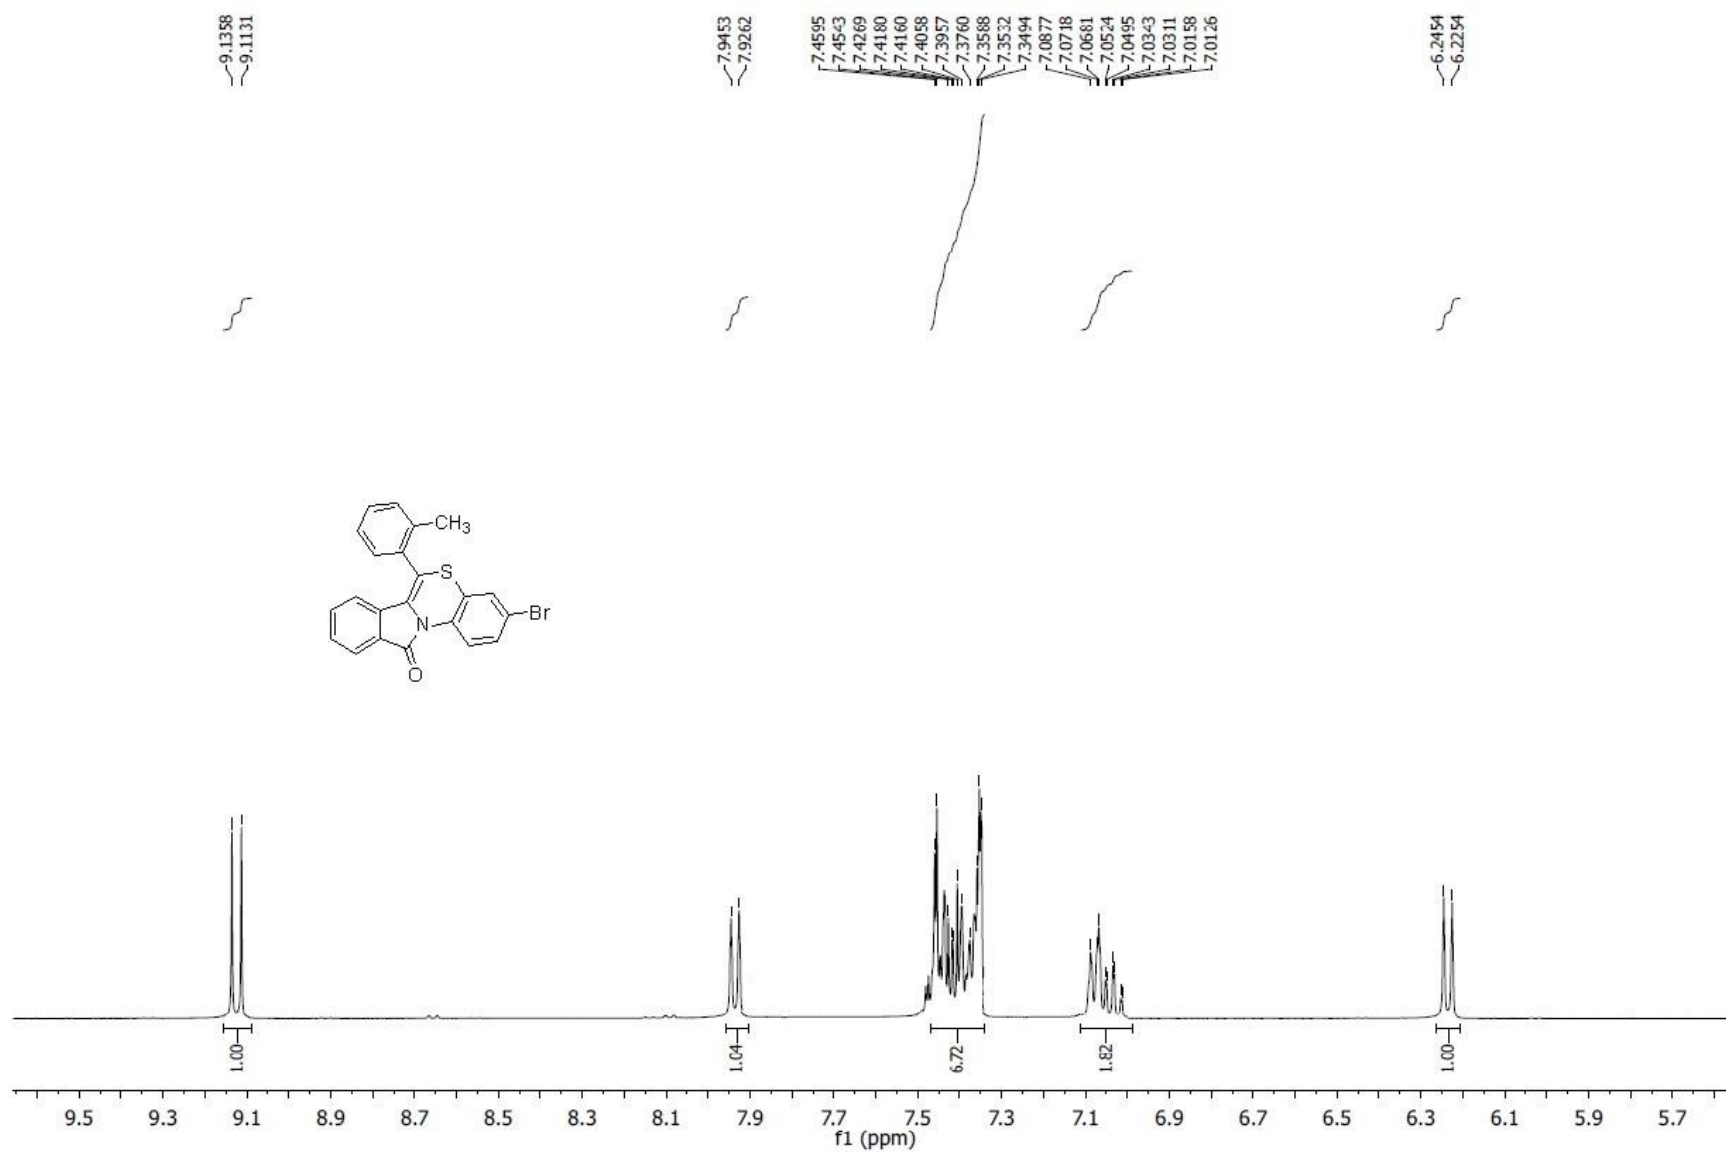

<sup>13</sup>C NMR of 5d

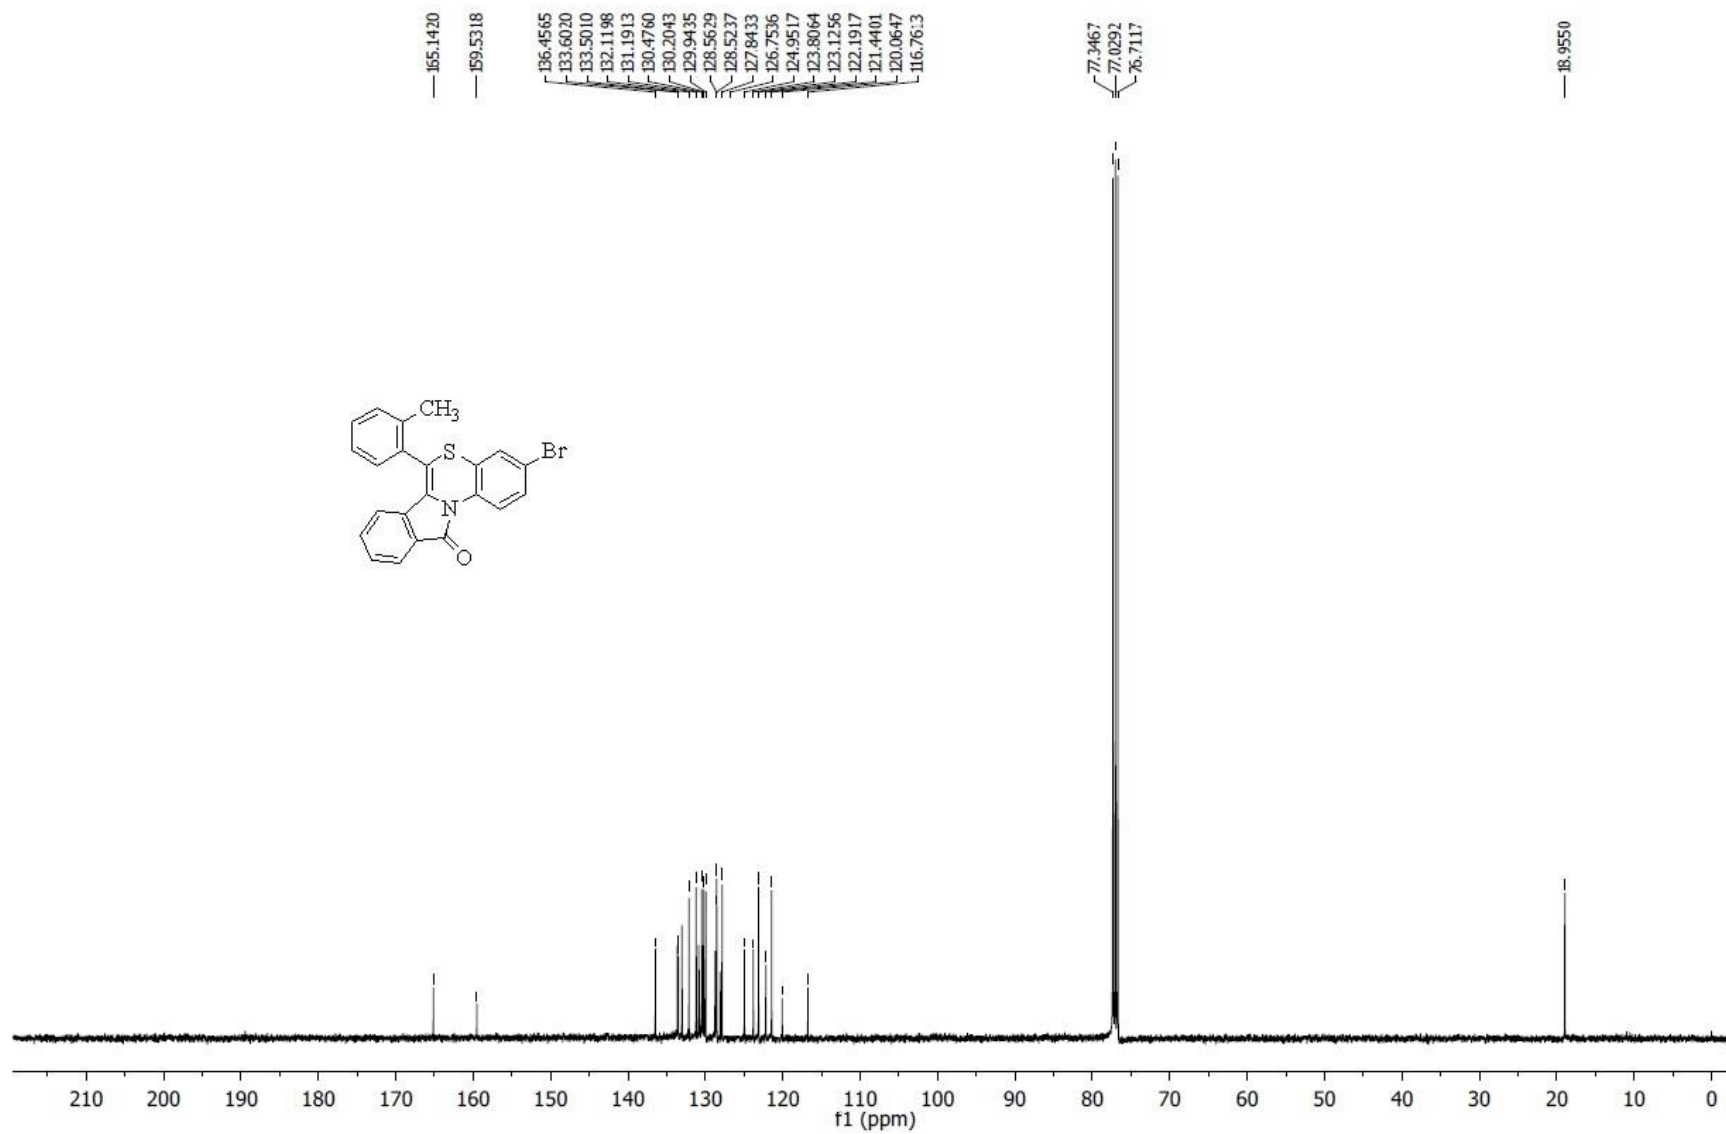



<sup>13</sup>C NMR of 5d

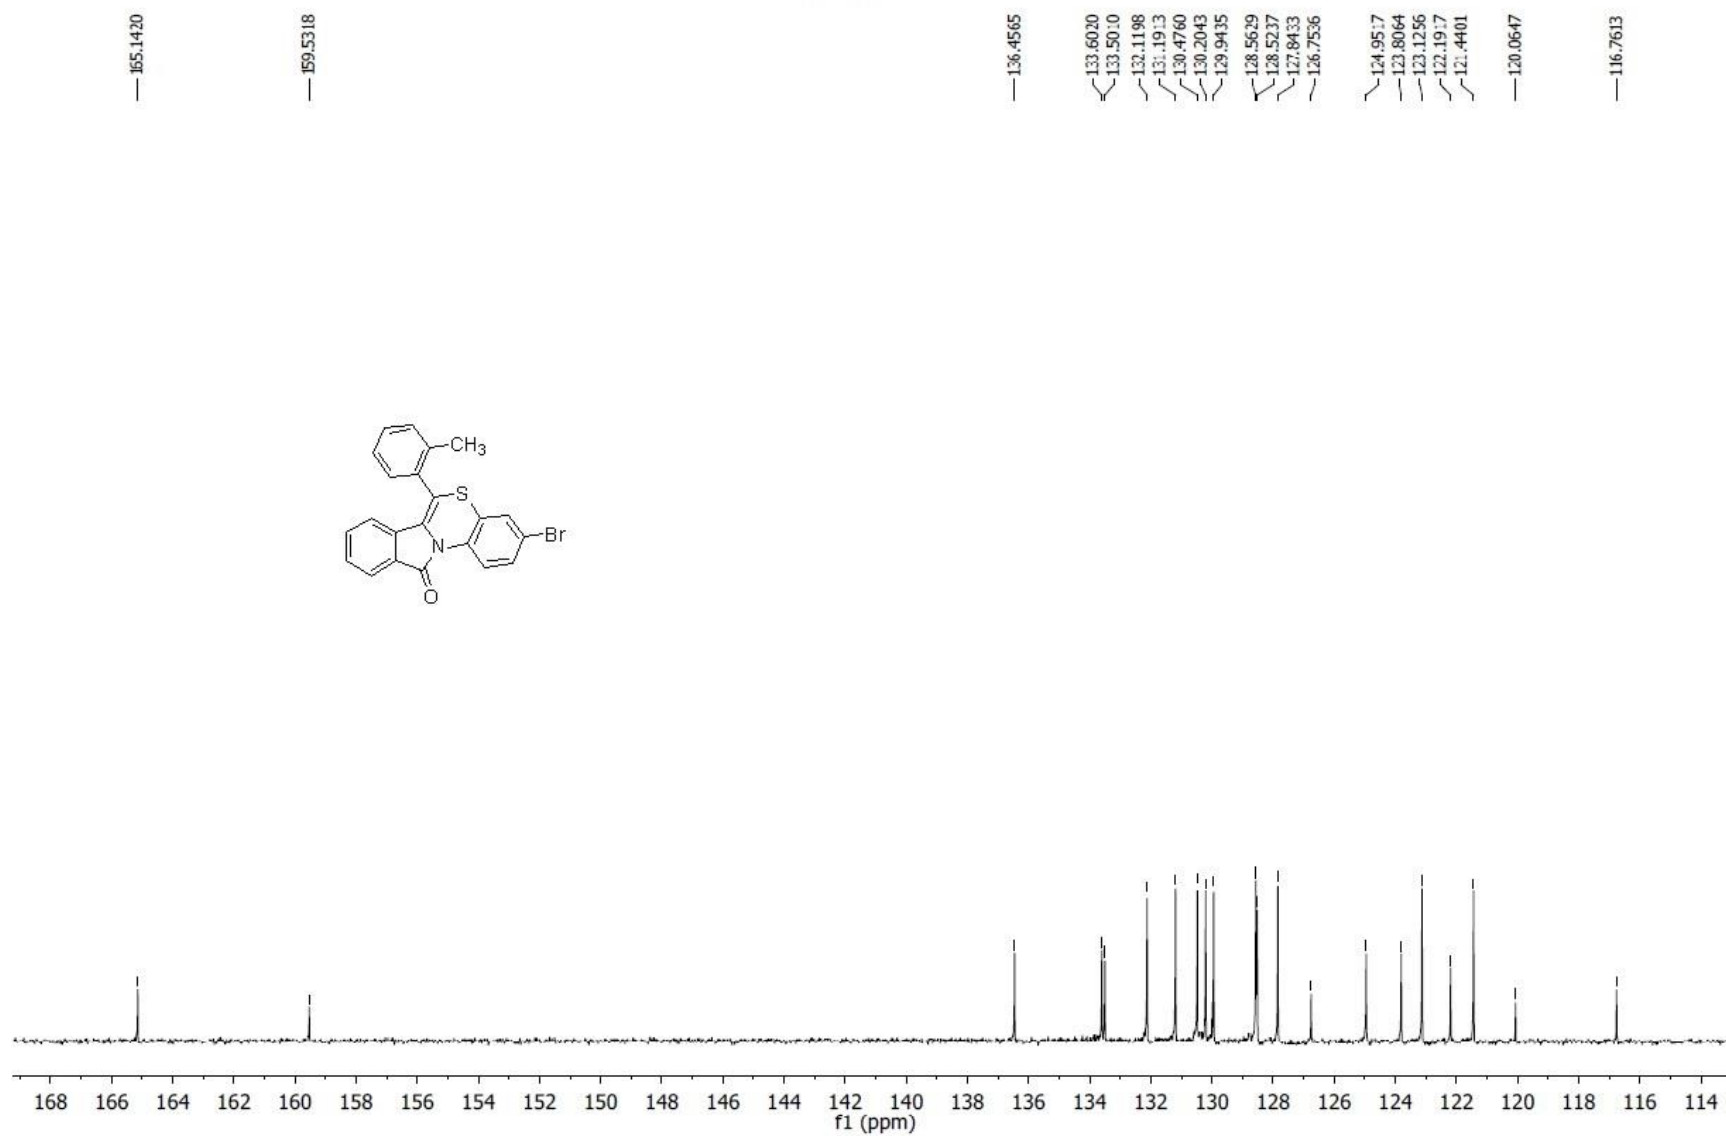

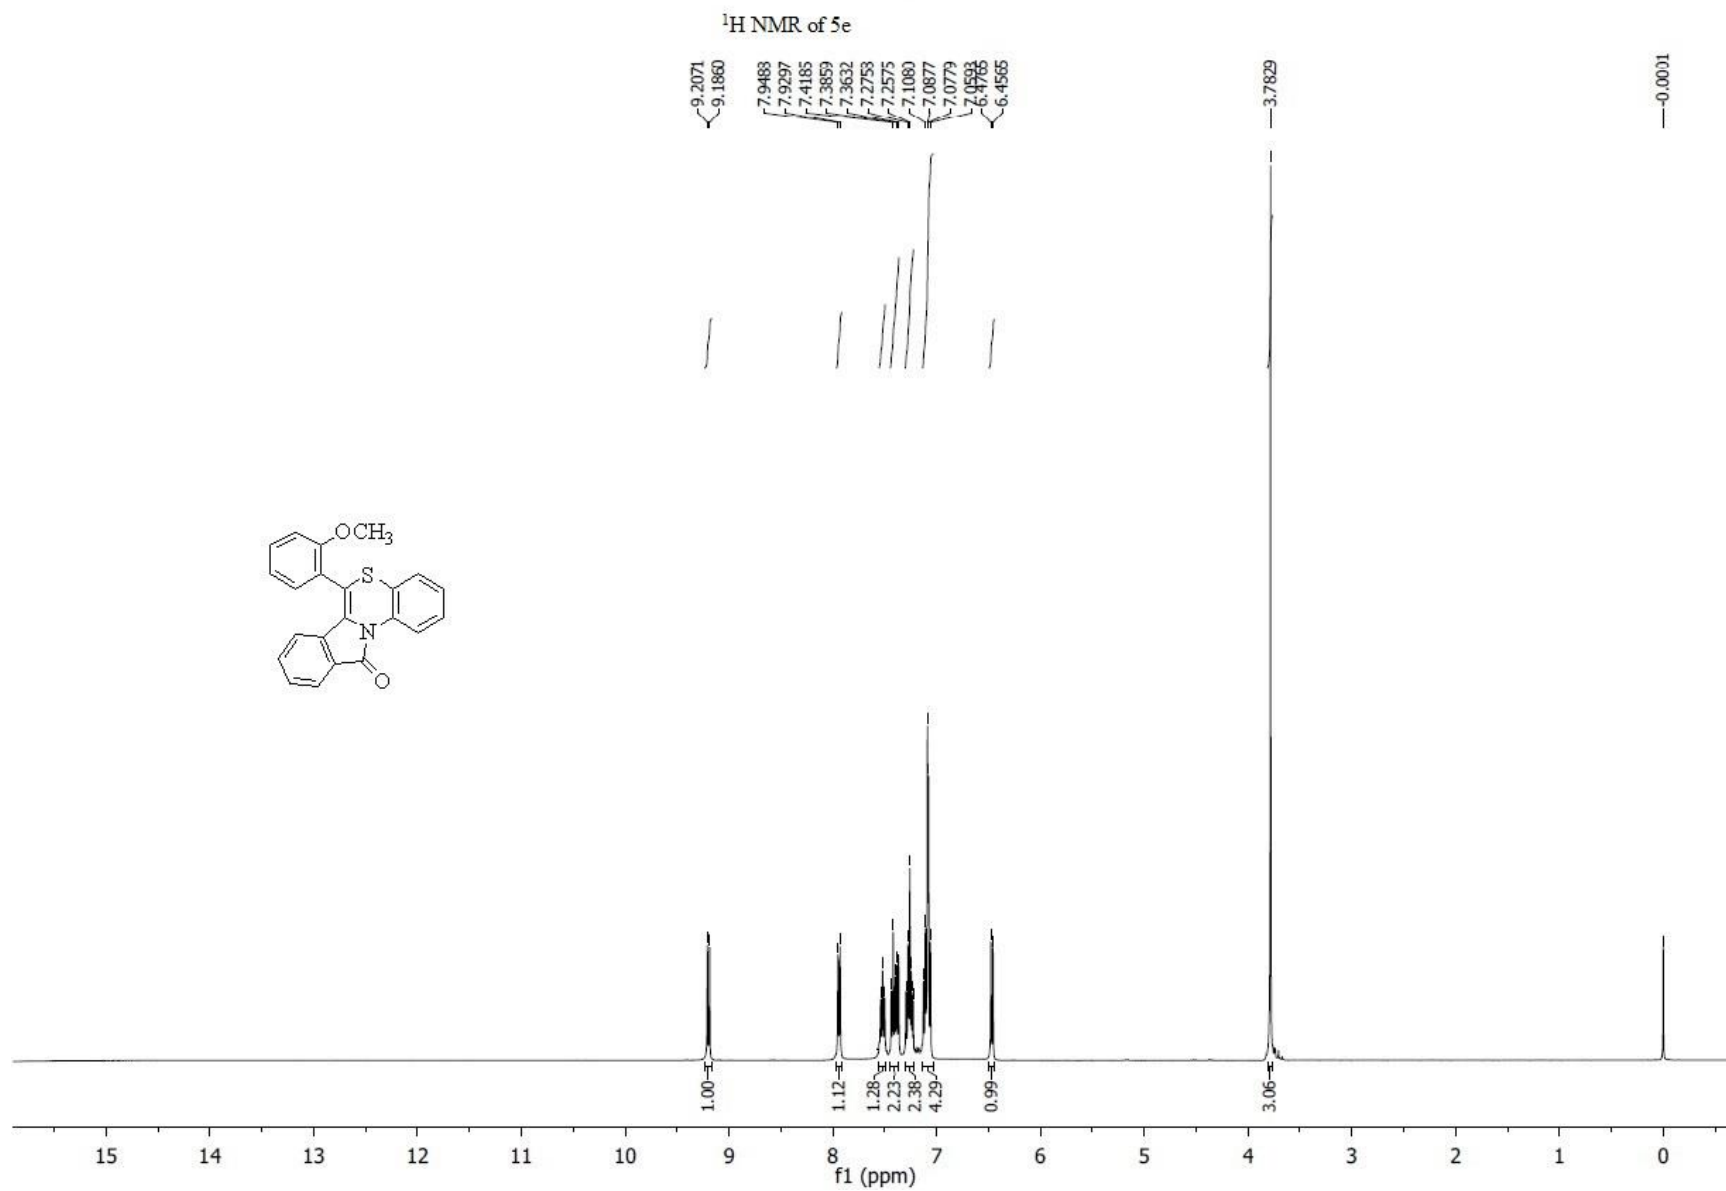

<sup>1</sup>H NMR of 5e

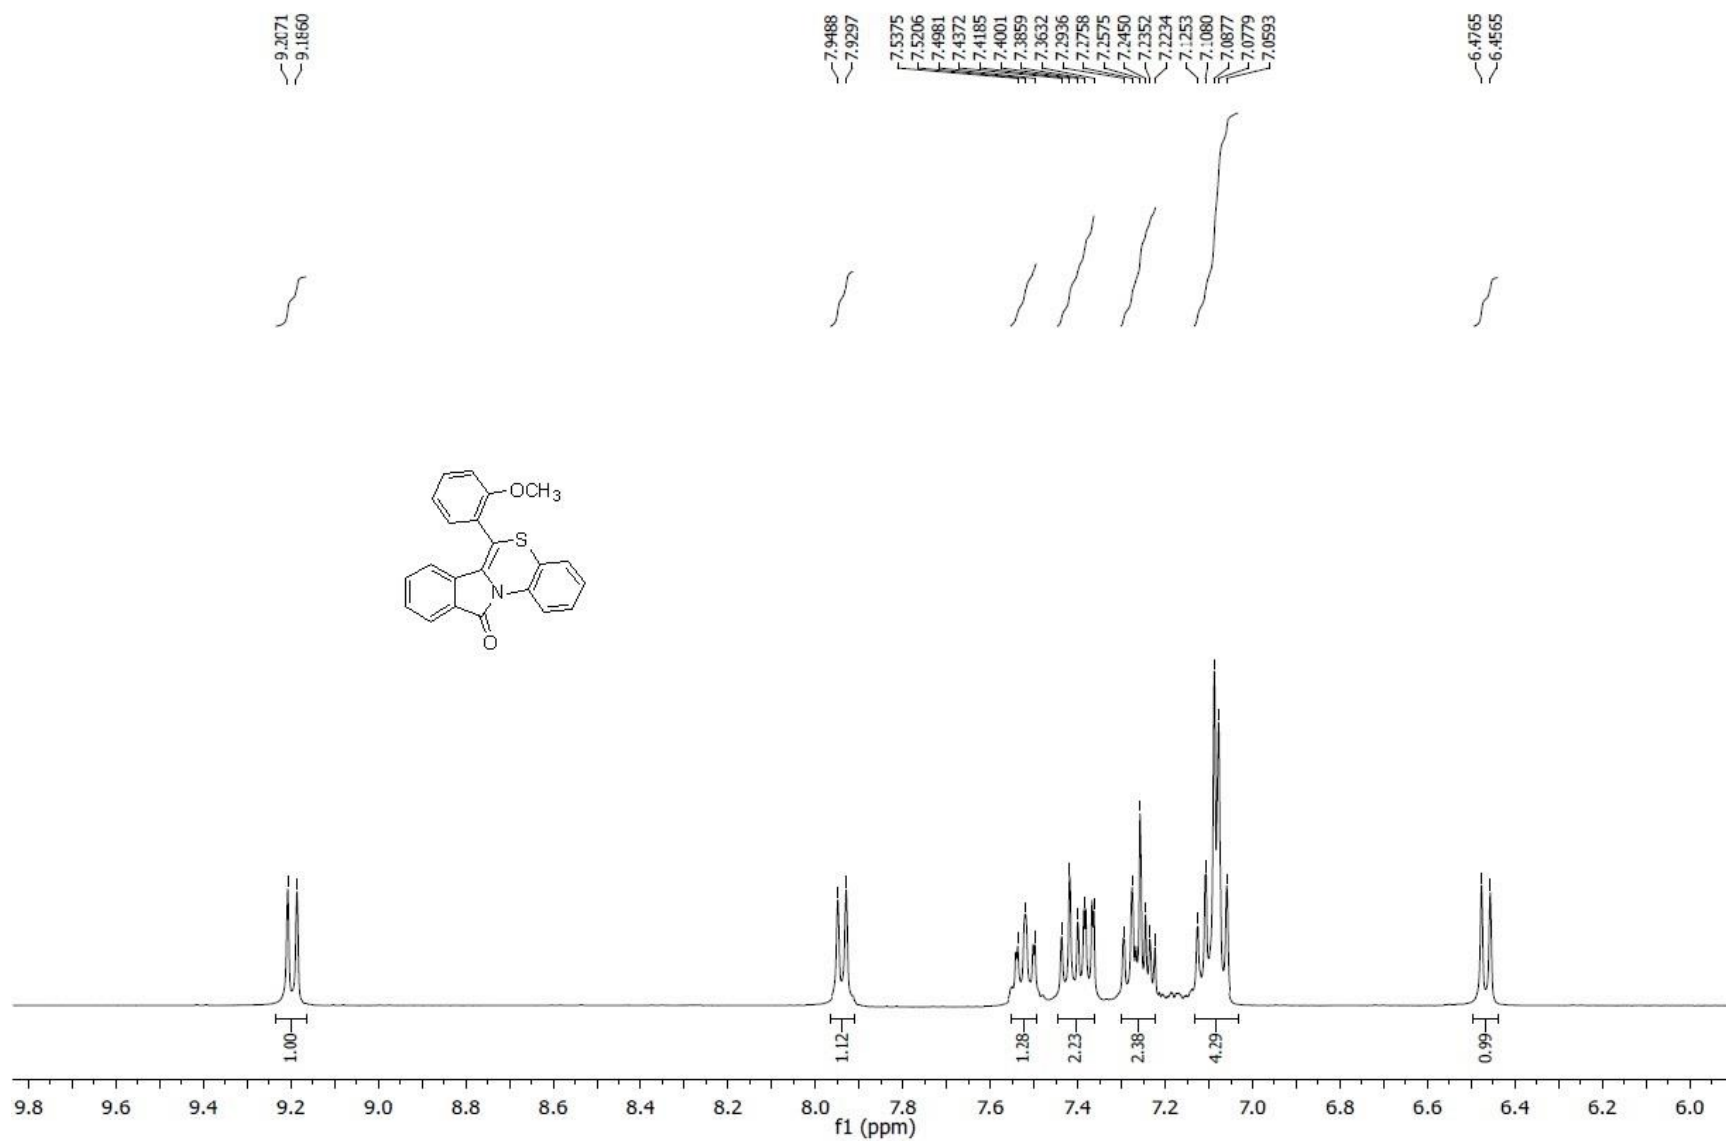

<sup>1</sup>H NMR of 5e

165.2601  
157.5725  
133.9810  
131.6260  
131.5316  
131.4172  
131.0732  
128.2740  
128.1386  
127.5316  
125.5735  
125.3716  
122.9564  
121.6239  
121.5111  
120.2972  
119.3932  
114.9005  
111.9266  
77.3557  
77.0380  
76.7204  
55.9221

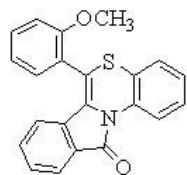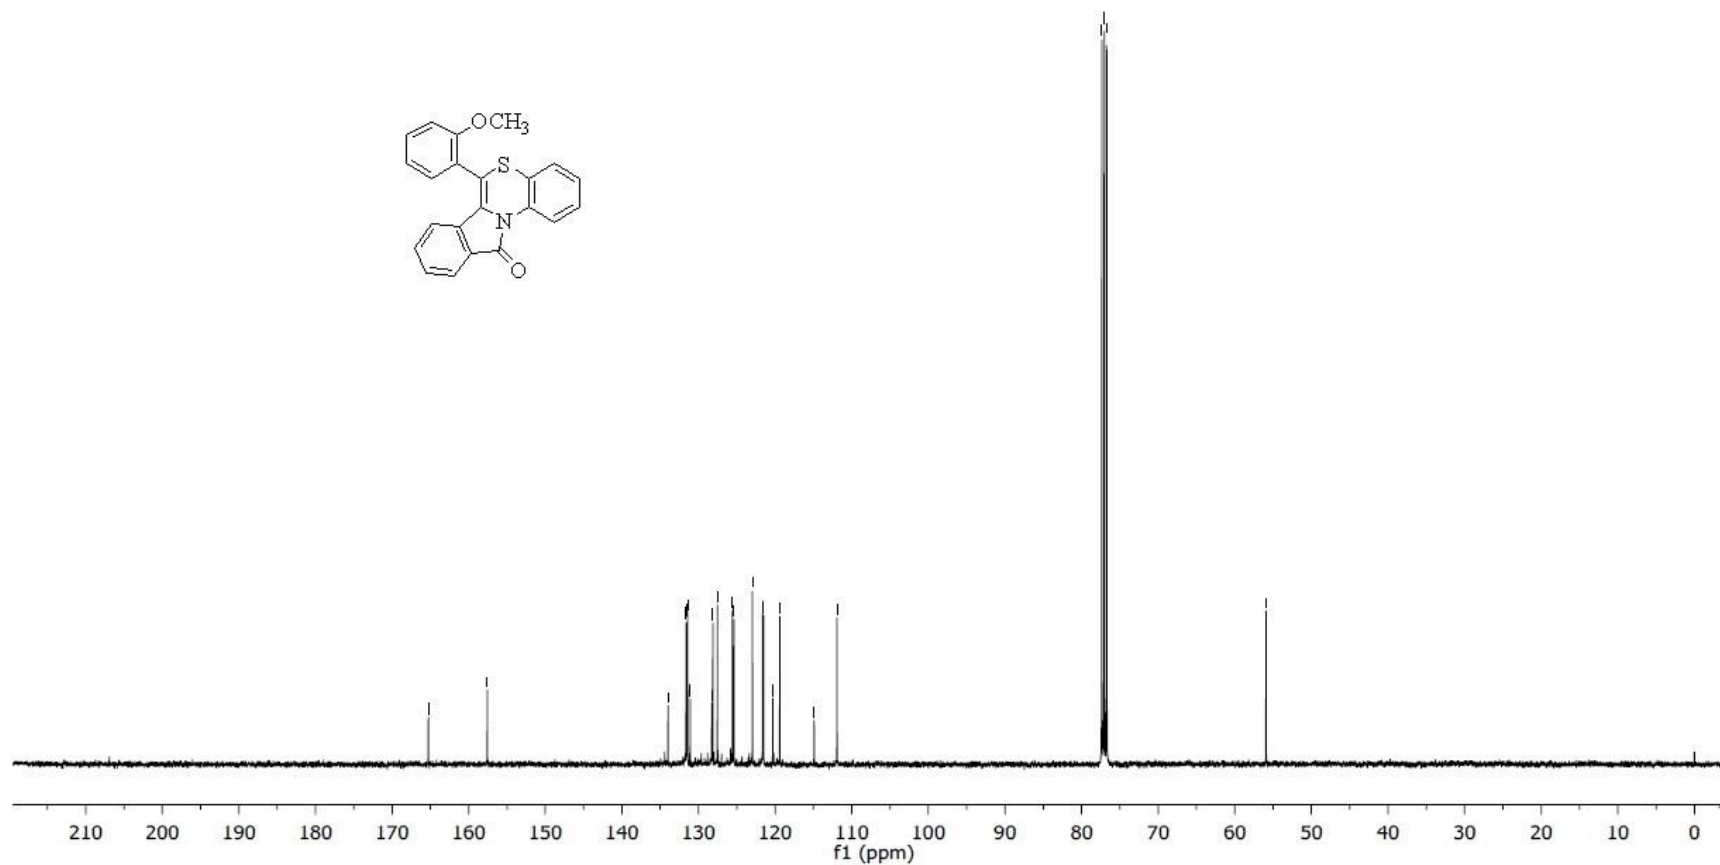

<sup>13</sup>C NMR of 5e

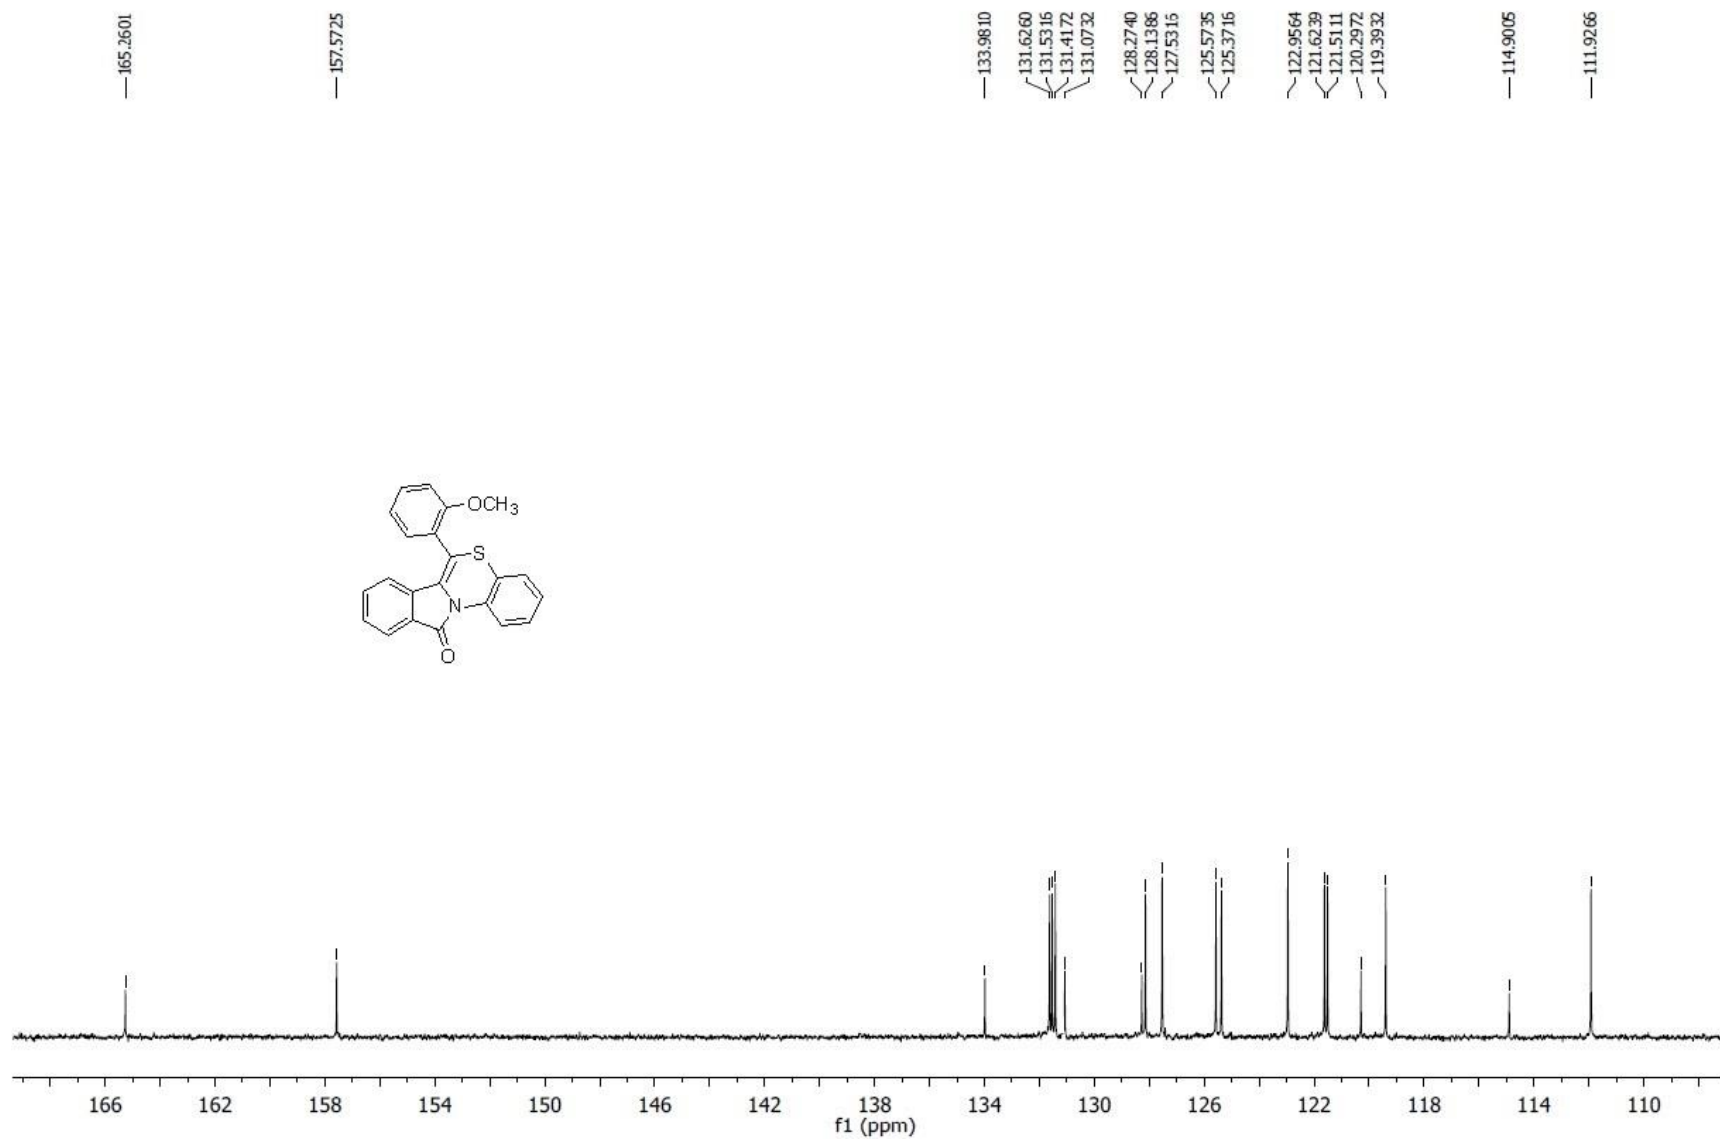

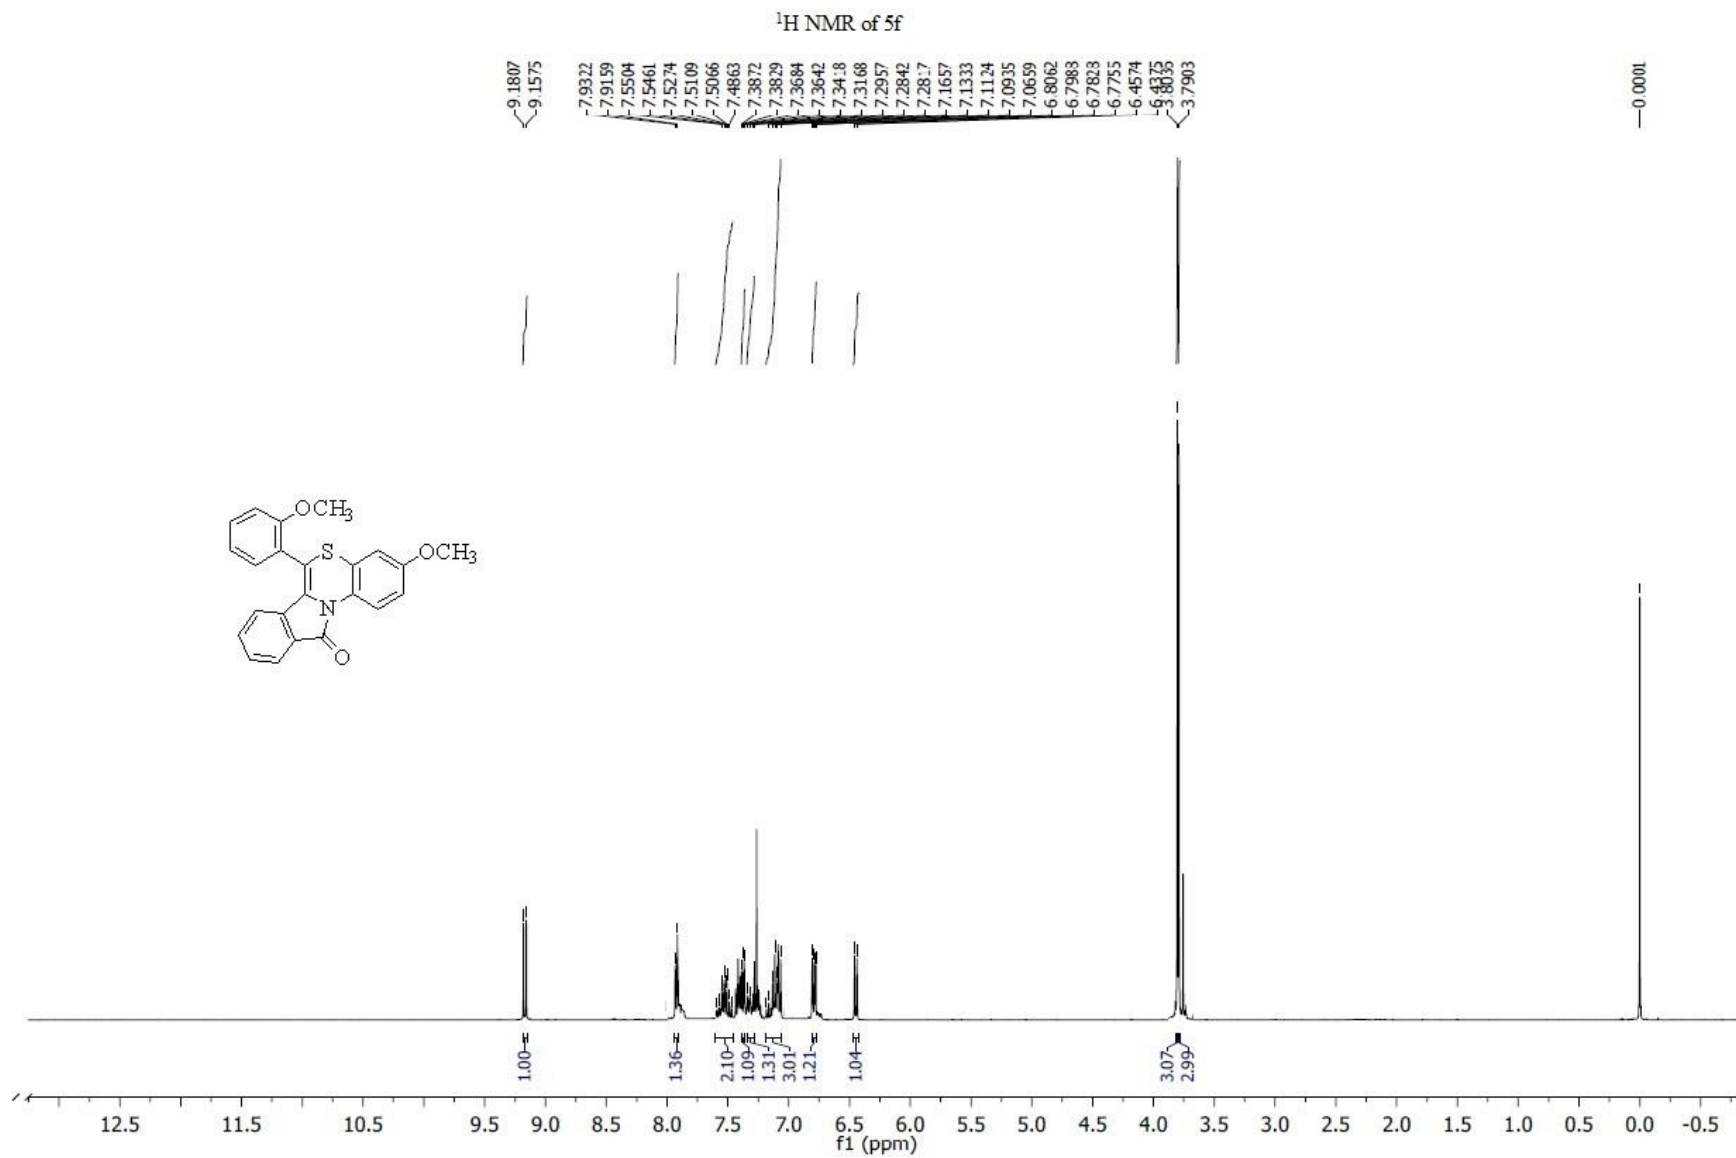

<sup>1</sup>H NMR of 5f

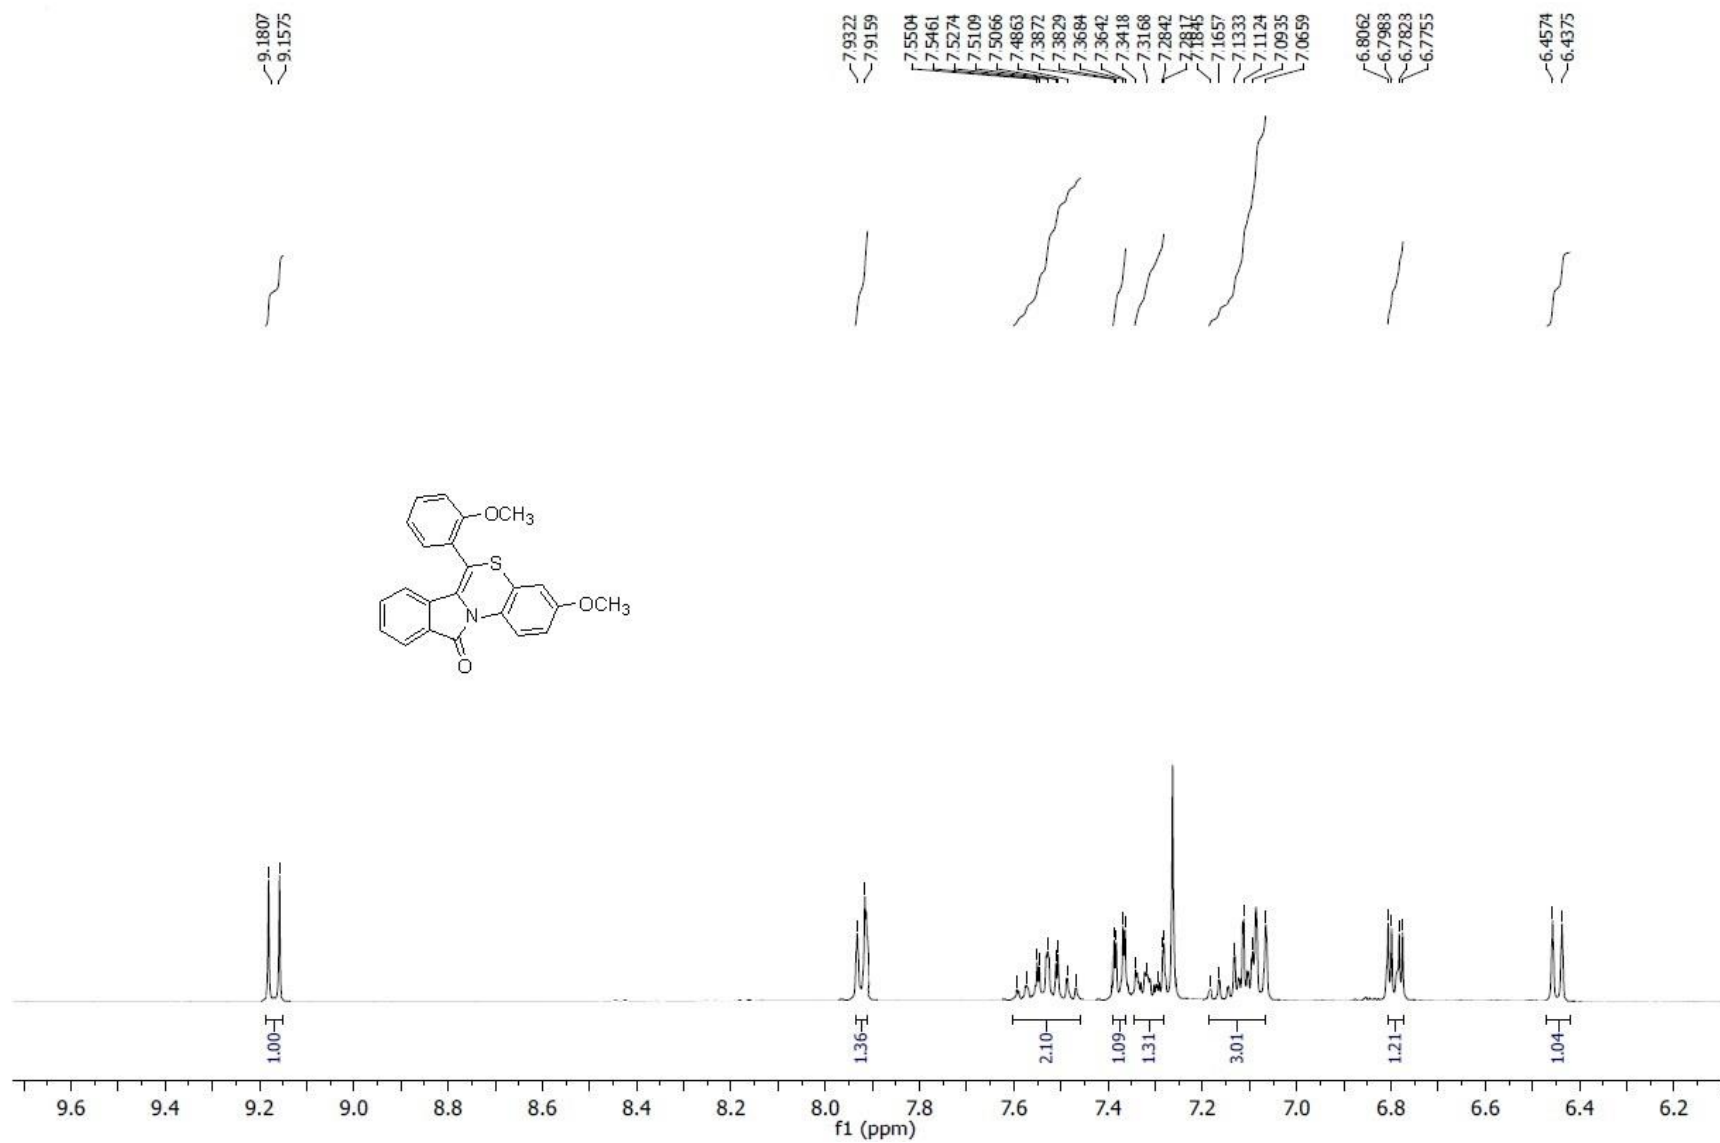

<sup>13</sup>C NMR of 5f

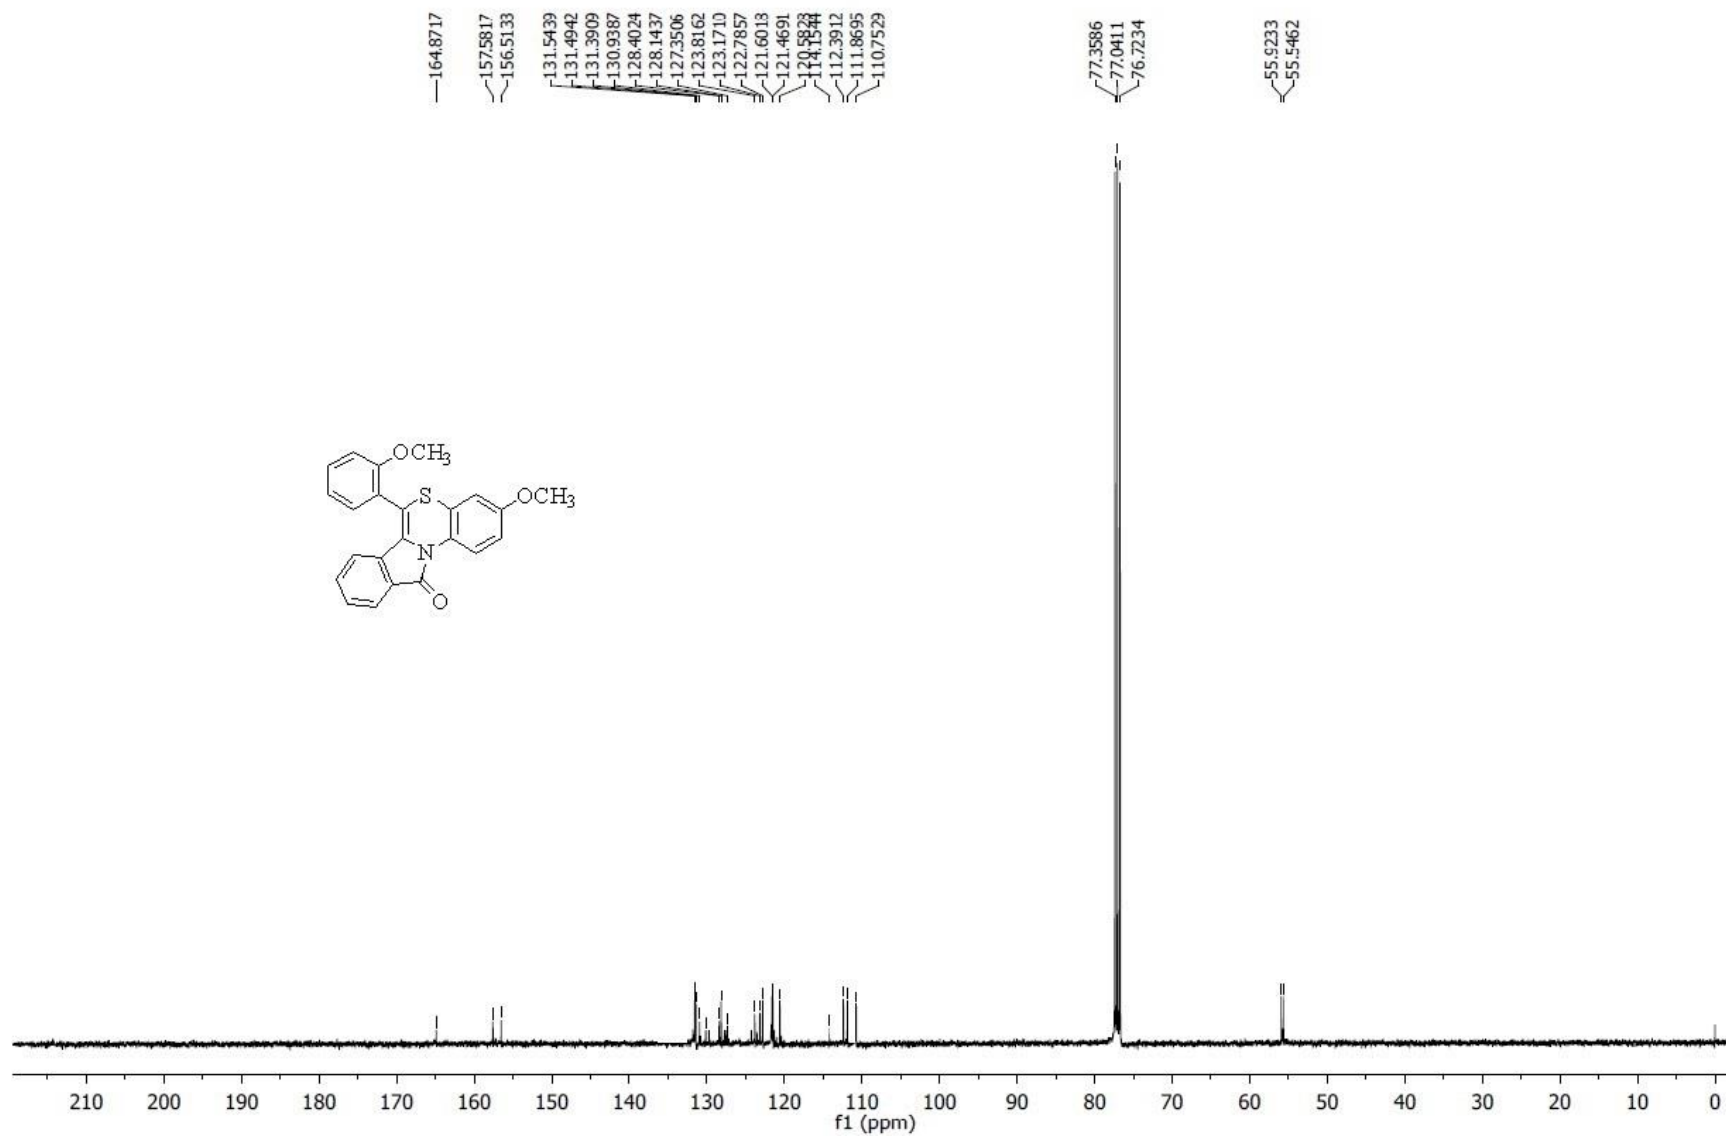



<sup>13</sup>C NMR of 5f

—164.8717

—157.5817

—156.5133

131.5439  
131.4942  
131.3909  
130.9387  
130.1399  
128.4024  
128.1437  
127.3506

123.8162  
123.1710  
122.7857  
121.6013  
121.4691  
120.5823

—114.1544  
—112.3912  
—111.8695  
—110.7523

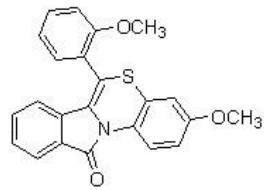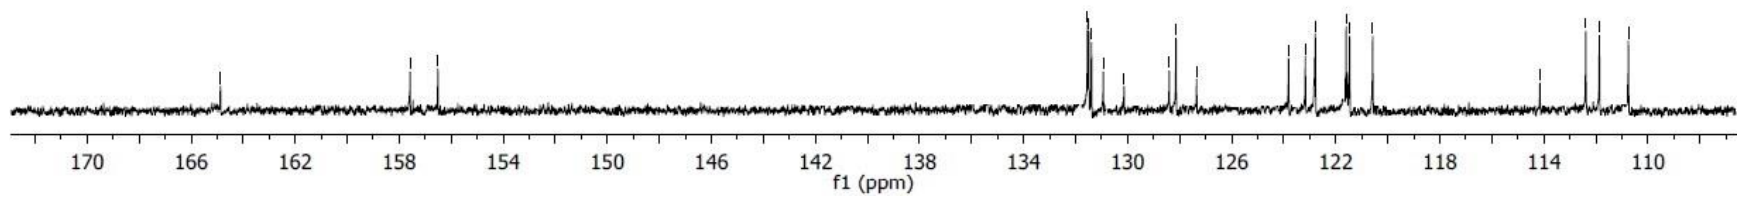

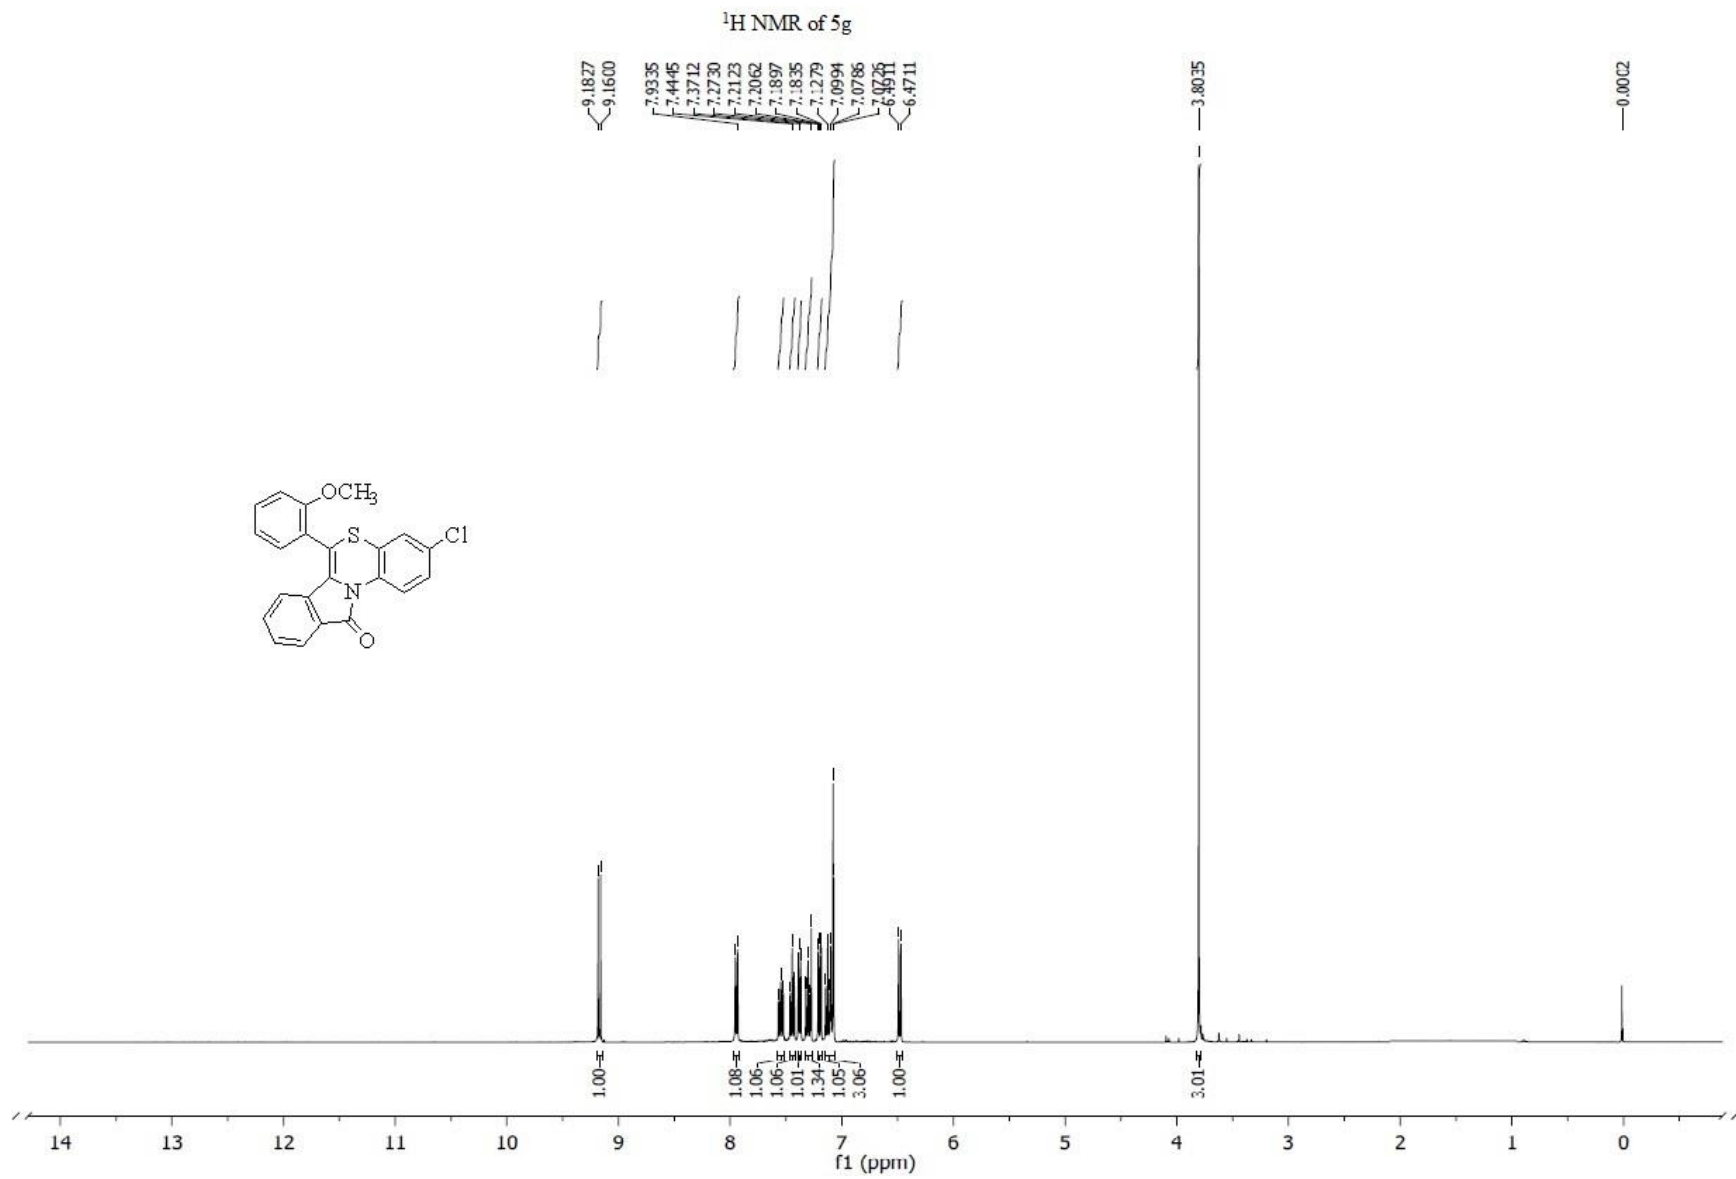

<sup>1</sup>H NMR of 5g

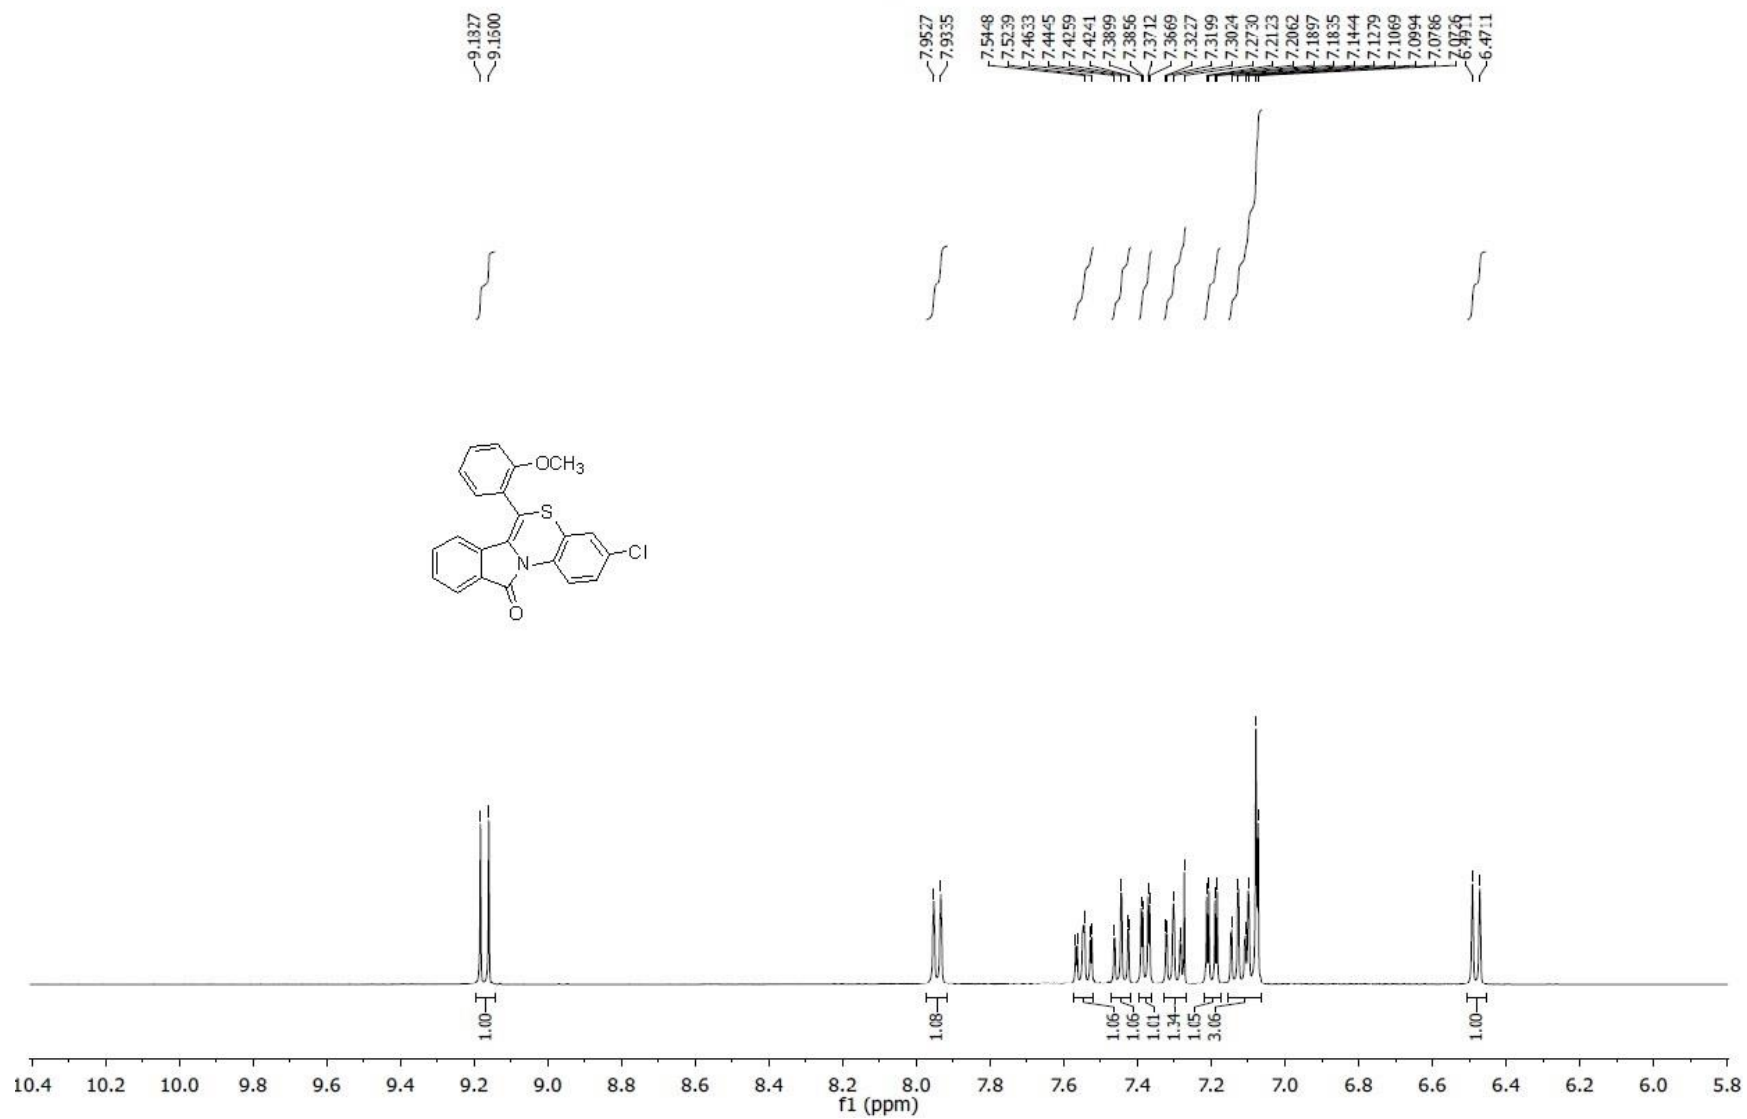

<sup>1</sup>H NMR of 5g

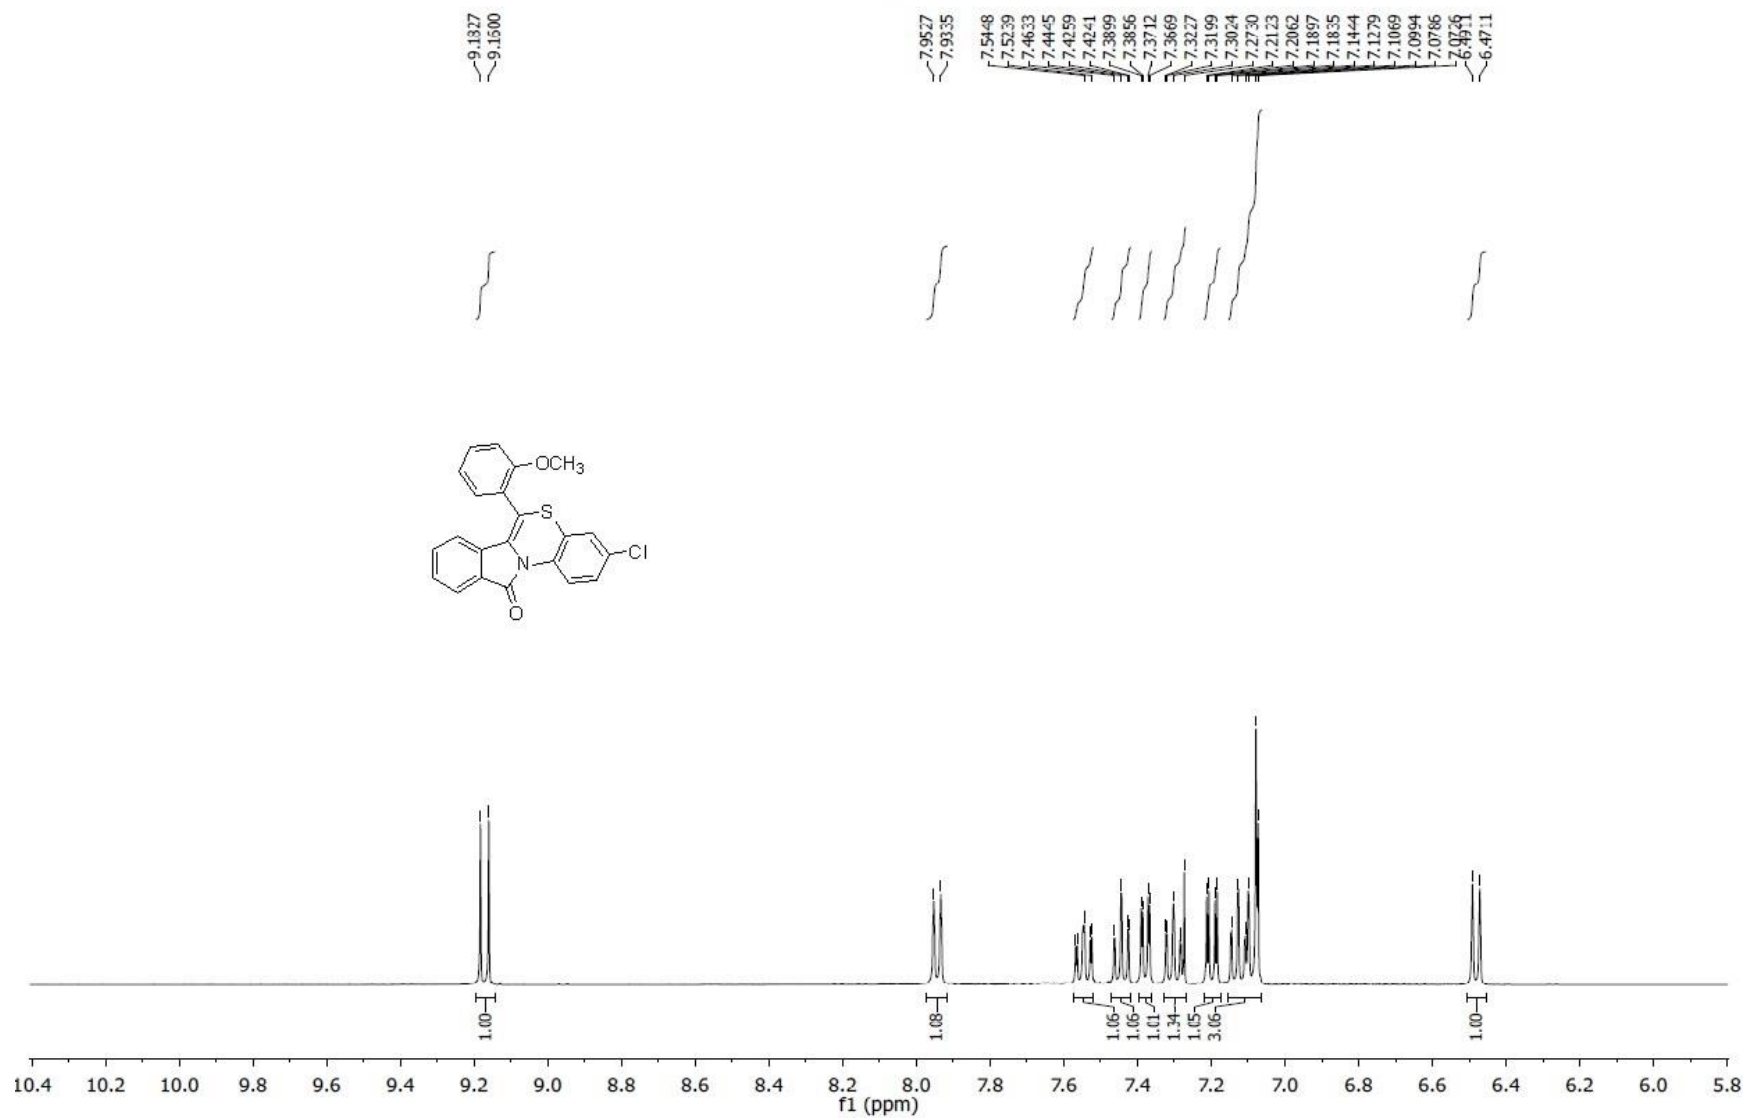

<sup>13</sup>C NMR of 5g

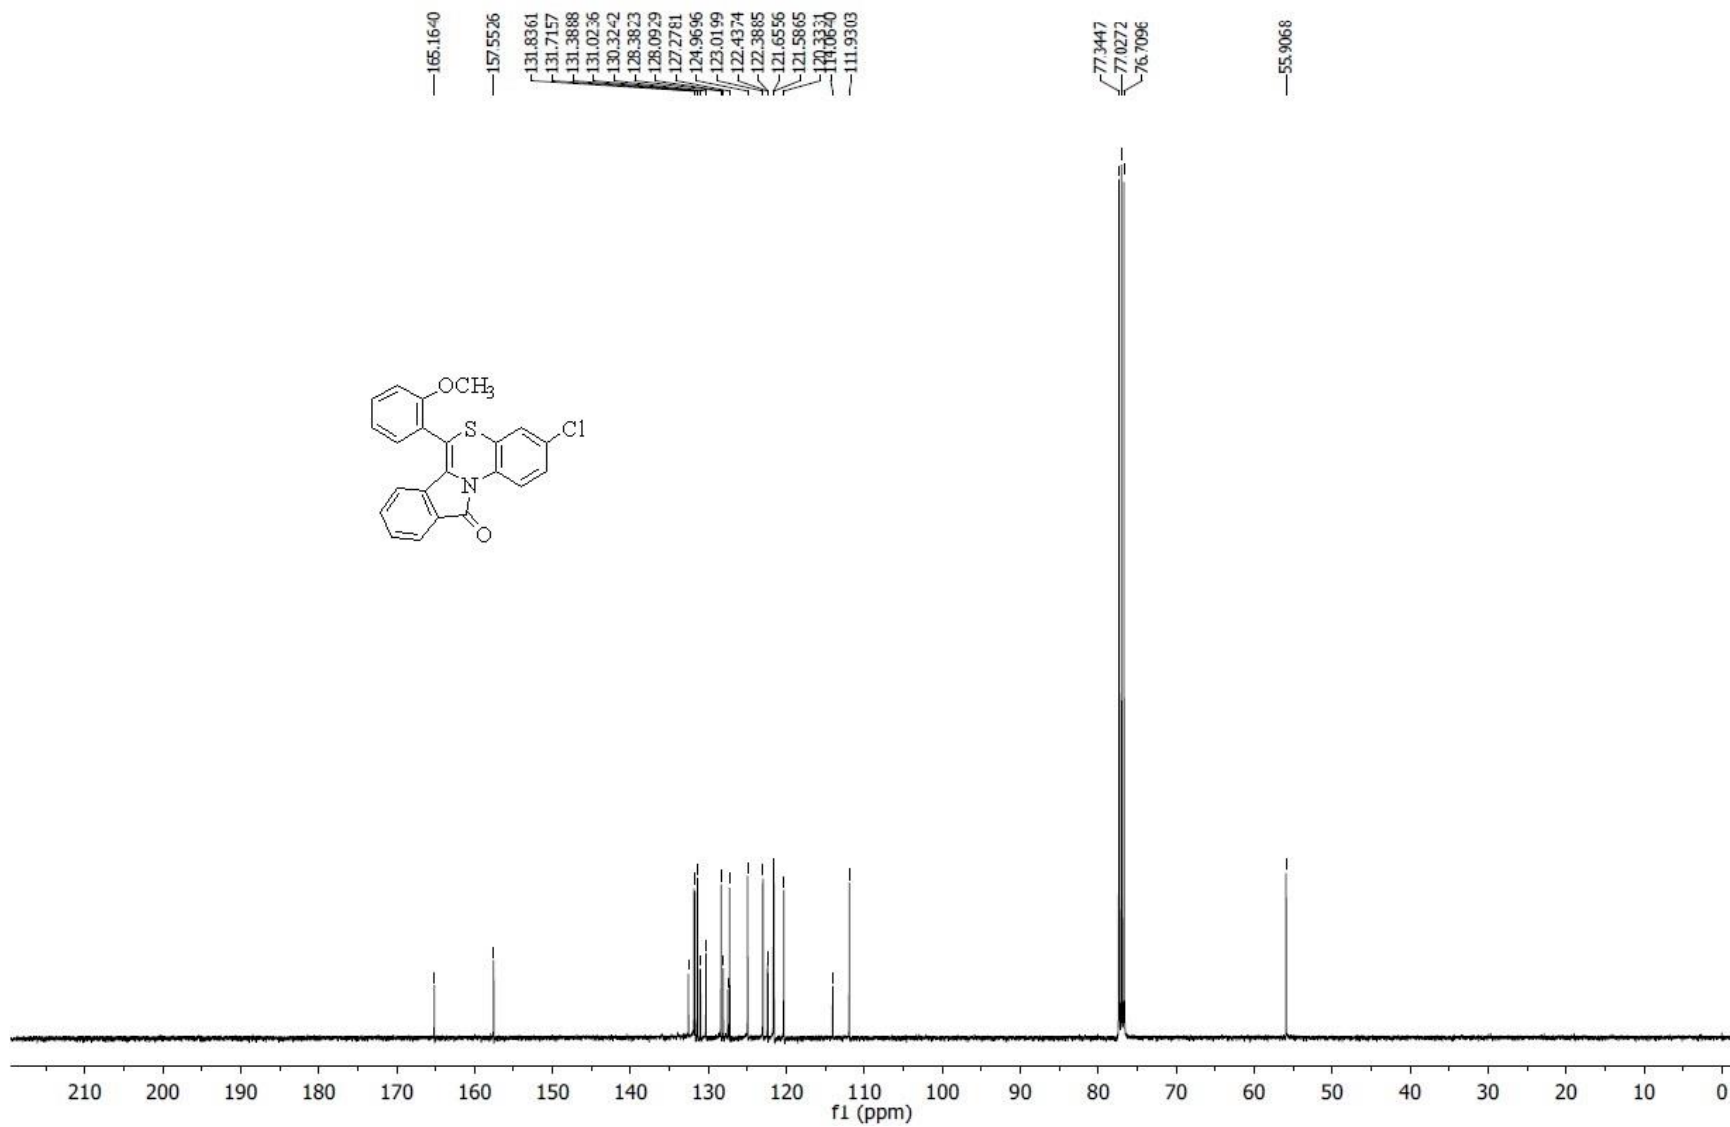

<sup>13</sup>C NMR of 5g

—165.1640

—157.5526

132.5647  
131.8361  
131.7157  
131.3888  
131.0236  
130.3242  
128.3823  
128.0929  
127.5139  
127.2781  
—124.9695  
123.0199  
122.4374  
122.3885  
121.6555  
121.5865  
120.3331

—114.0640

—111.9303

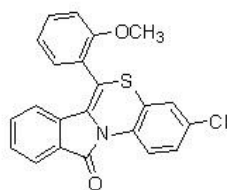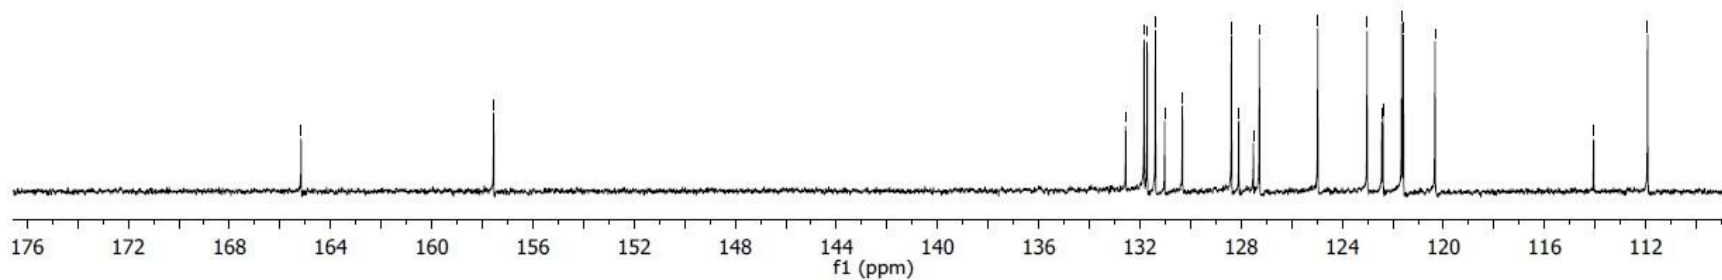

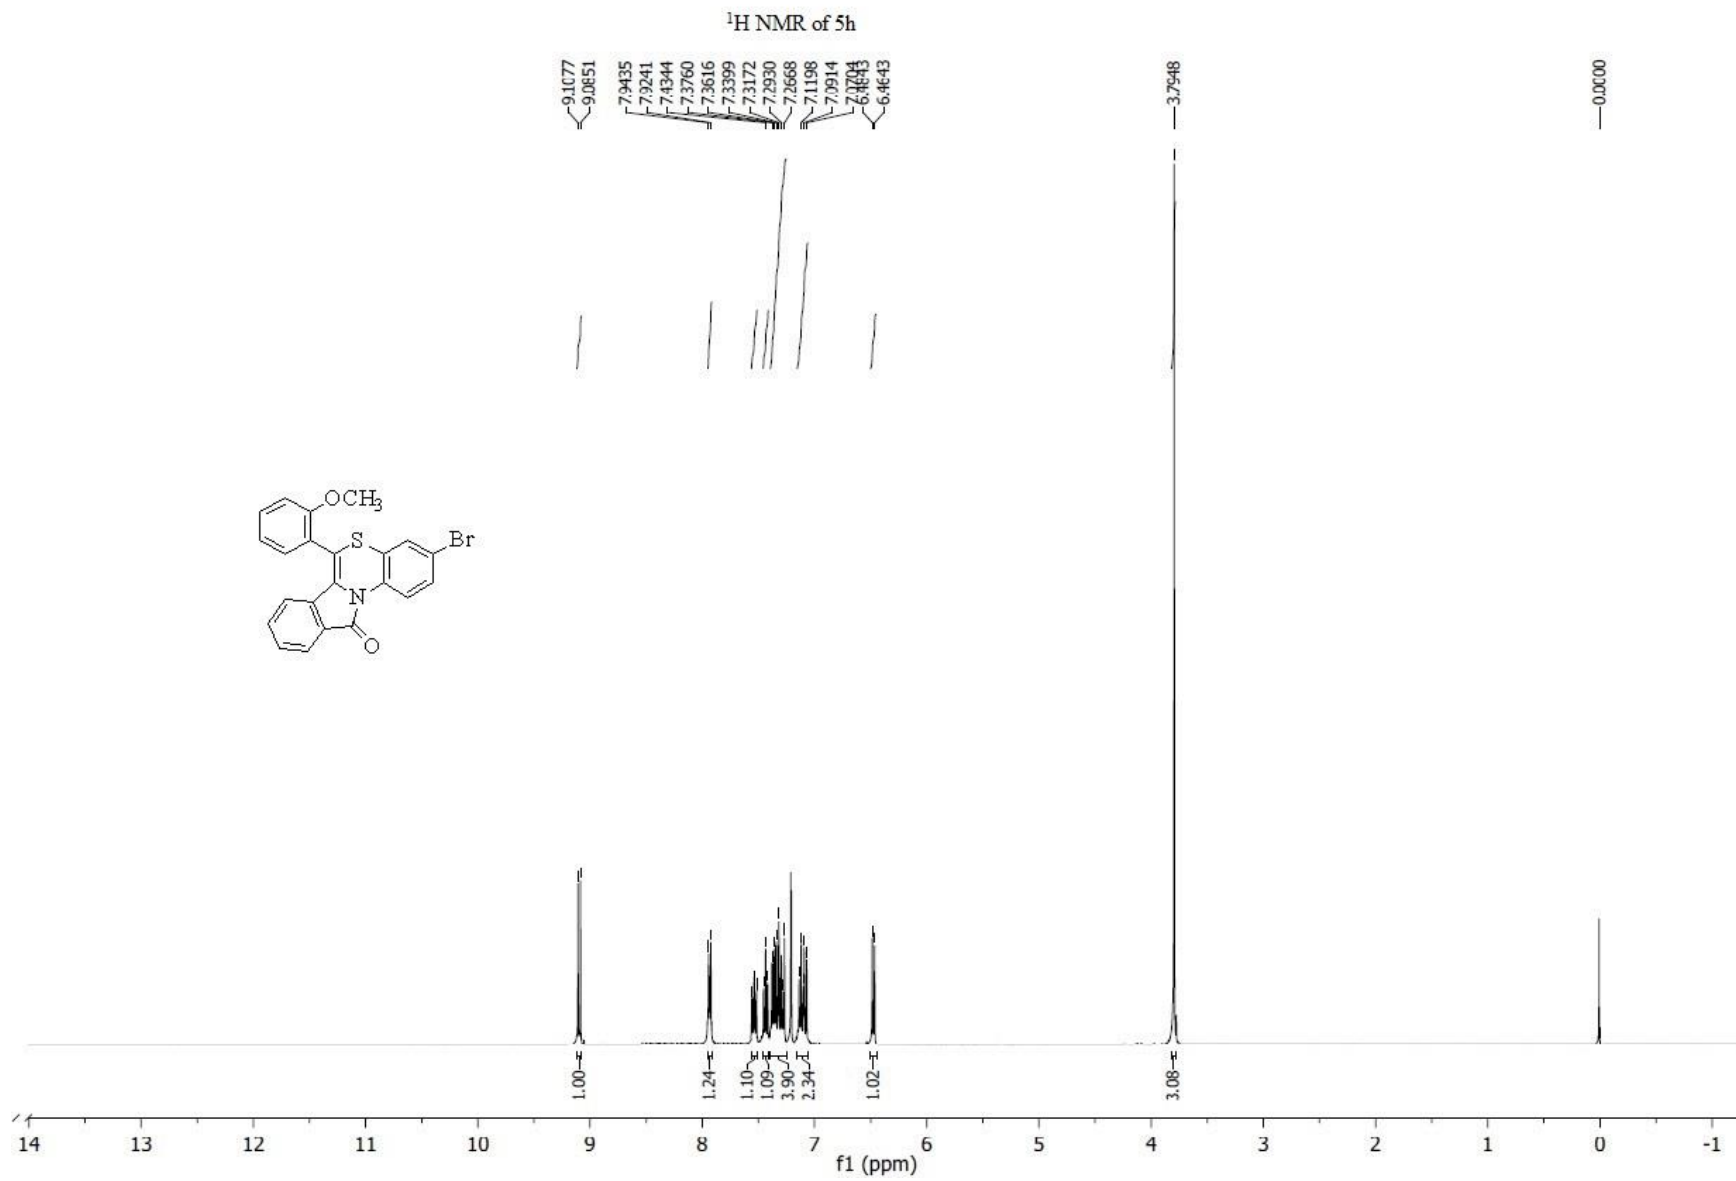

<sup>1</sup>H NMR of 5h

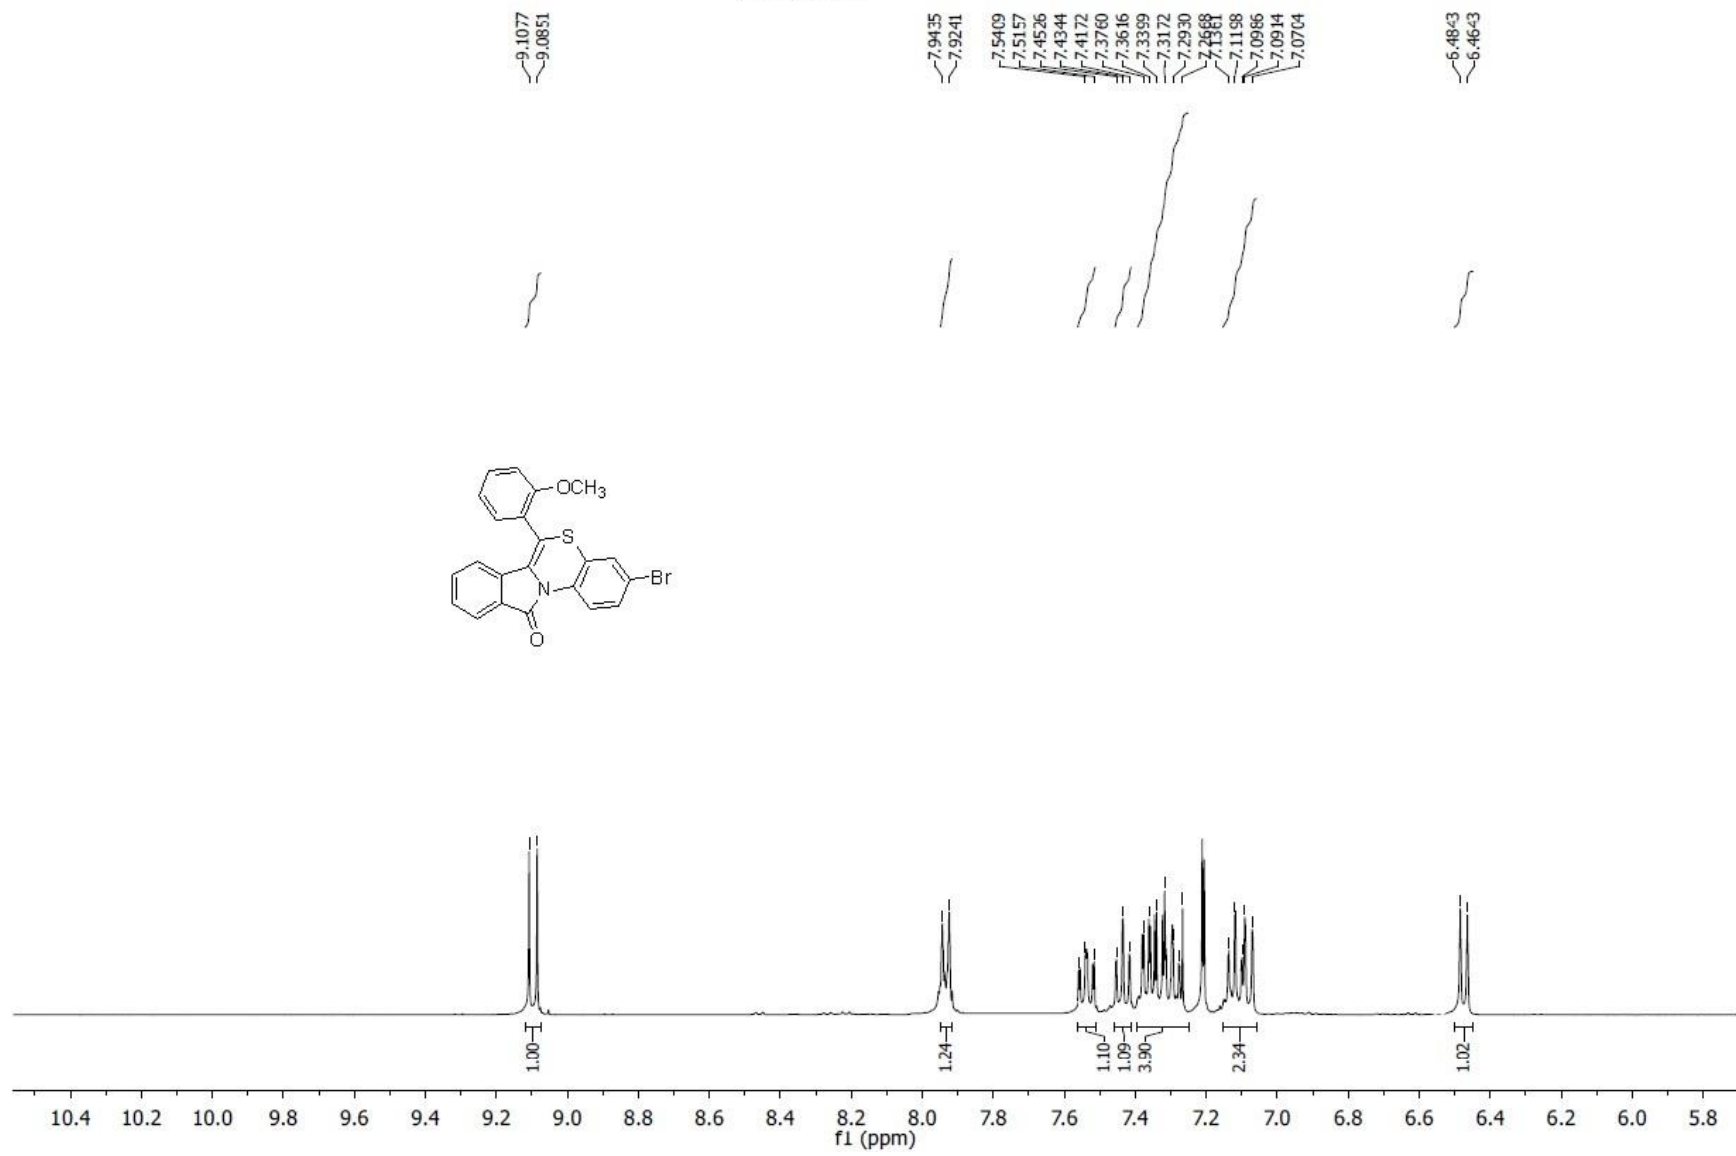



<sup>13</sup>C NMR of 5h

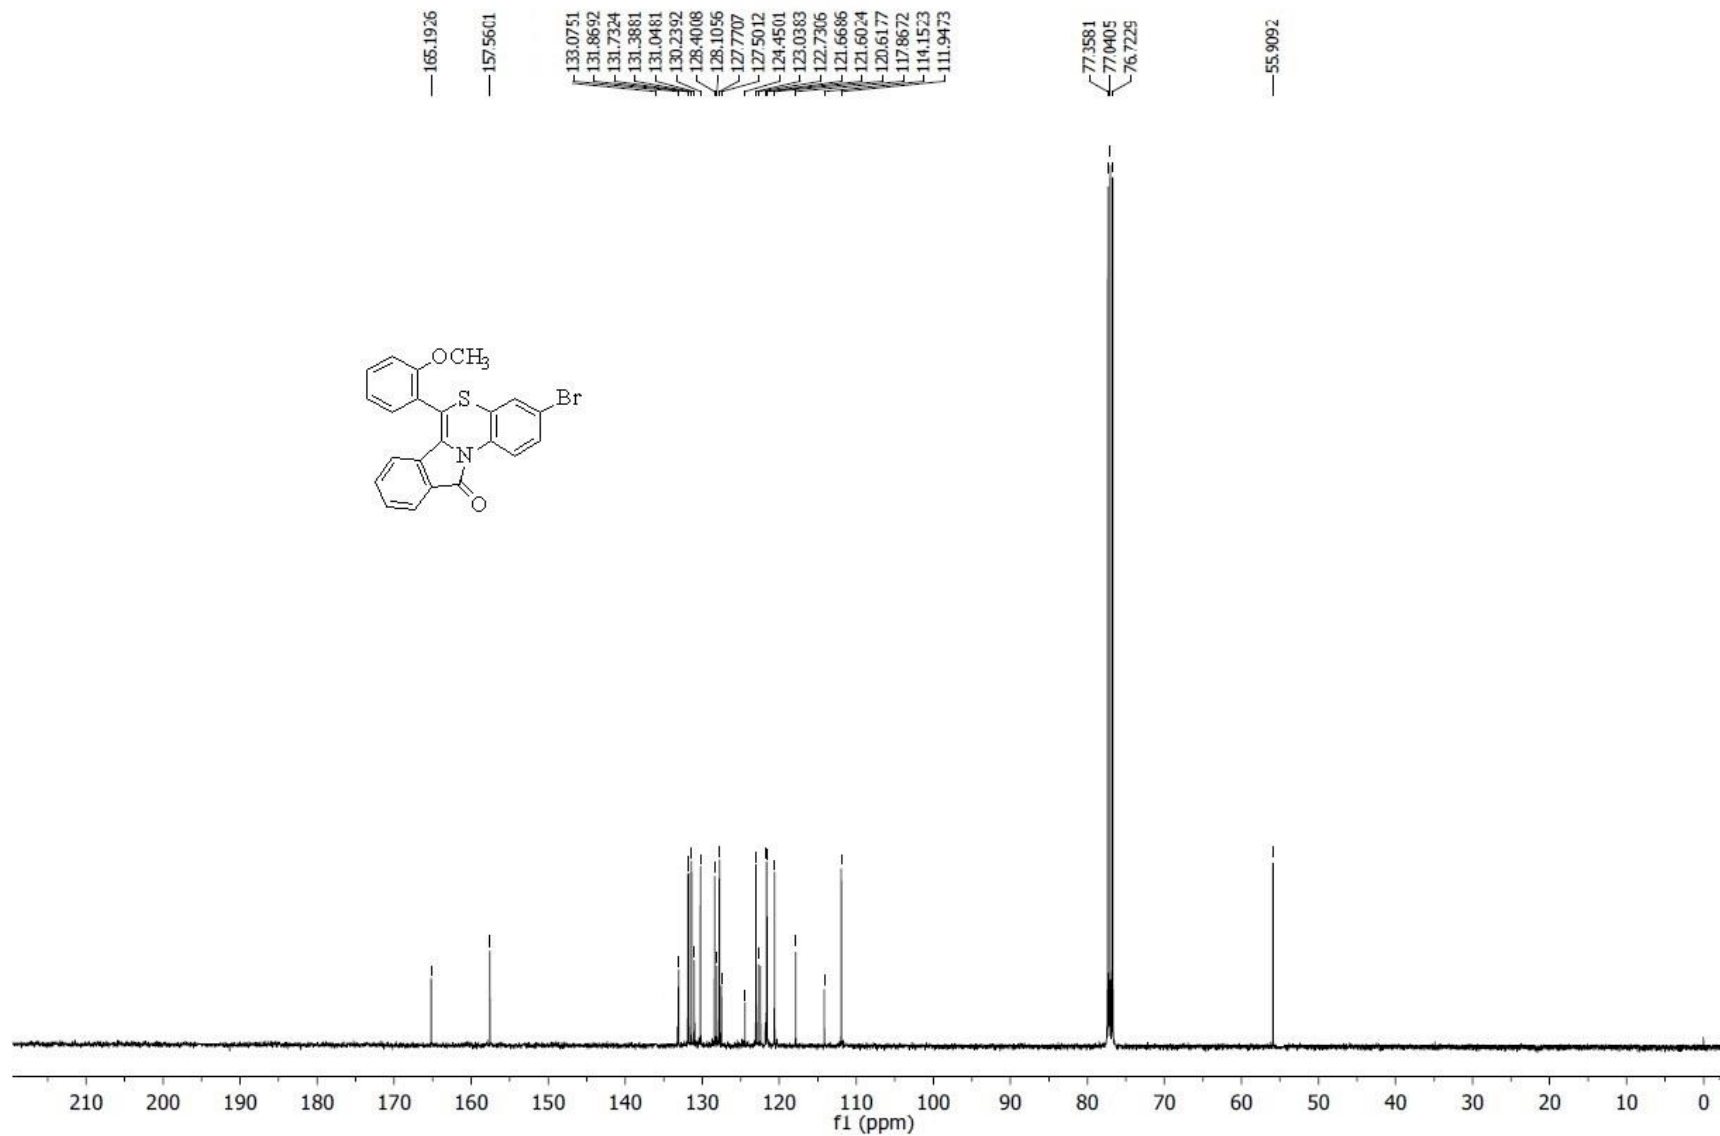

<sup>13</sup>C NMR of 5h

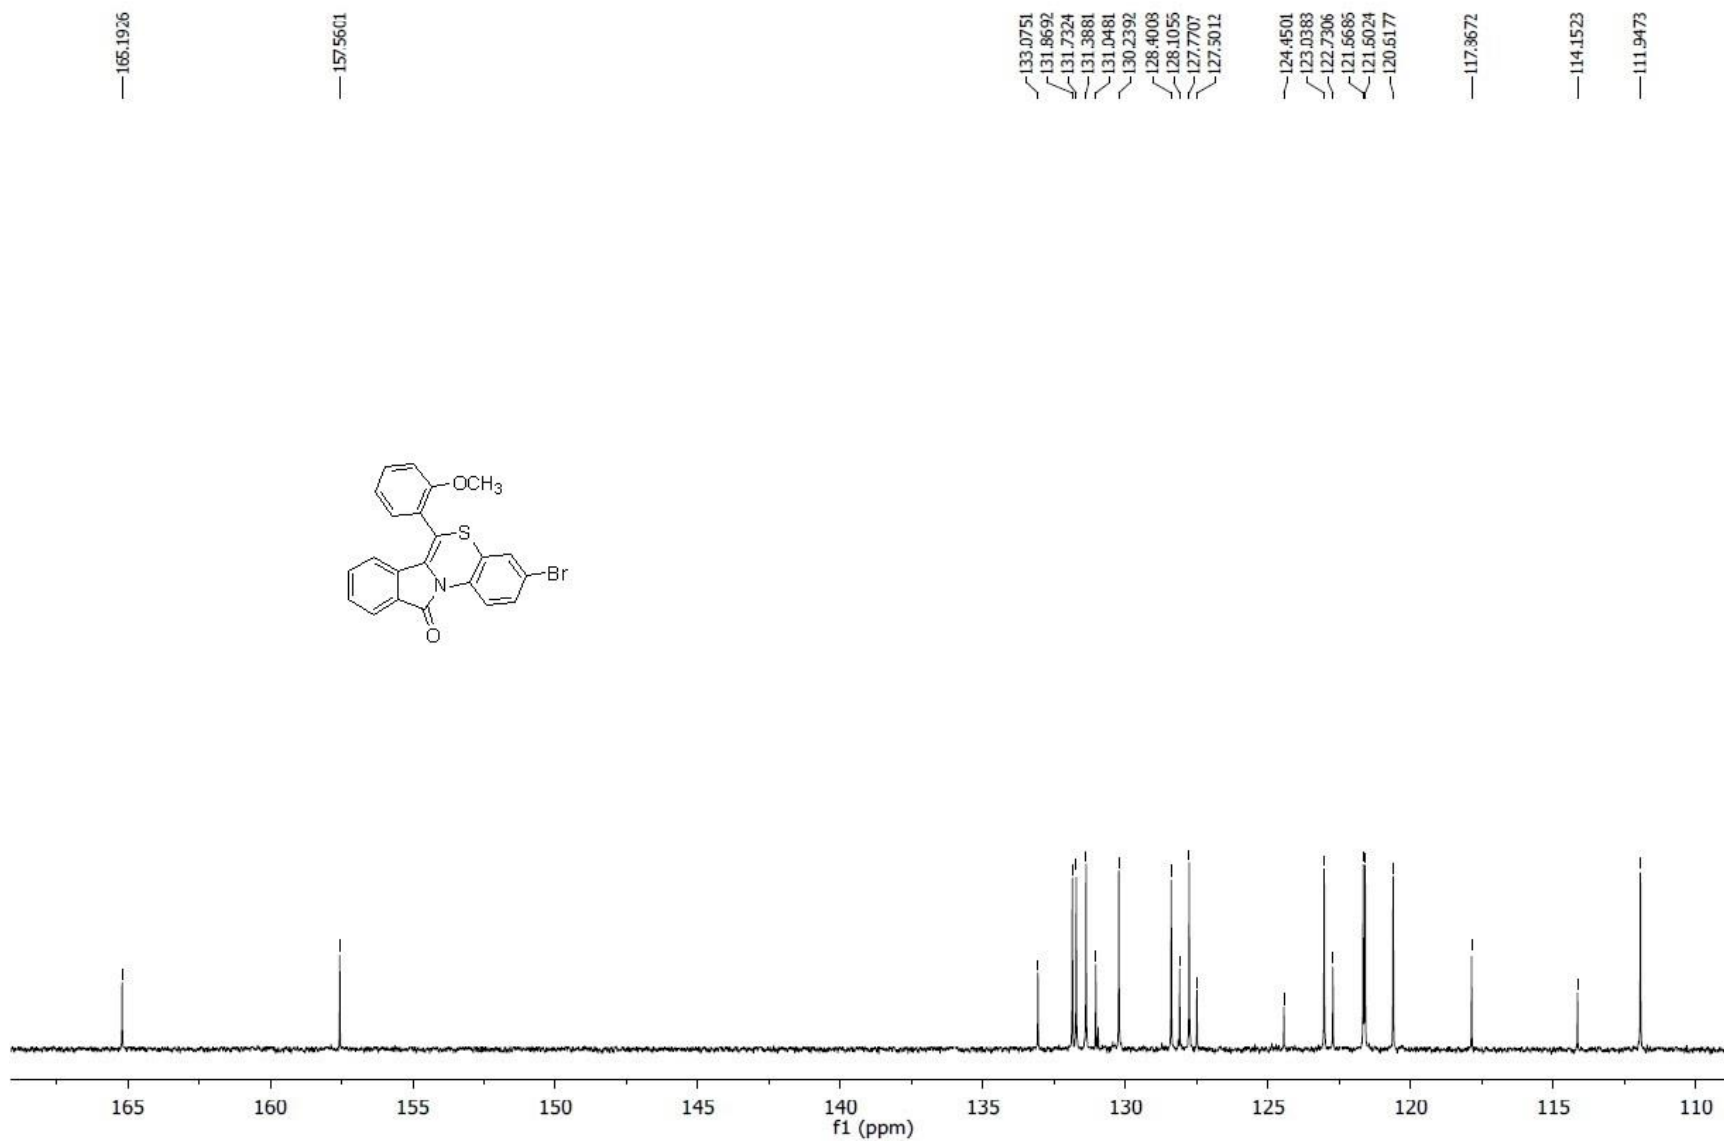

<sup>1</sup>H NMR of 5i

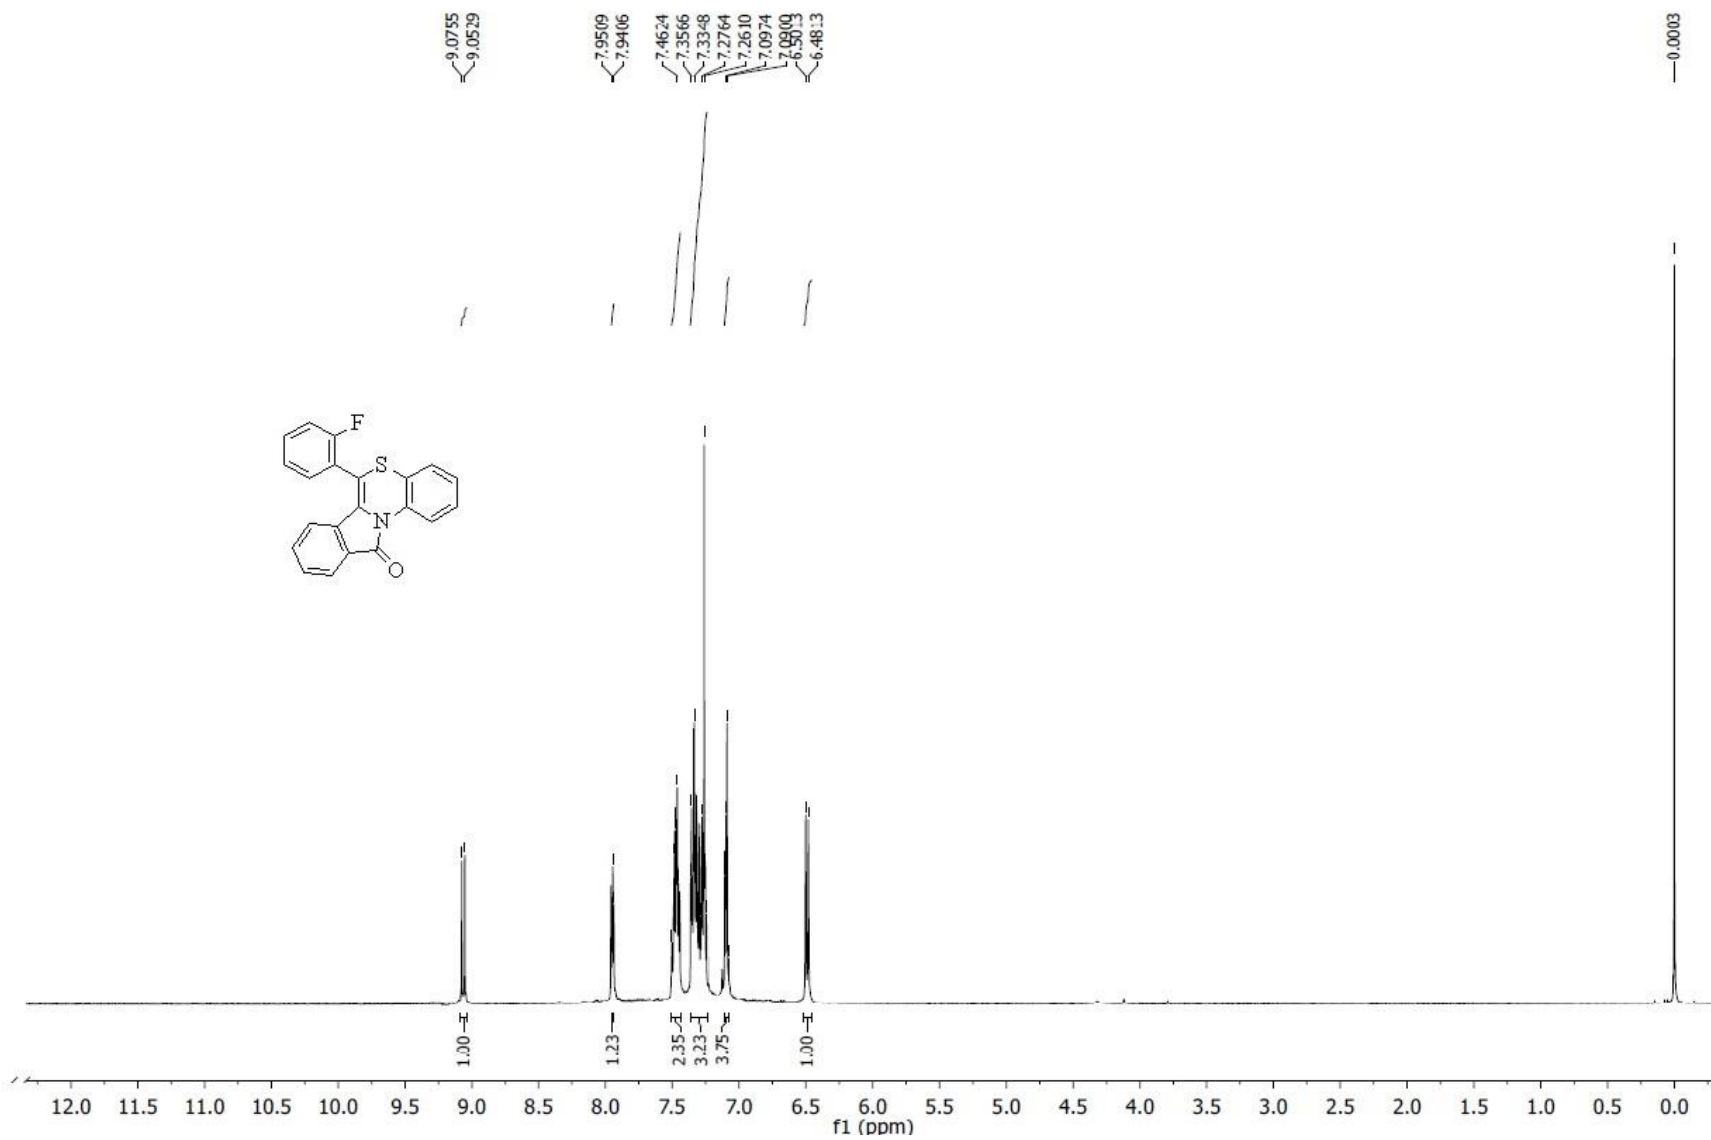

<sup>1</sup>H NMR of 5i

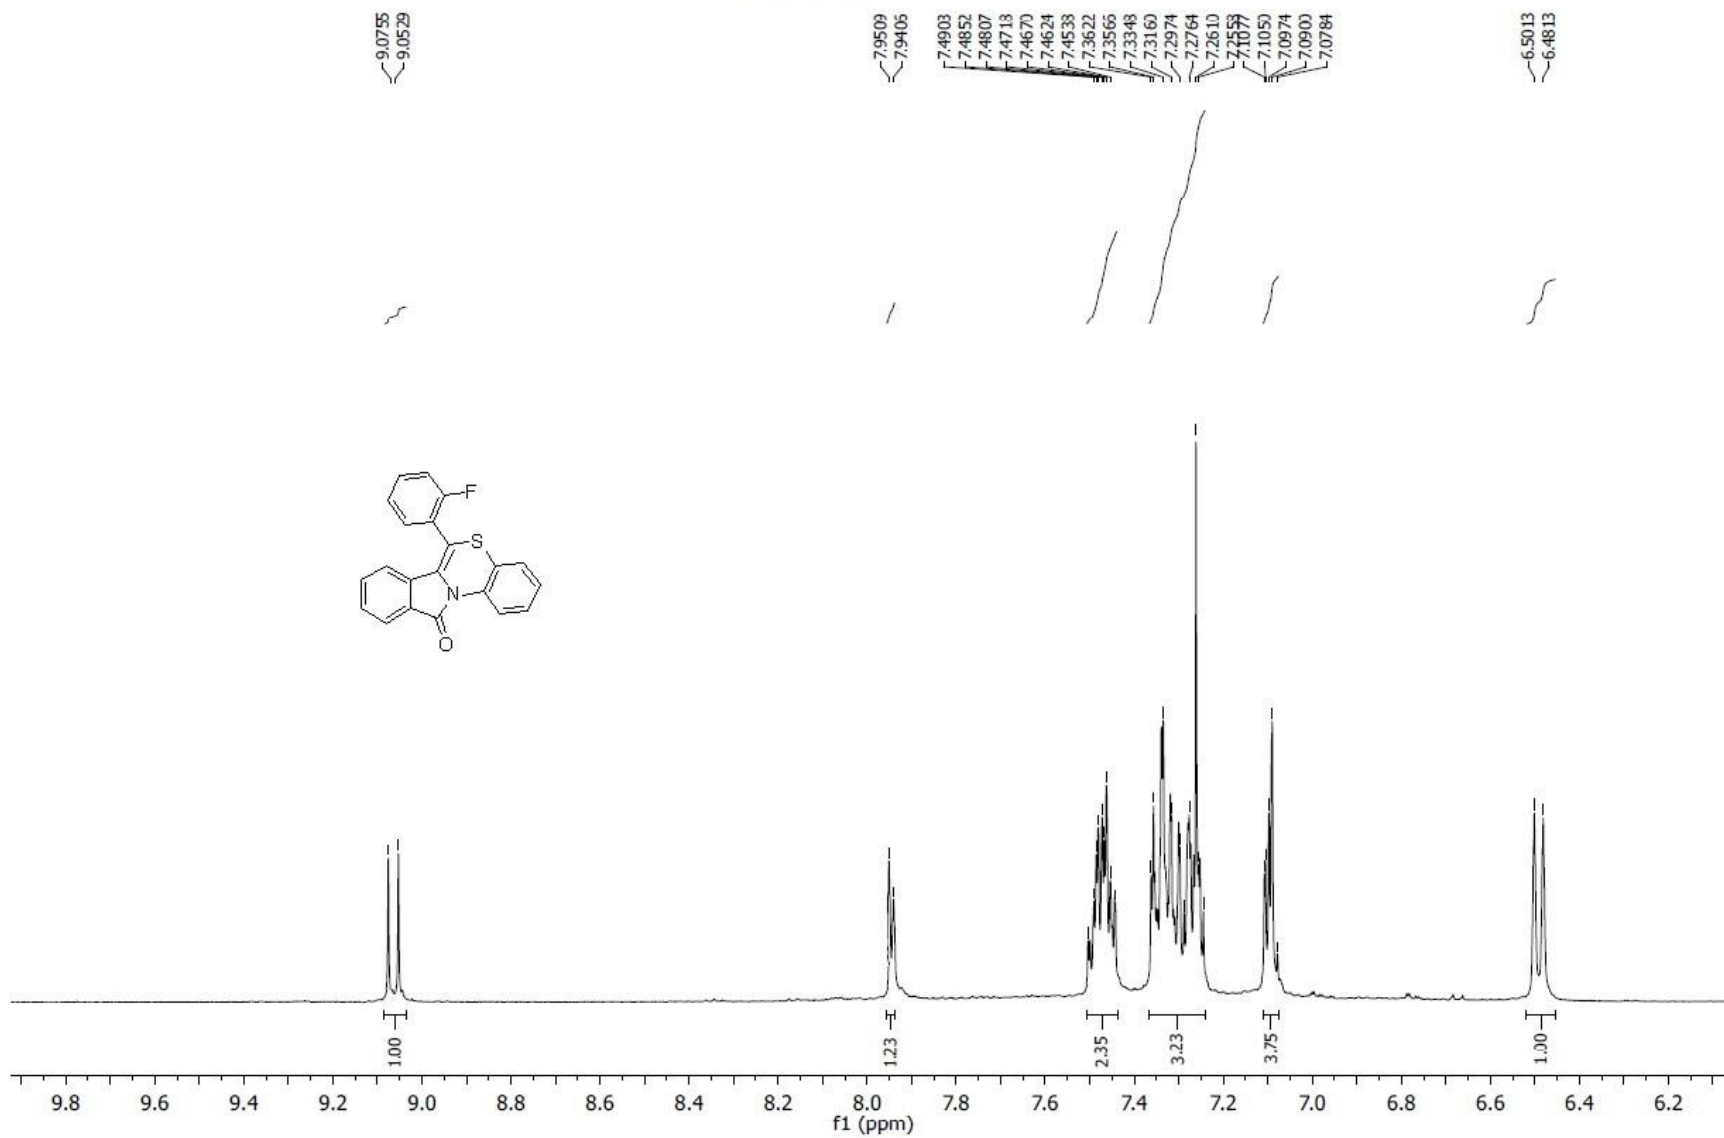

<sup>13</sup>C NMR of 5i

165.2118  
161.4177  
158.9153  
133.8157  
132.9131  
132.3015  
132.2208  
131.8917  
131.8286  
131.8003  
131.7737  
130.7146  
130.5994  
128.9039  
128.6869  
127.8273  
125.4971  
125.4881  
123.2039  
122.2665  
122.0459  
121.2630  
120.6511  
119.6991  
119.4947  
118.0956  
116.9418

77.3413  
77.0227  
76.7053

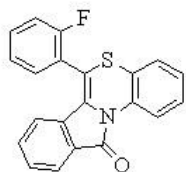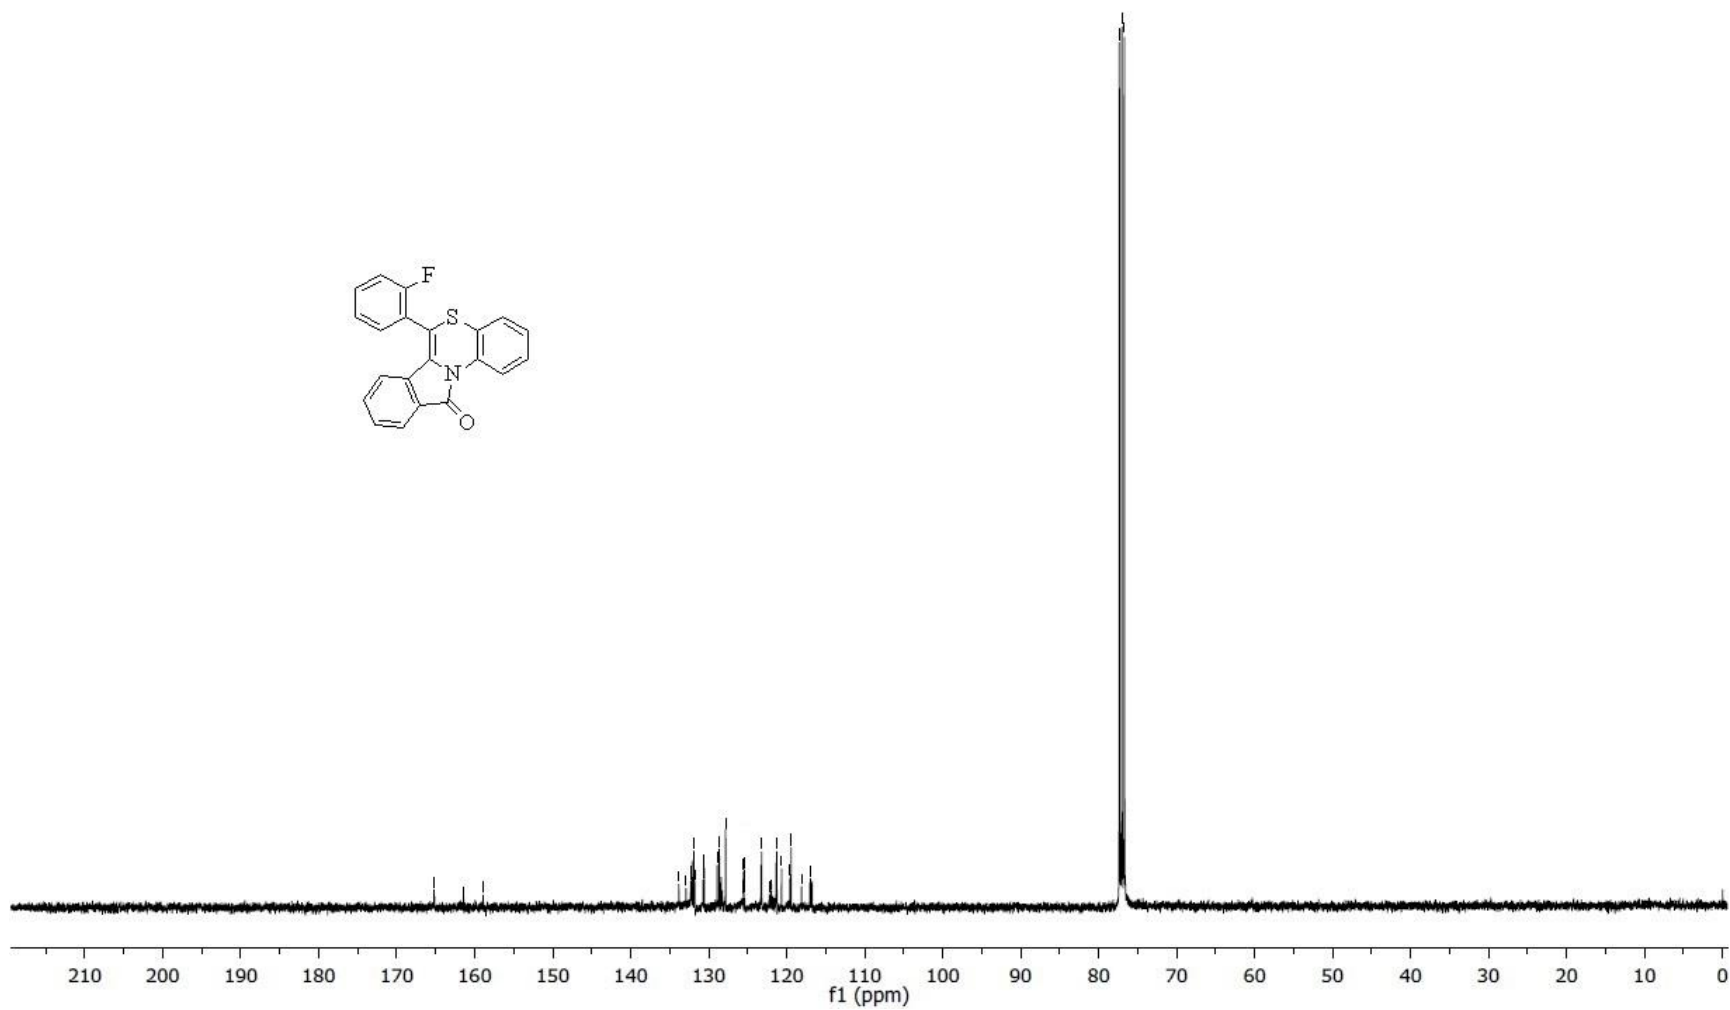

<sup>13</sup>C NMR of 5i

— 165.2118  
— 161.4177  
— 158.9153

133.8157  
132.9131  
132.3015  
132.2208  
131.8917  
131.8286  
131.8103  
131.7737  
130.7146  
130.5594  
128.9039  
128.6369  
127.8273  
125.4971  
125.4581  
123.2039  
122.2065  
122.0459  
121.2630  
120.6511  
119.6091  
119.4347  
118.0956  
116.9418

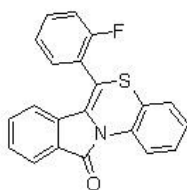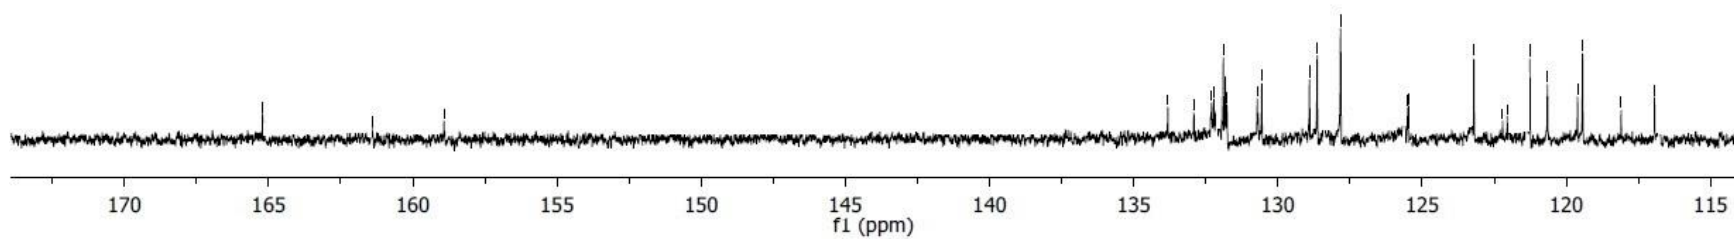

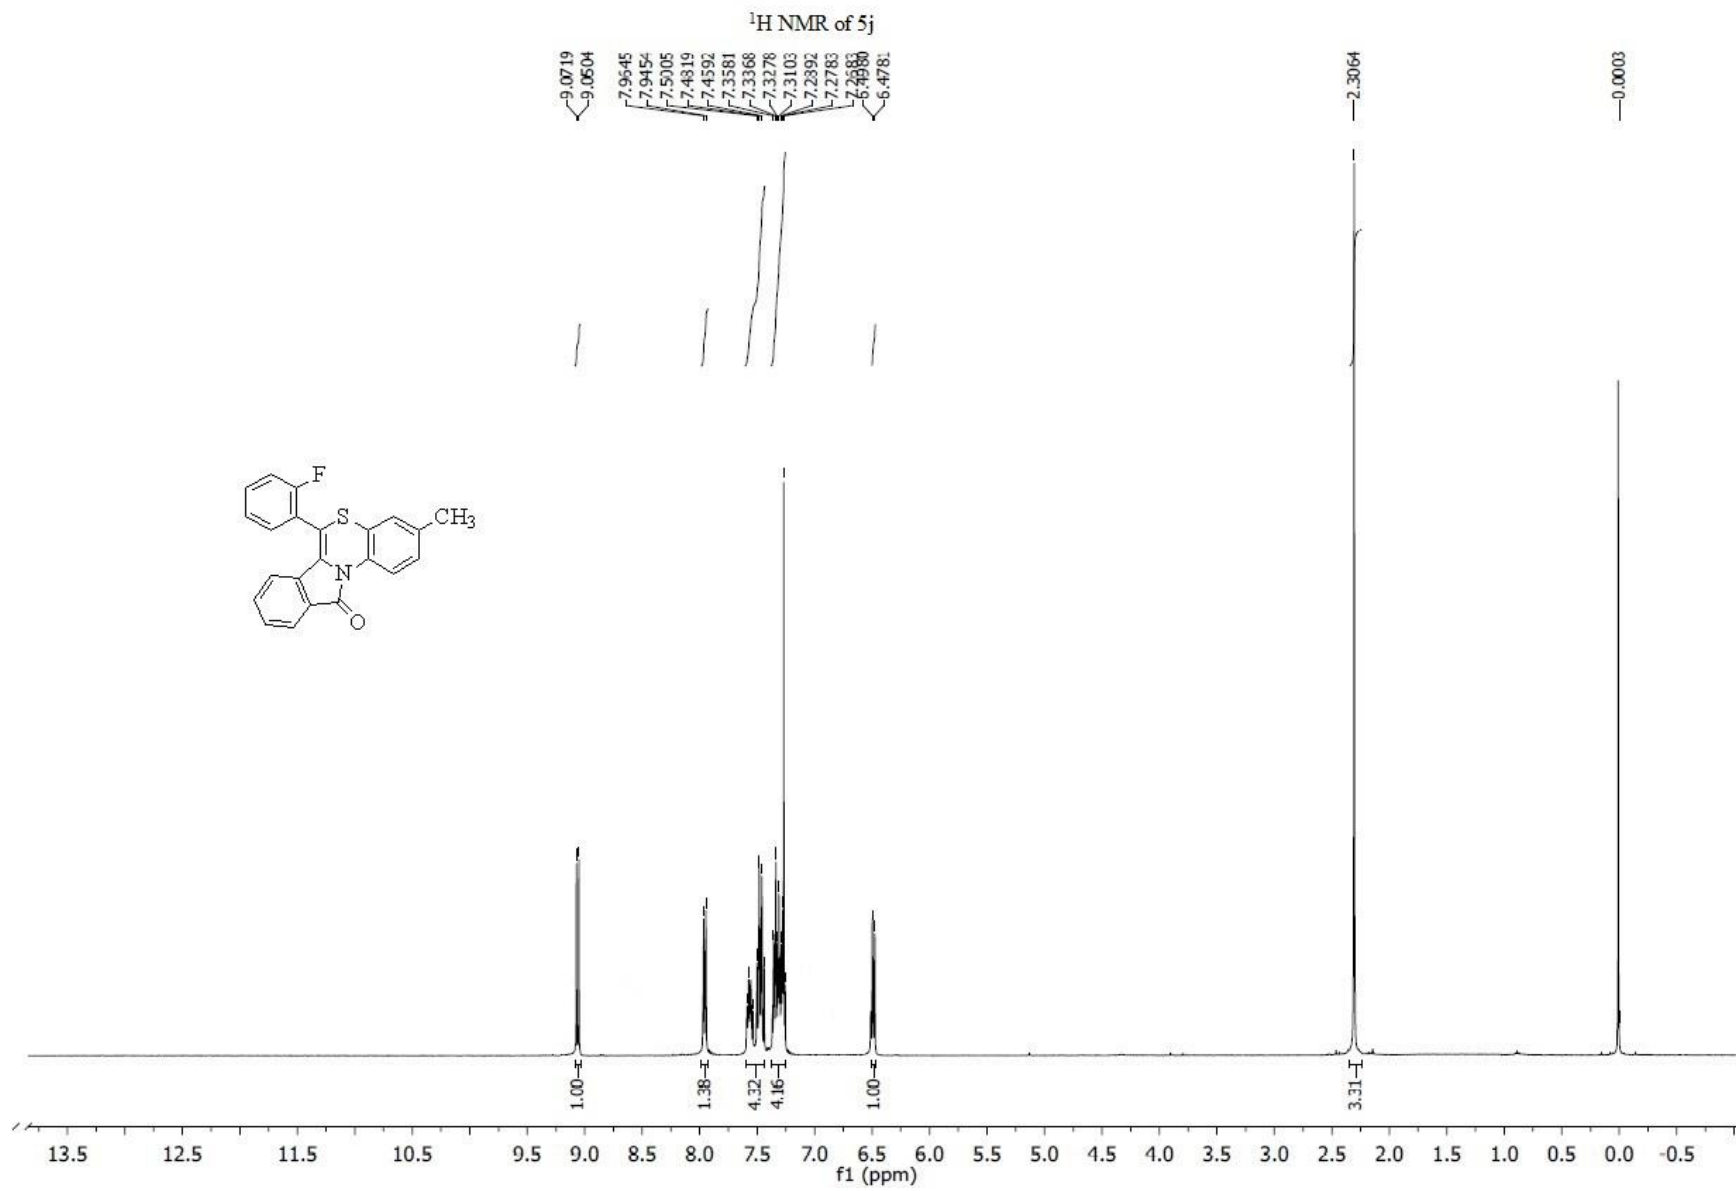

<sup>1</sup>H NMR of 5j

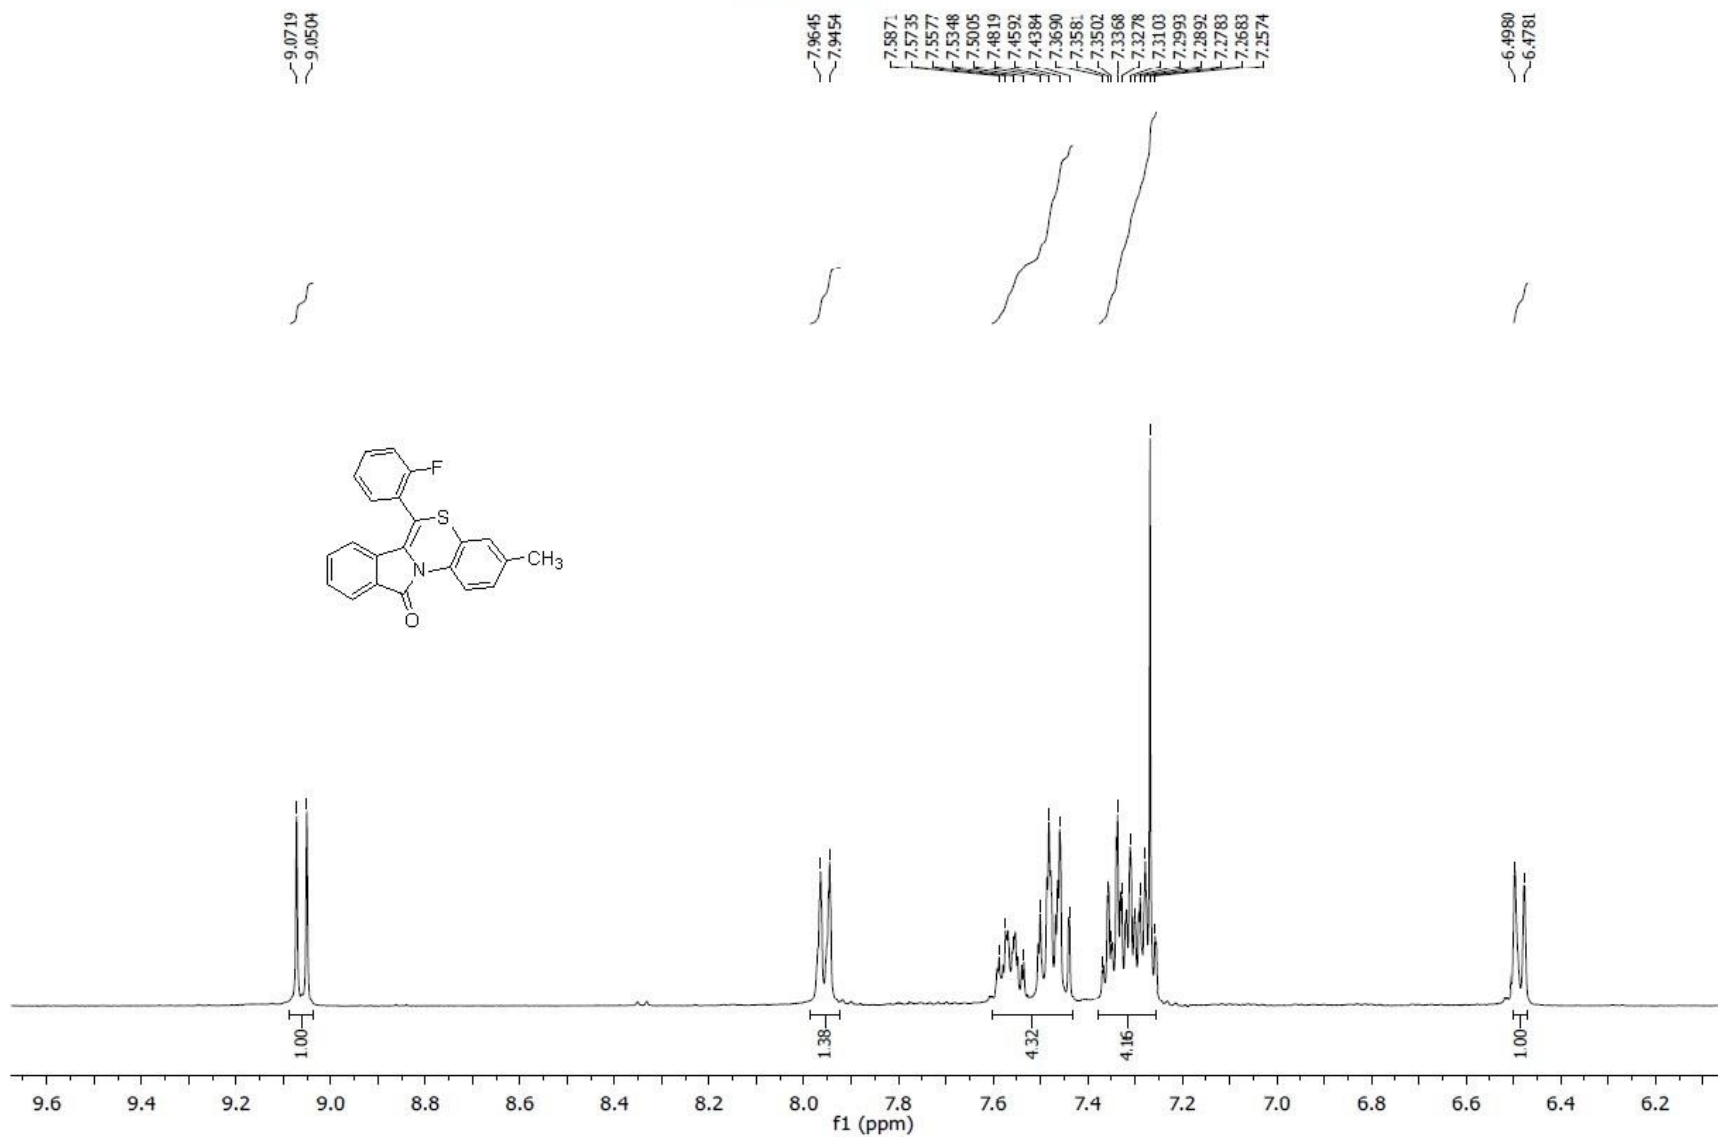



<sup>13</sup>C NMR of 5j

165.0444  
161.4494  
158.9559  
135.4669  
132.0297  
131.9506  
131.8794  
131.8618  
131.7171  
130.7144  
128.5509  
128.4346  
125.8476  
125.3754  
125.3372  
123.1093  
121.2375  
119.2311  
116.9213  
116.7085  
116.1121

77.3305  
77.0131  
76.6955

20.6495

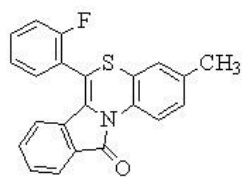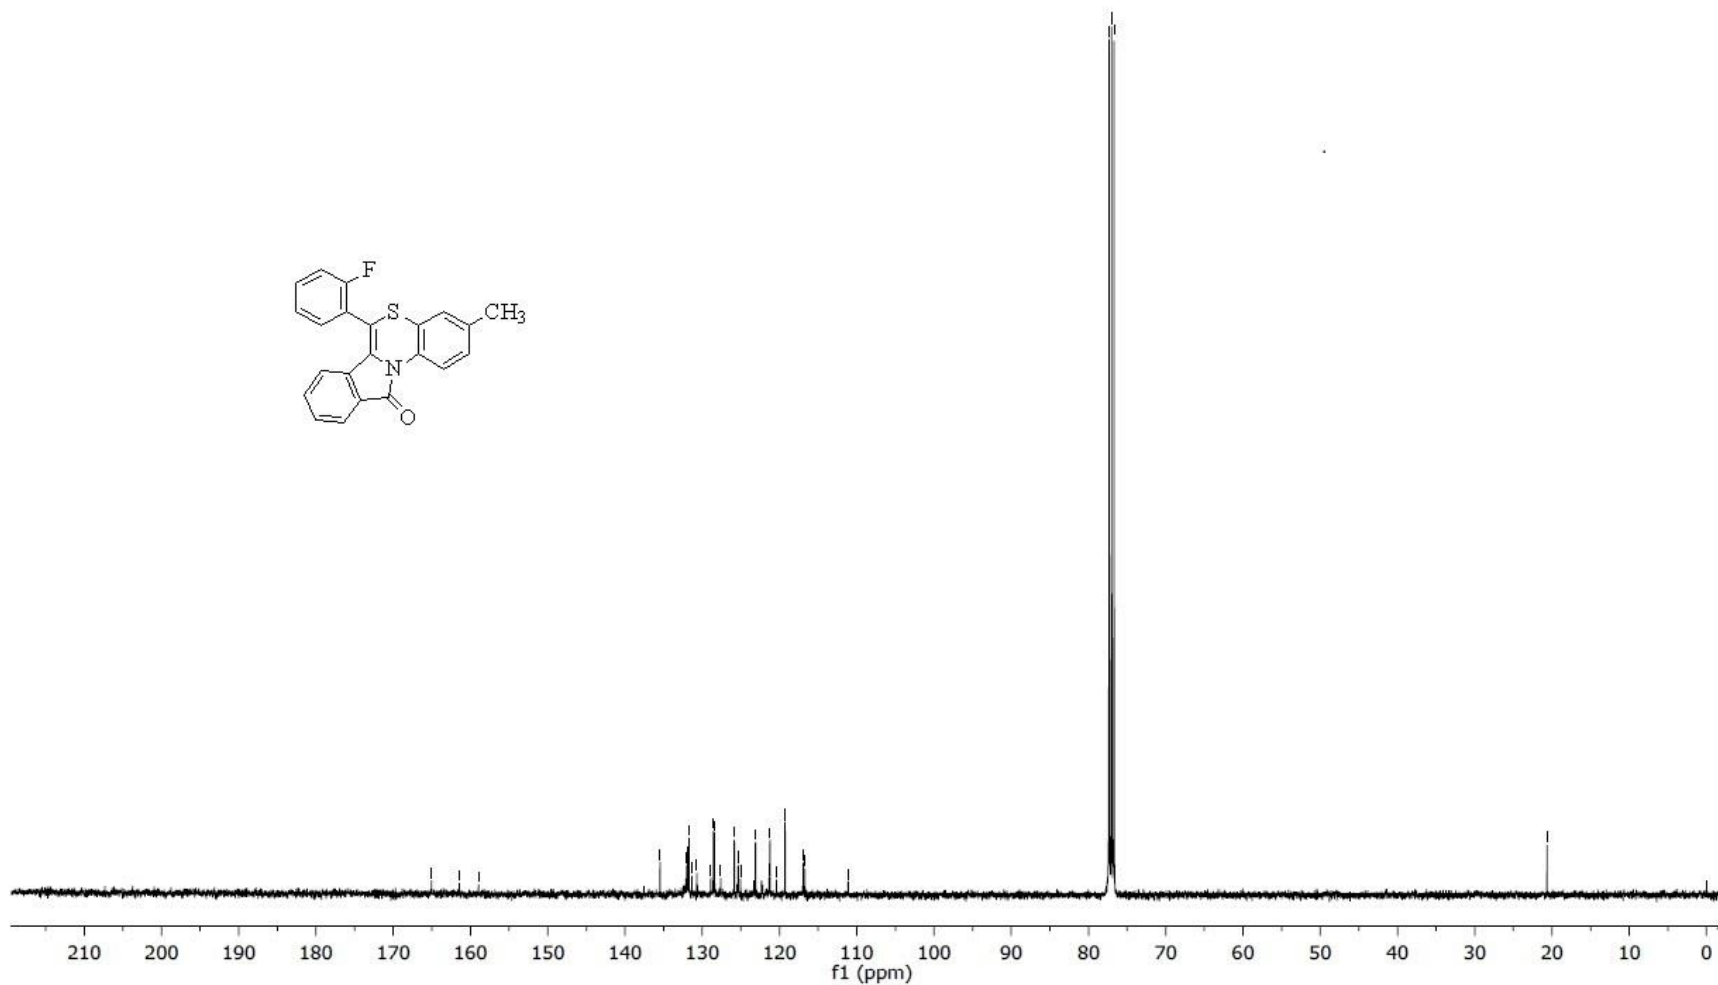

<sup>13</sup>C NMR of 5j

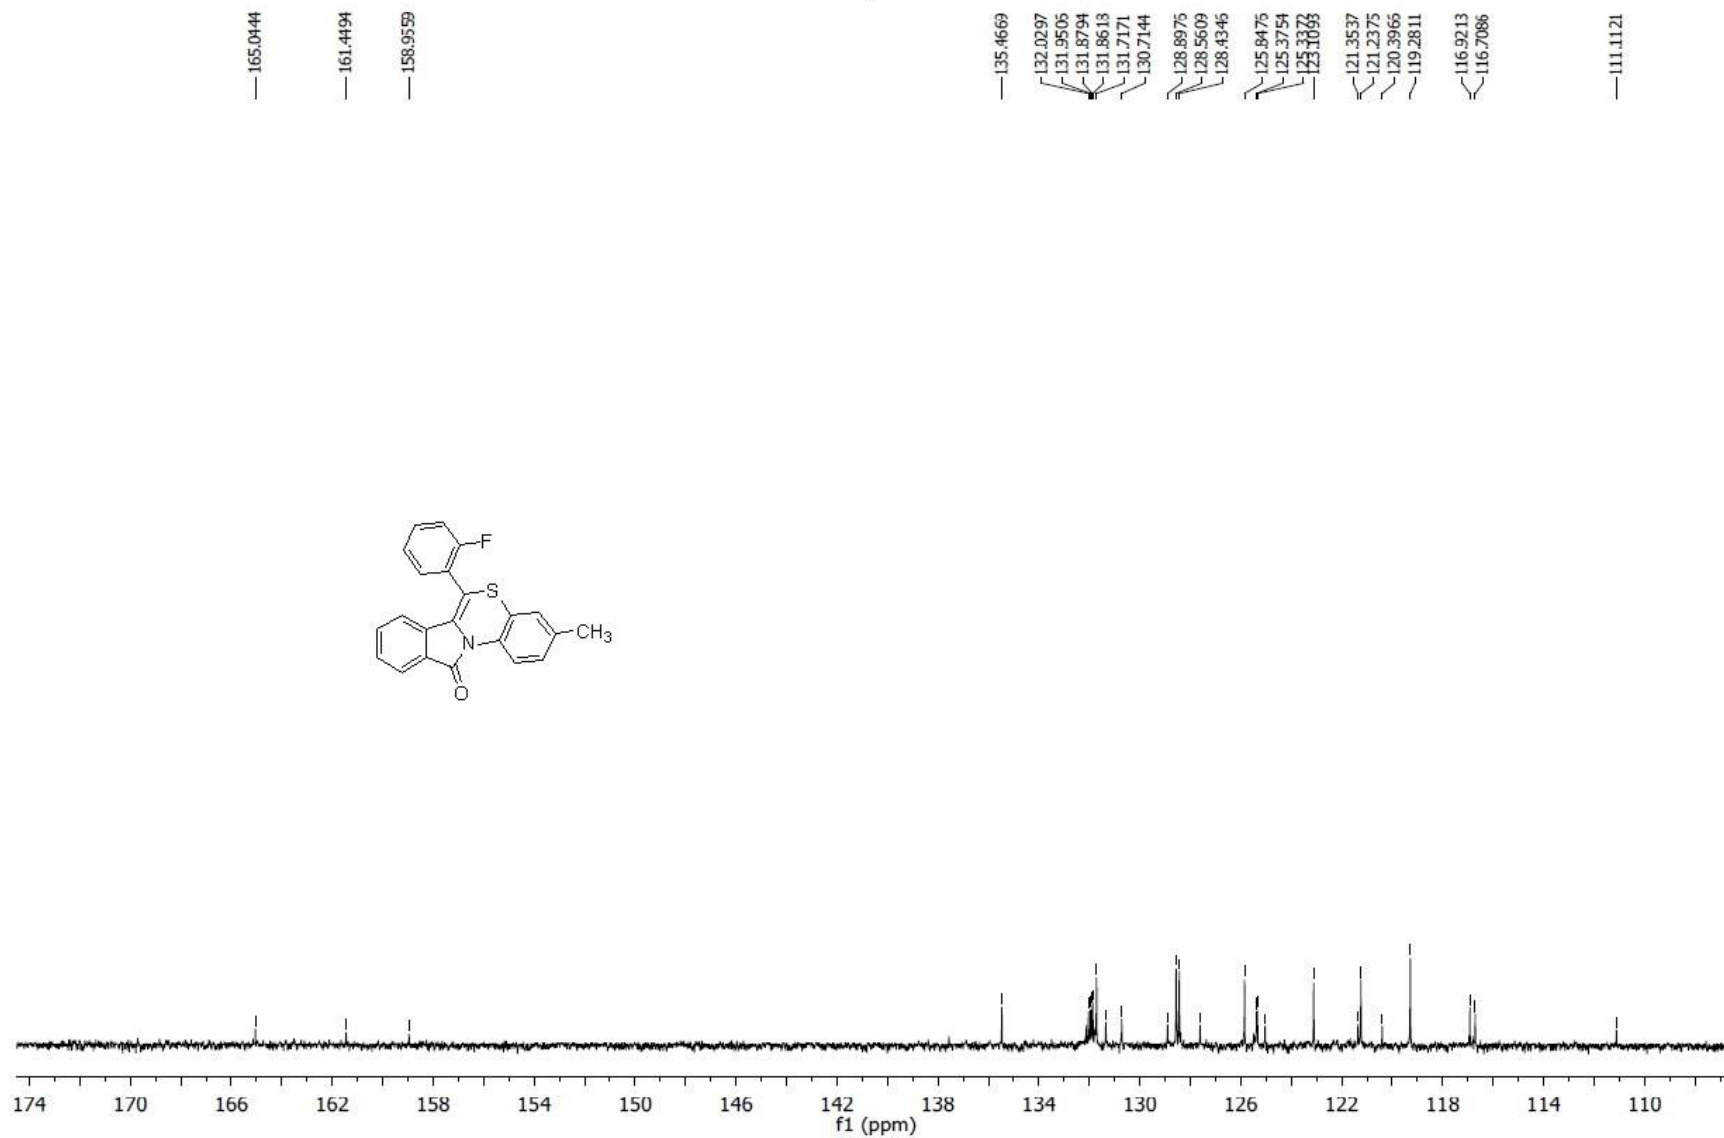

<sup>1</sup>H NMR of 5k

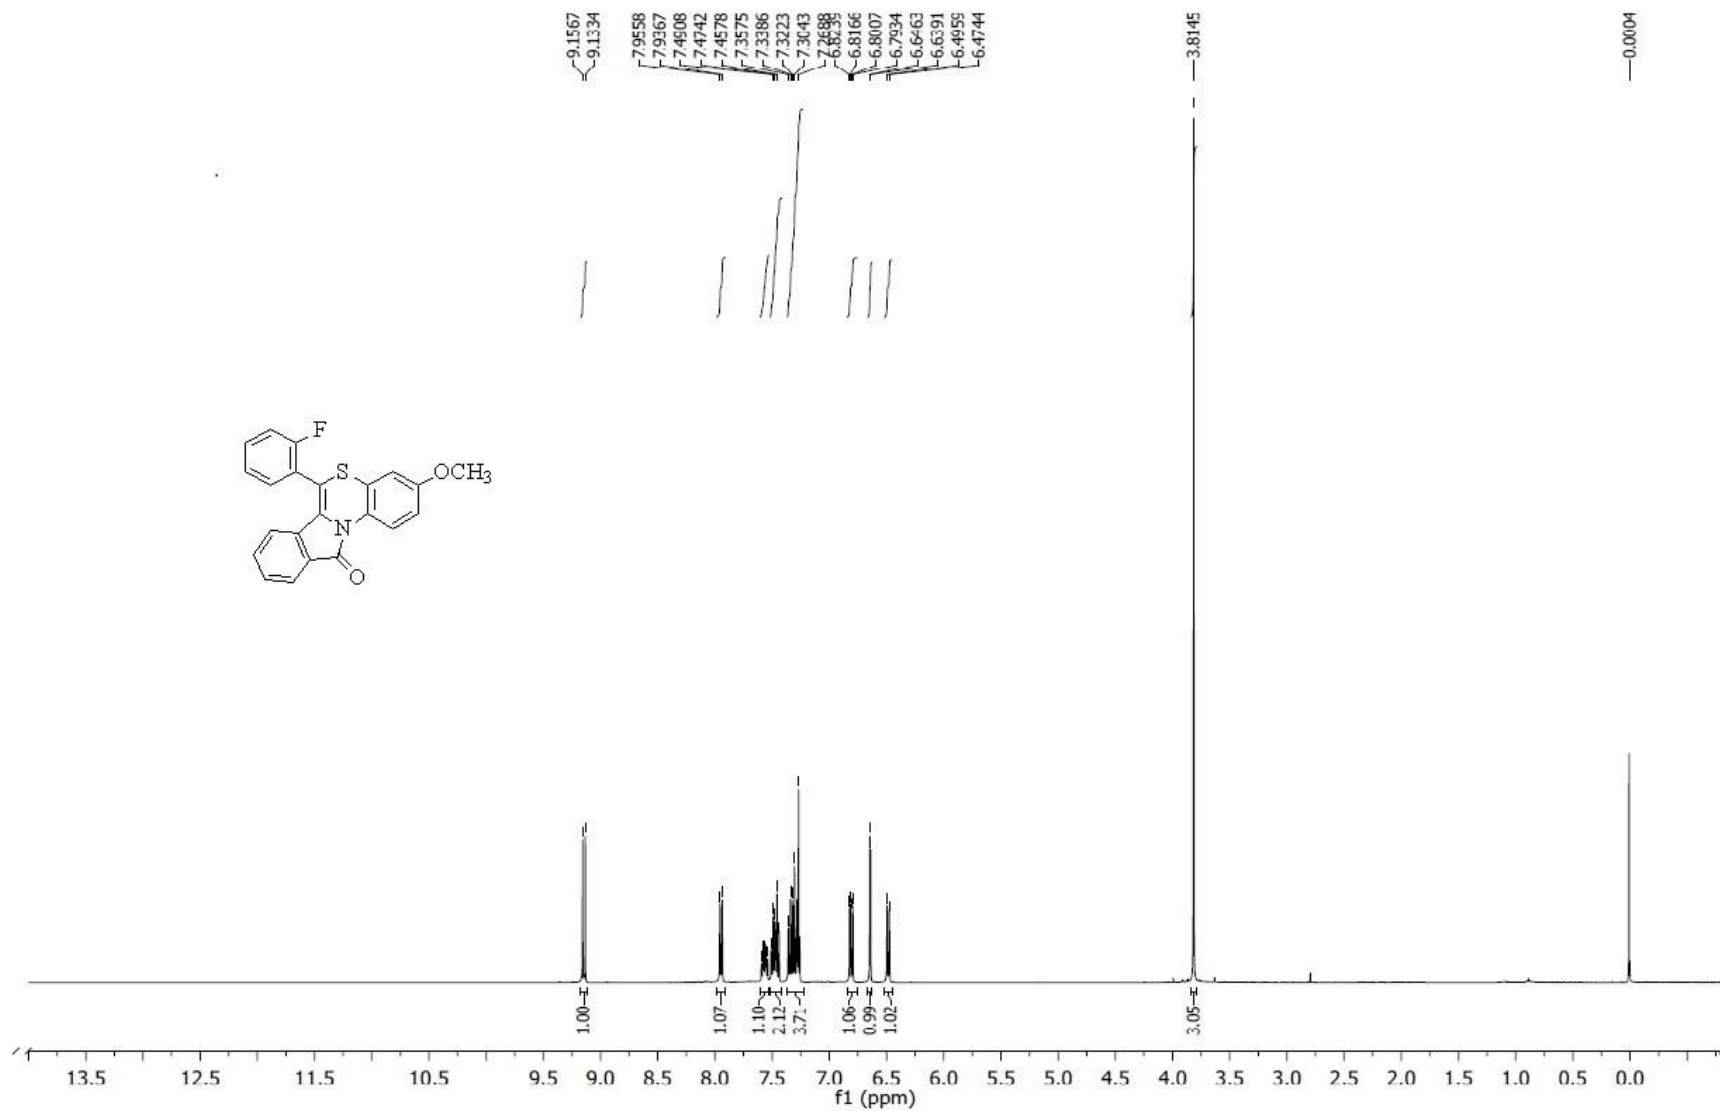

<sup>1</sup>H NMR of 5k

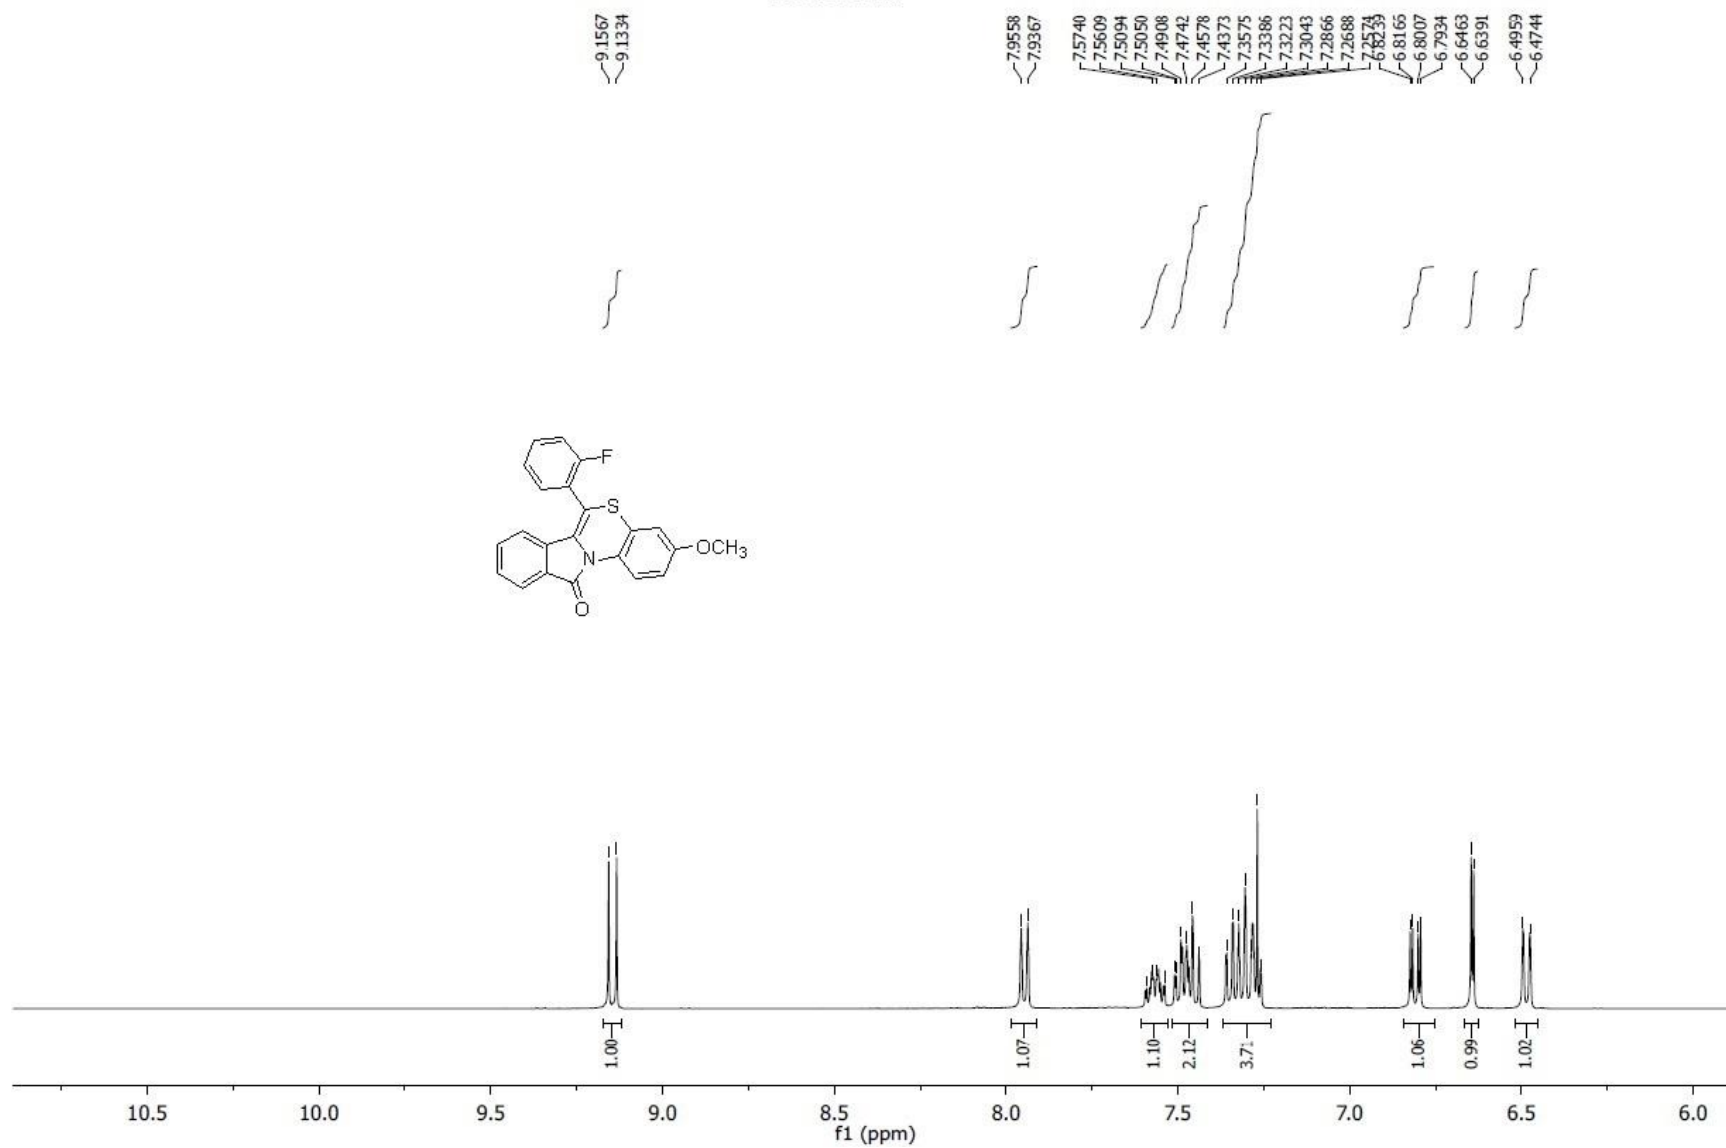

<sup>13</sup>C NMR of 5k

- 164.8429
- 161.4620
- 158.9897
- 156.7016
- 132.0839
- 132.0041
- 131.9203
- 131.9024
- 131.6345
- 130.6540
- 128.6216
- 128.5819
- 128.4970
- 127.2032
- 125.3886
- 125.3510
- 123.0309
- 122.1927
- 122.0336
- 121.2311
- 120.8855
- 120.6409
- 116.9312
- 116.7193
- 112.6357
- 110.8661
- 110.3773
- 77.3350
- 77.0175
- 76.7000
- 55.5585

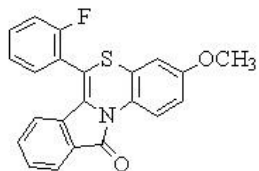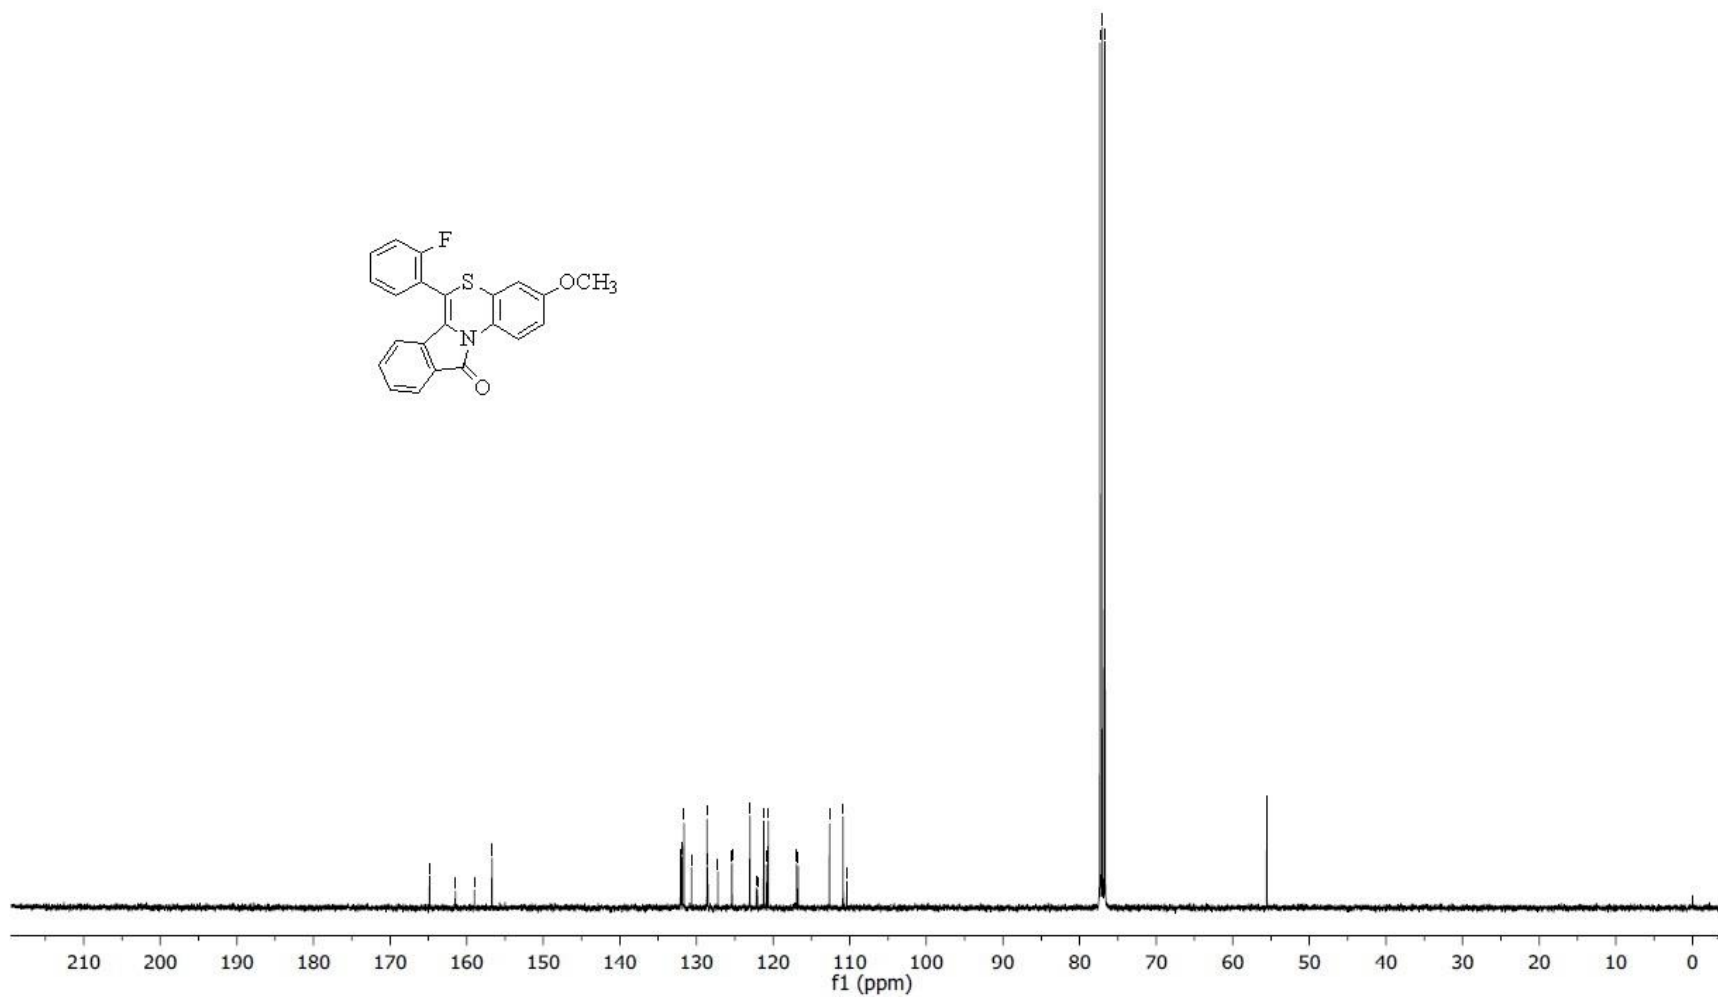

<sup>13</sup>C NMR of 5k

— 164.8429  
— 161.4820  
— 158.9897  
— 156.7016

132.0839  
132.0041  
131.9203  
131.9024  
131.6345  
130.6540  
128.6216  
128.5819  
127.2032  
125.3886  
125.3510  
123.0309  
122.1927  
122.0336  
121.2311  
120.8855  
120.6409  
  
116.9312  
116.7193  
  
112.6357  
110.8651  
110.3773

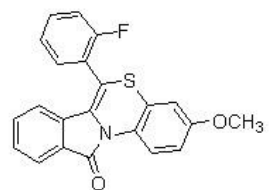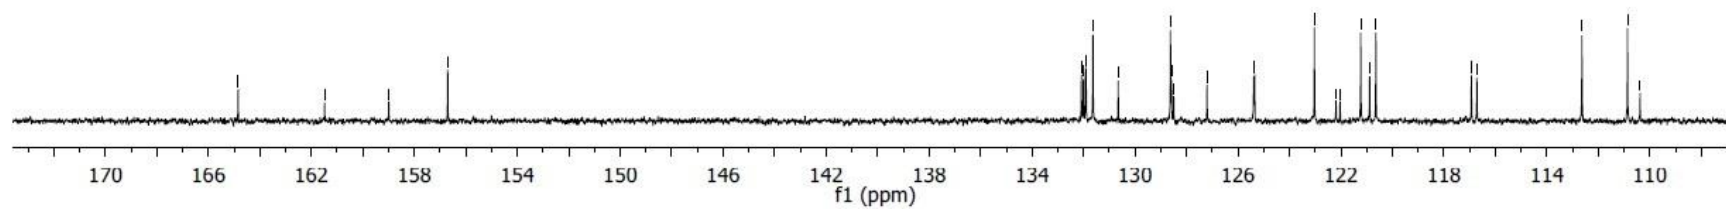

<sup>1</sup>H NMR of 51

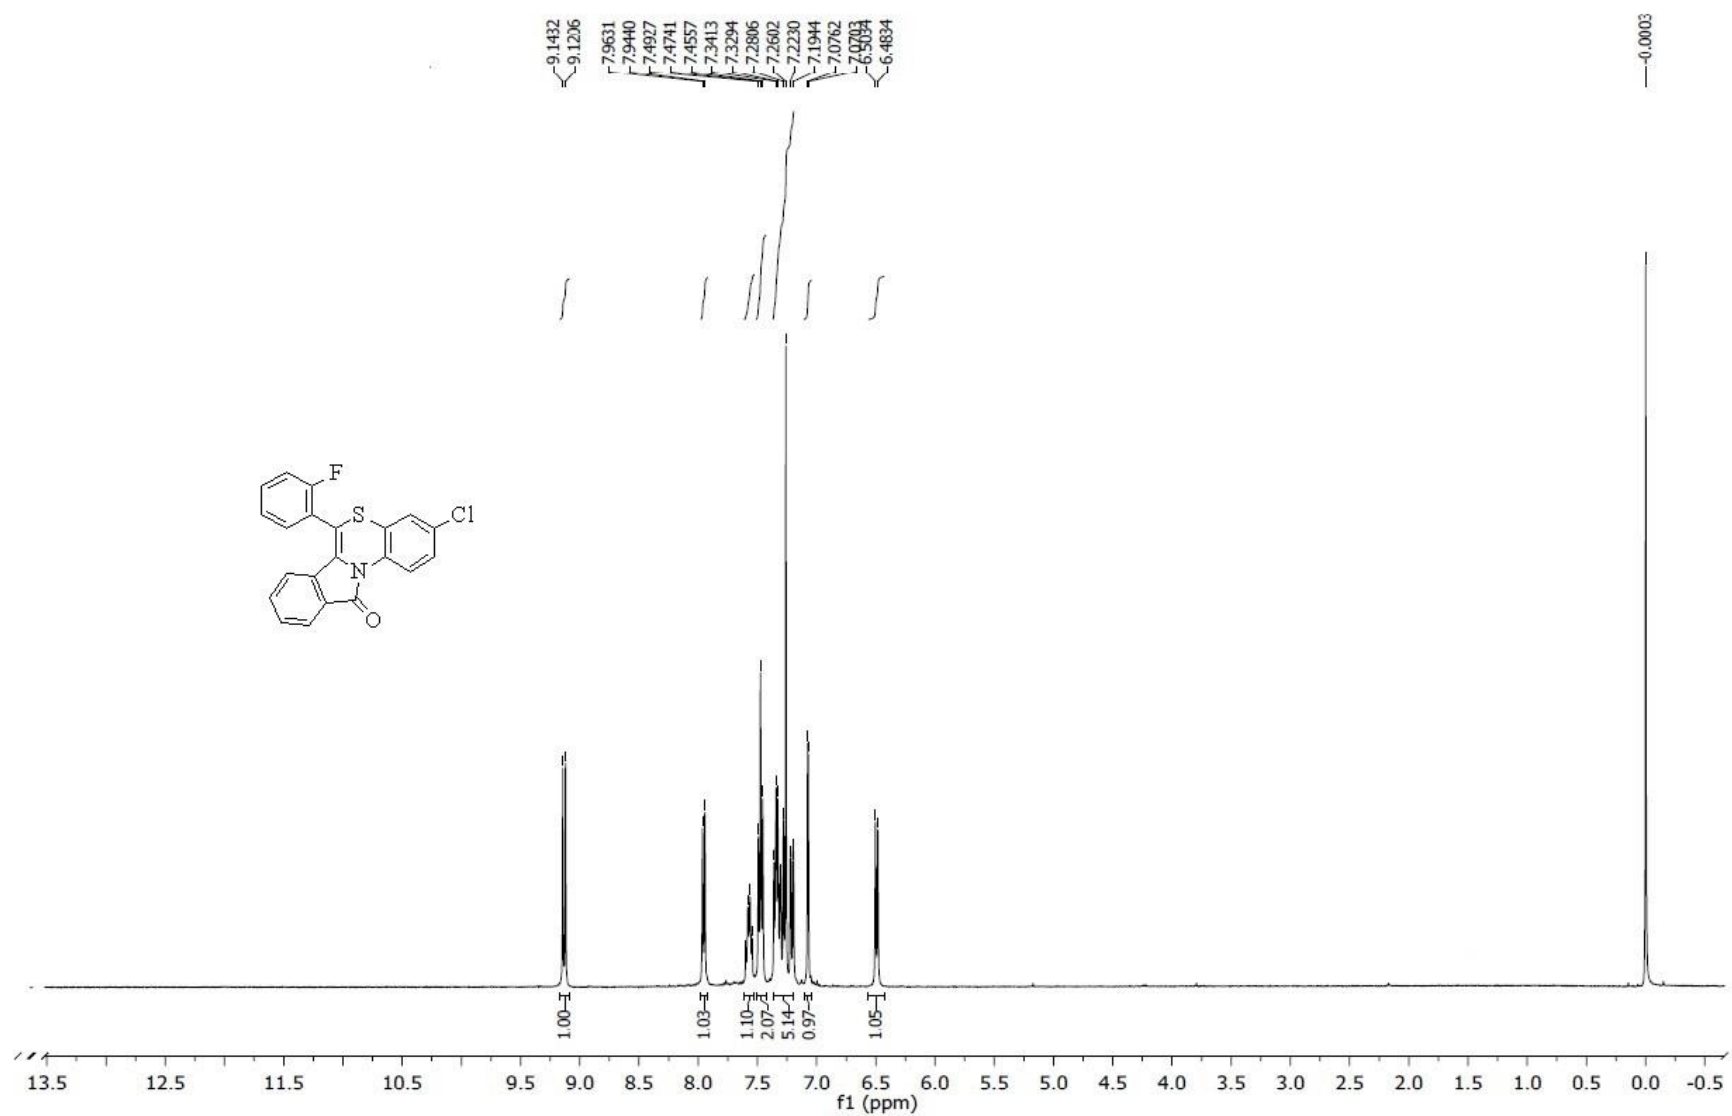

<sup>1</sup>H NMR of 51

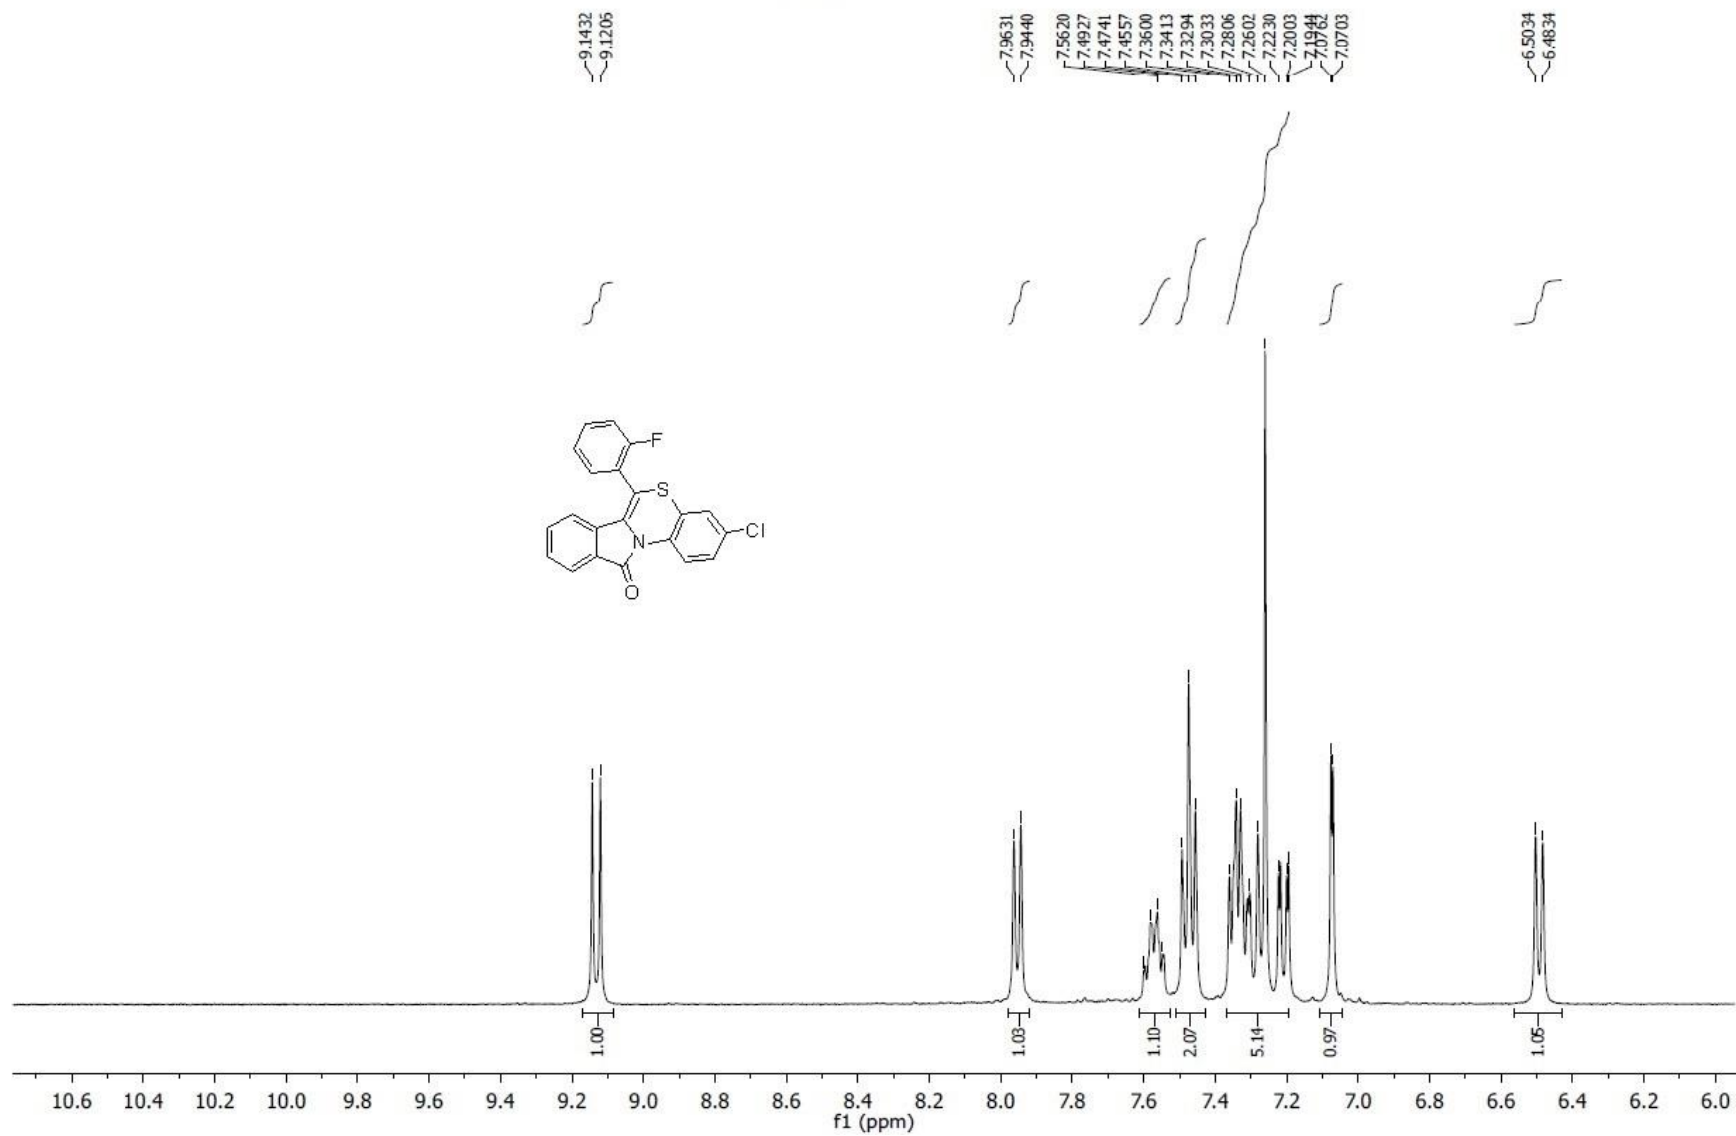



<sup>13</sup>C NMR of 51

165.1387  
161.4187  
158.9243  
132.2517  
132.2121  
132.1144  
131.7933  
131.7760  
130.6026  
128.9009  
128.2592  
127.6137  
125.4879  
125.0381  
123.2630  
121.6604  
121.3535  
120.3865  
117.0144  
116.8032  
77.3275  
77.0100  
76.6925

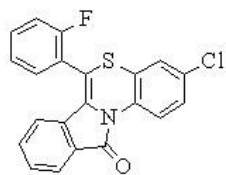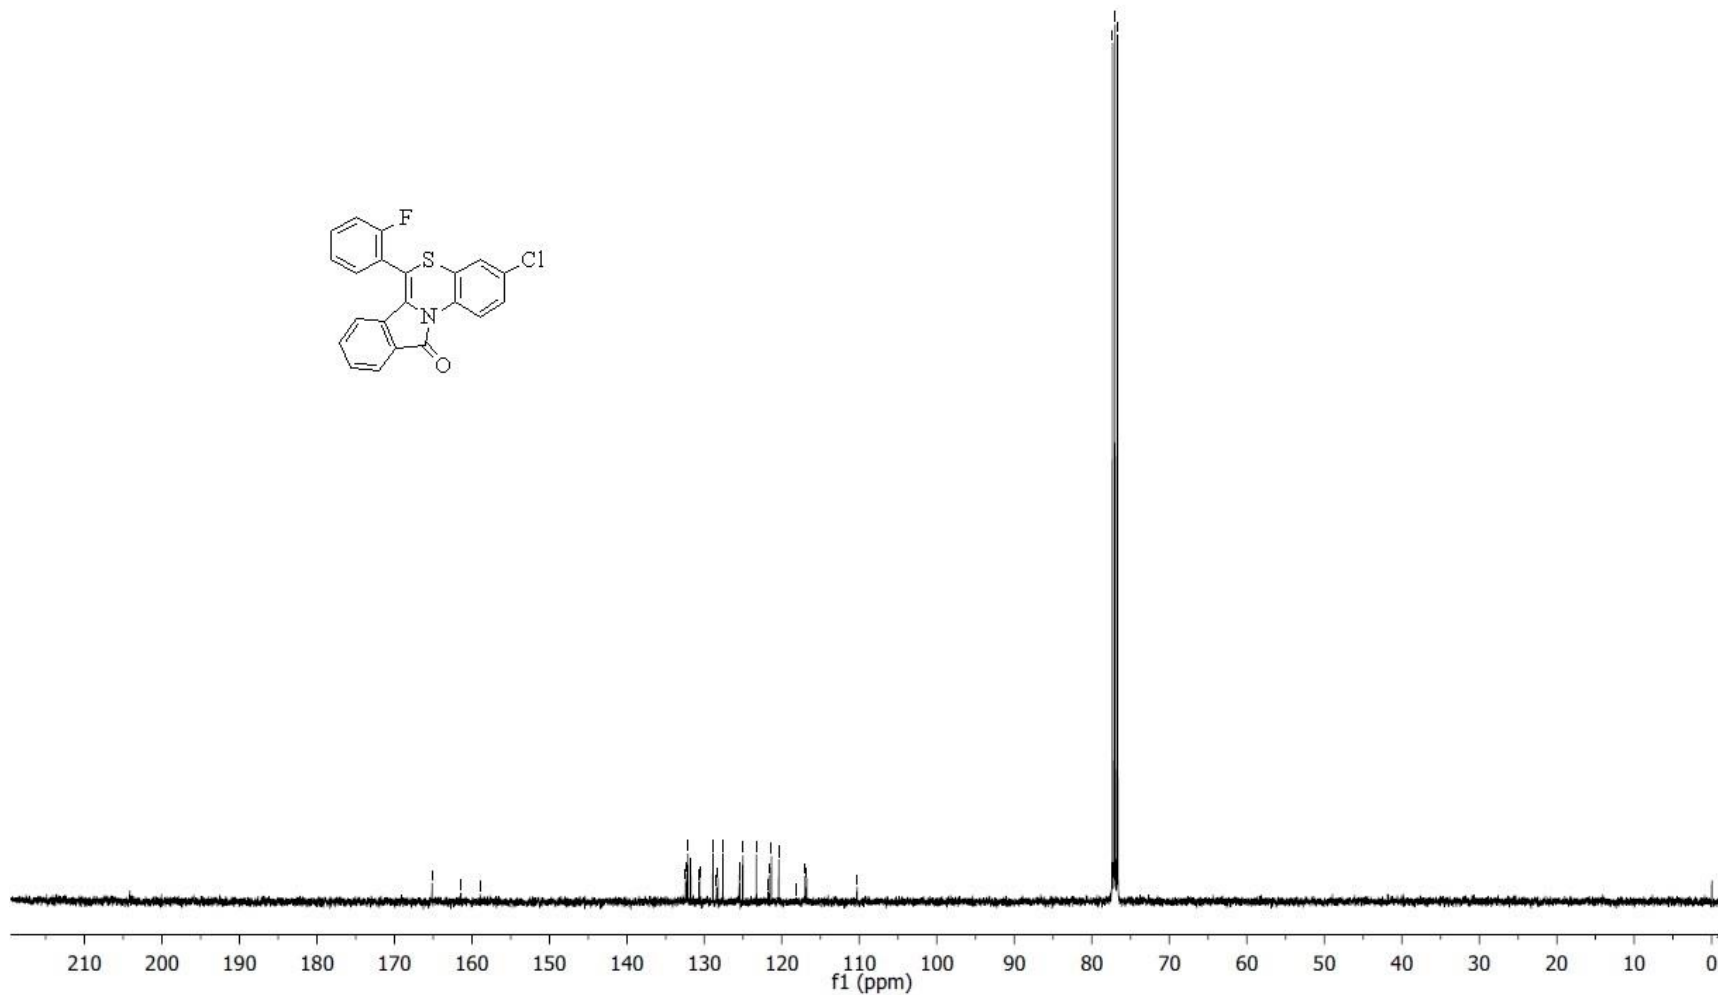

<sup>13</sup>C NMR of 51

— 165.1387  
— 161.4187  
— 158.9243

132.4356  
132.2917  
132.2121  
132.1144  
131.7933  
131.7760  
130.7032  
130.6026  
128.9009  
128.4381  
128.2592  
127.6137  
125.4879  
125.4981  
125.2930  
121.7959  
121.6604  
121.3535  
120.3965  
118.1728  
117.0144  
116.8032

— 110.3015

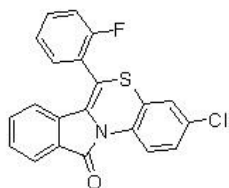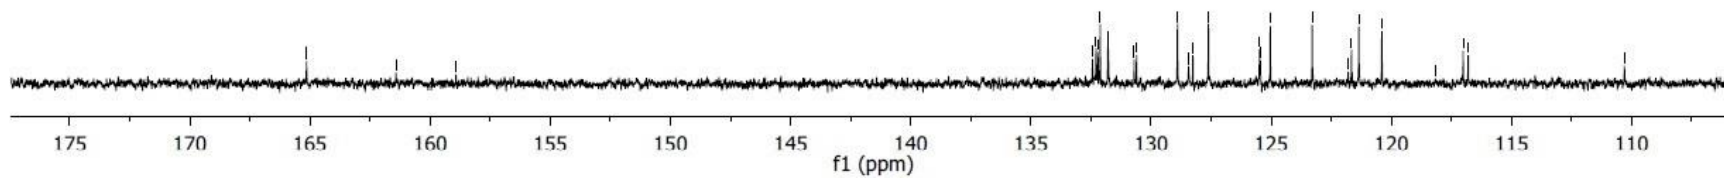

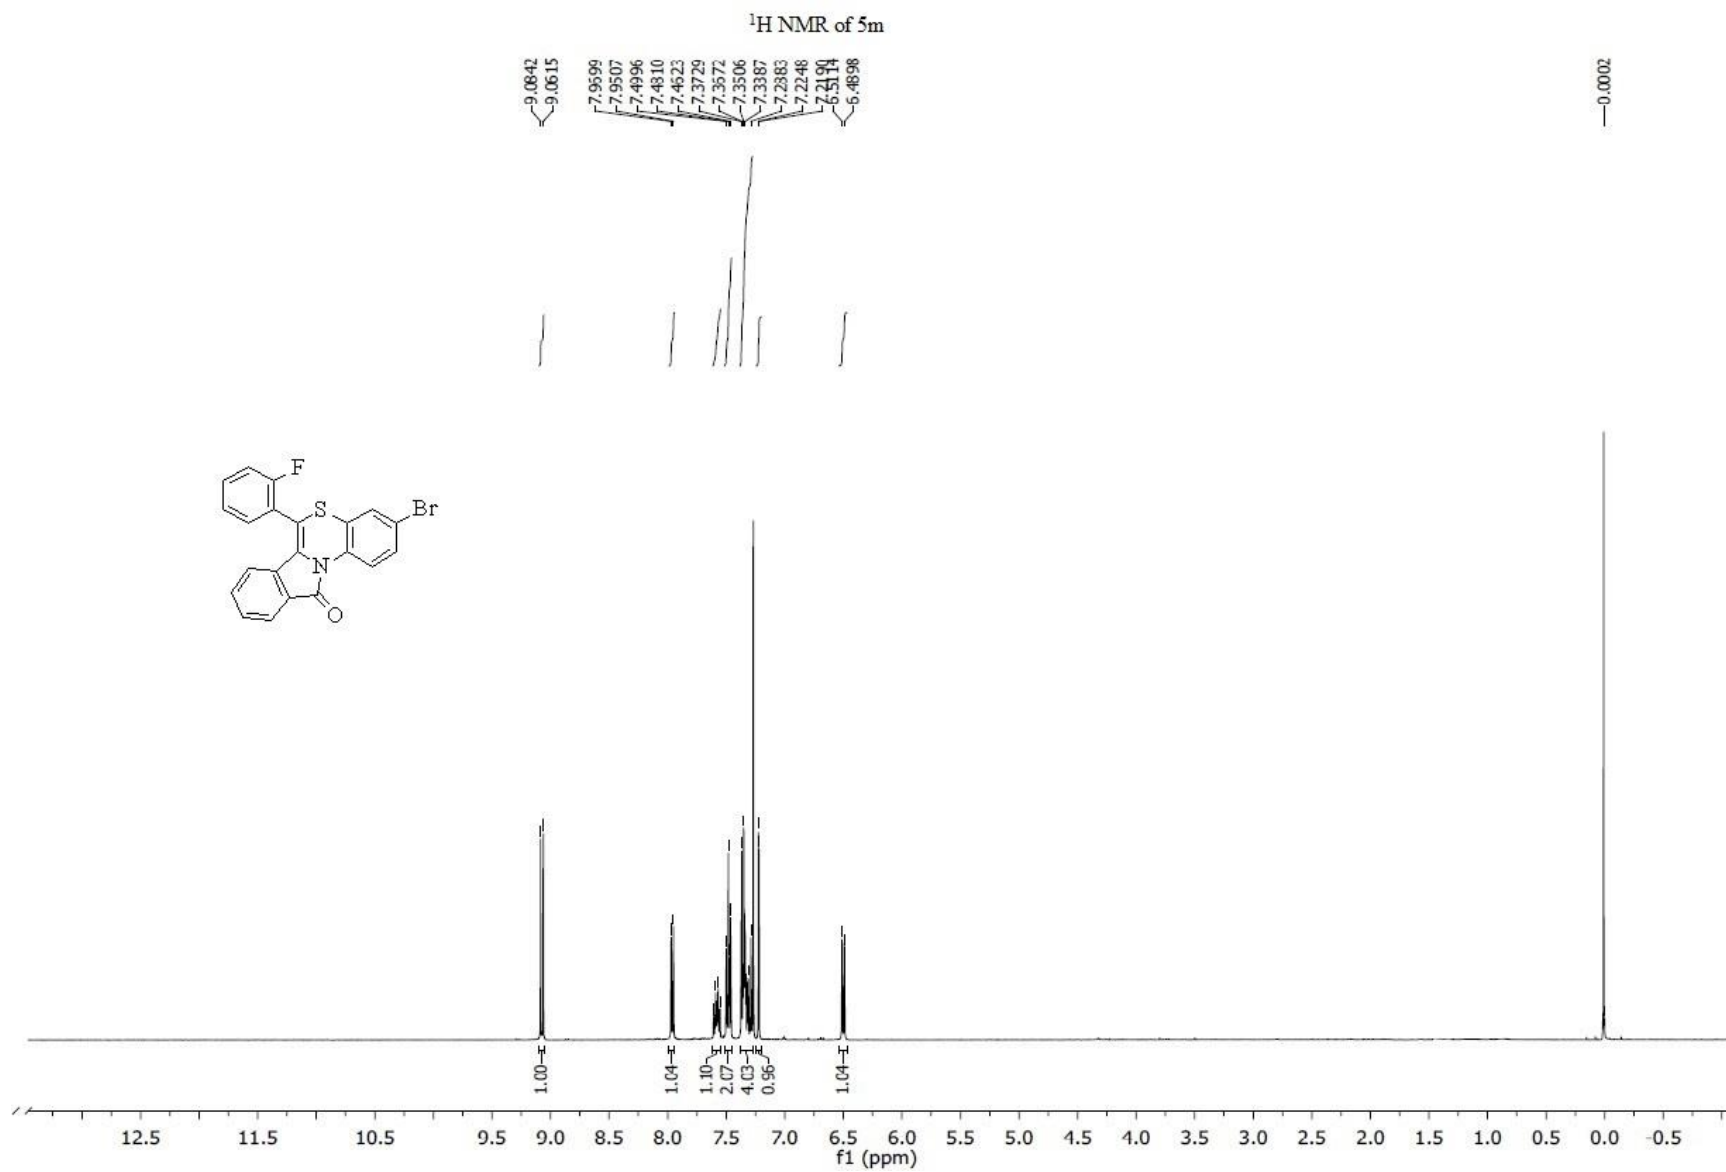

<sup>1</sup>H NMR of 5m

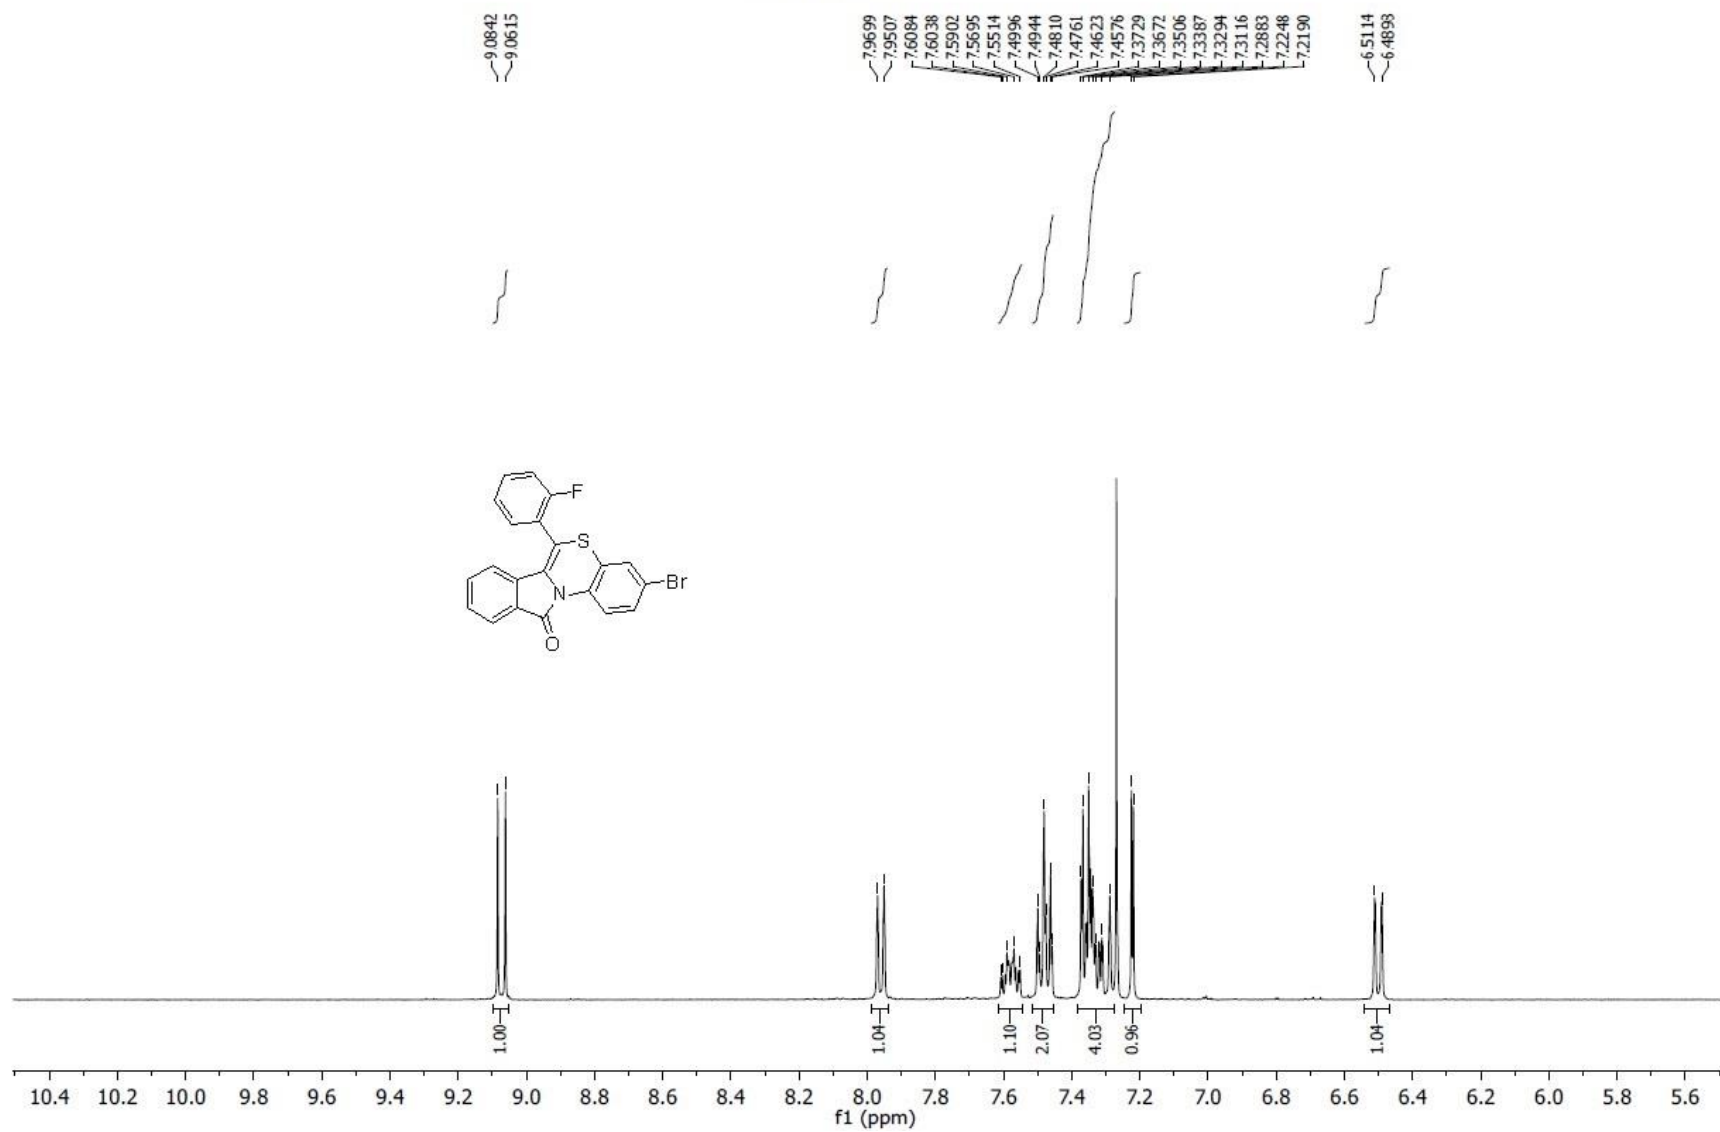

<sup>13</sup>C NMR of 5m

165.1528  
161.4092  
158.9137  
132.2979  
132.2178  
132.1365  
131.7831  
131.7648  
130.7129  
130.5715  
128.9084  
127.8274  
125.4929  
125.4588  
123.3013  
121.3570  
120.6634  
118.1043  
117.0185  
116.8937  
77.3304  
77.0129  
76.6954

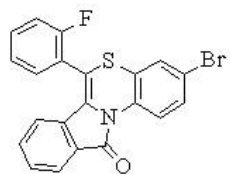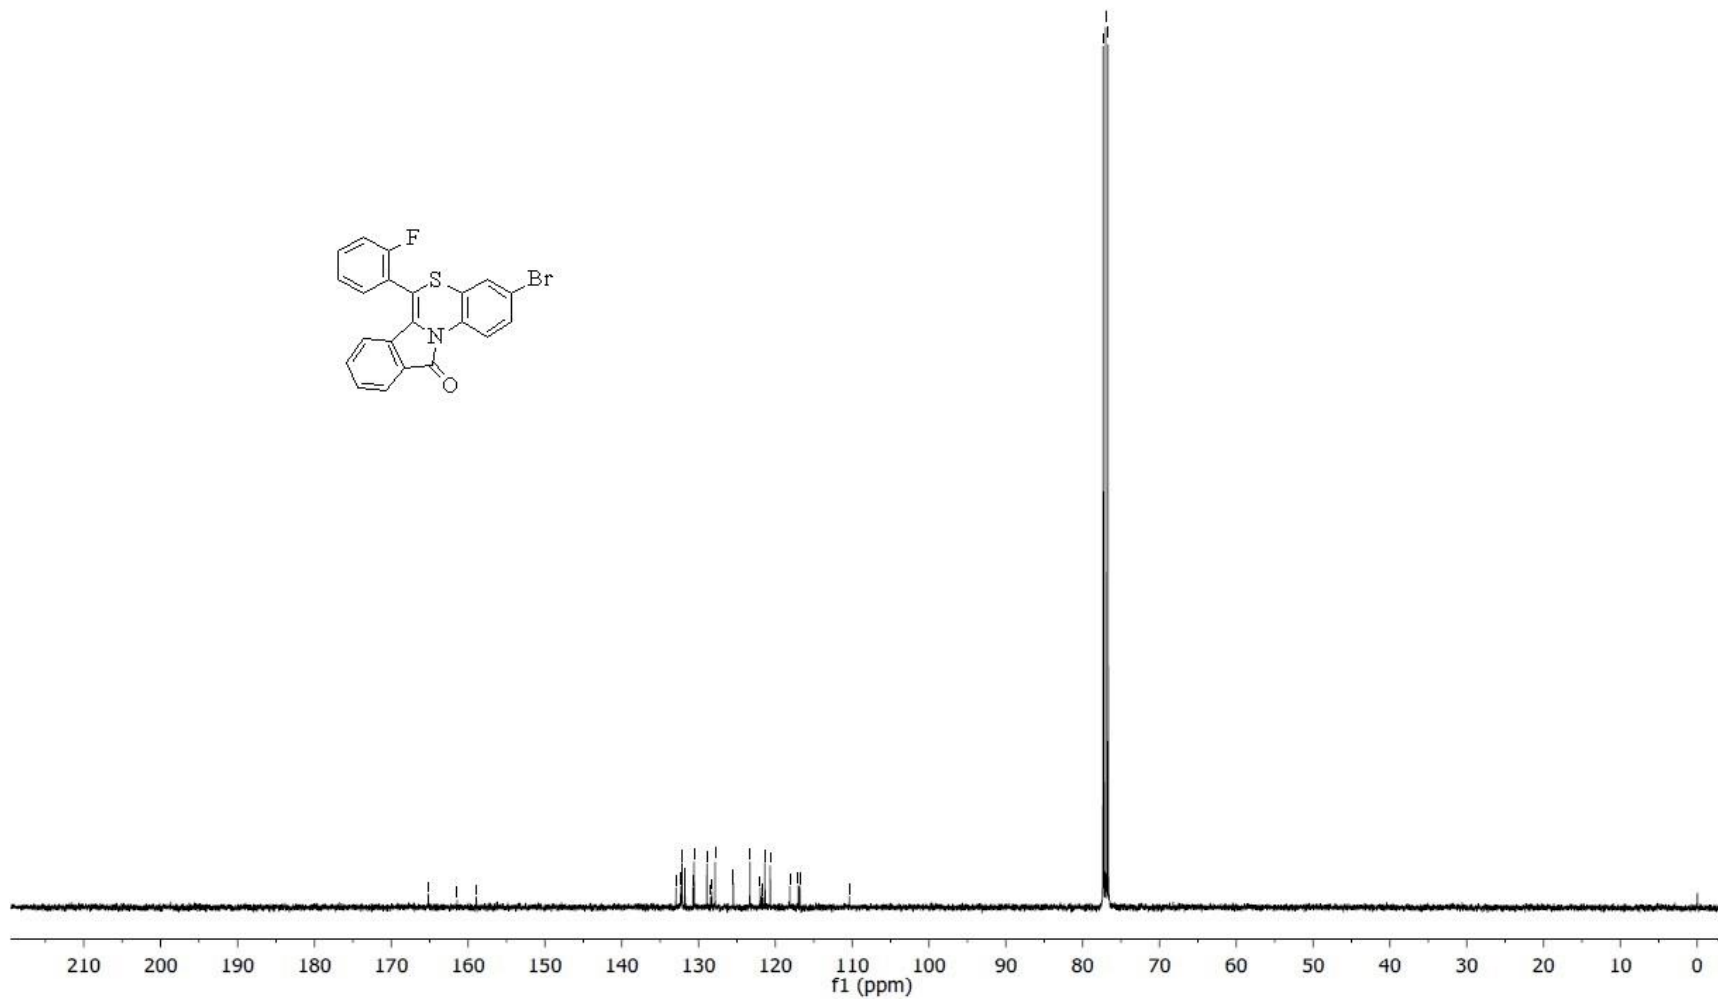

<sup>13</sup>C NMR of 5m

—165.1528

—161.4092

—158.9137

132.9366

132.2979

132.2178

132.1365

131.7831

131.7648

130.7129

130.5715

128.9064

128.4115

128.2609

127.8274

125.4929

125.4558

123.3013

121.9742

121.7802

121.6209

121.3570

120.6634

118.1043

117.0185

116.8077

—110.3737

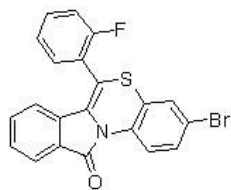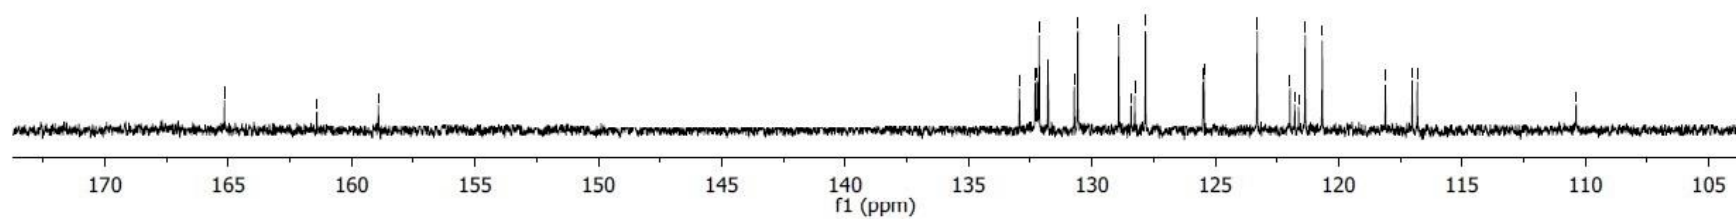

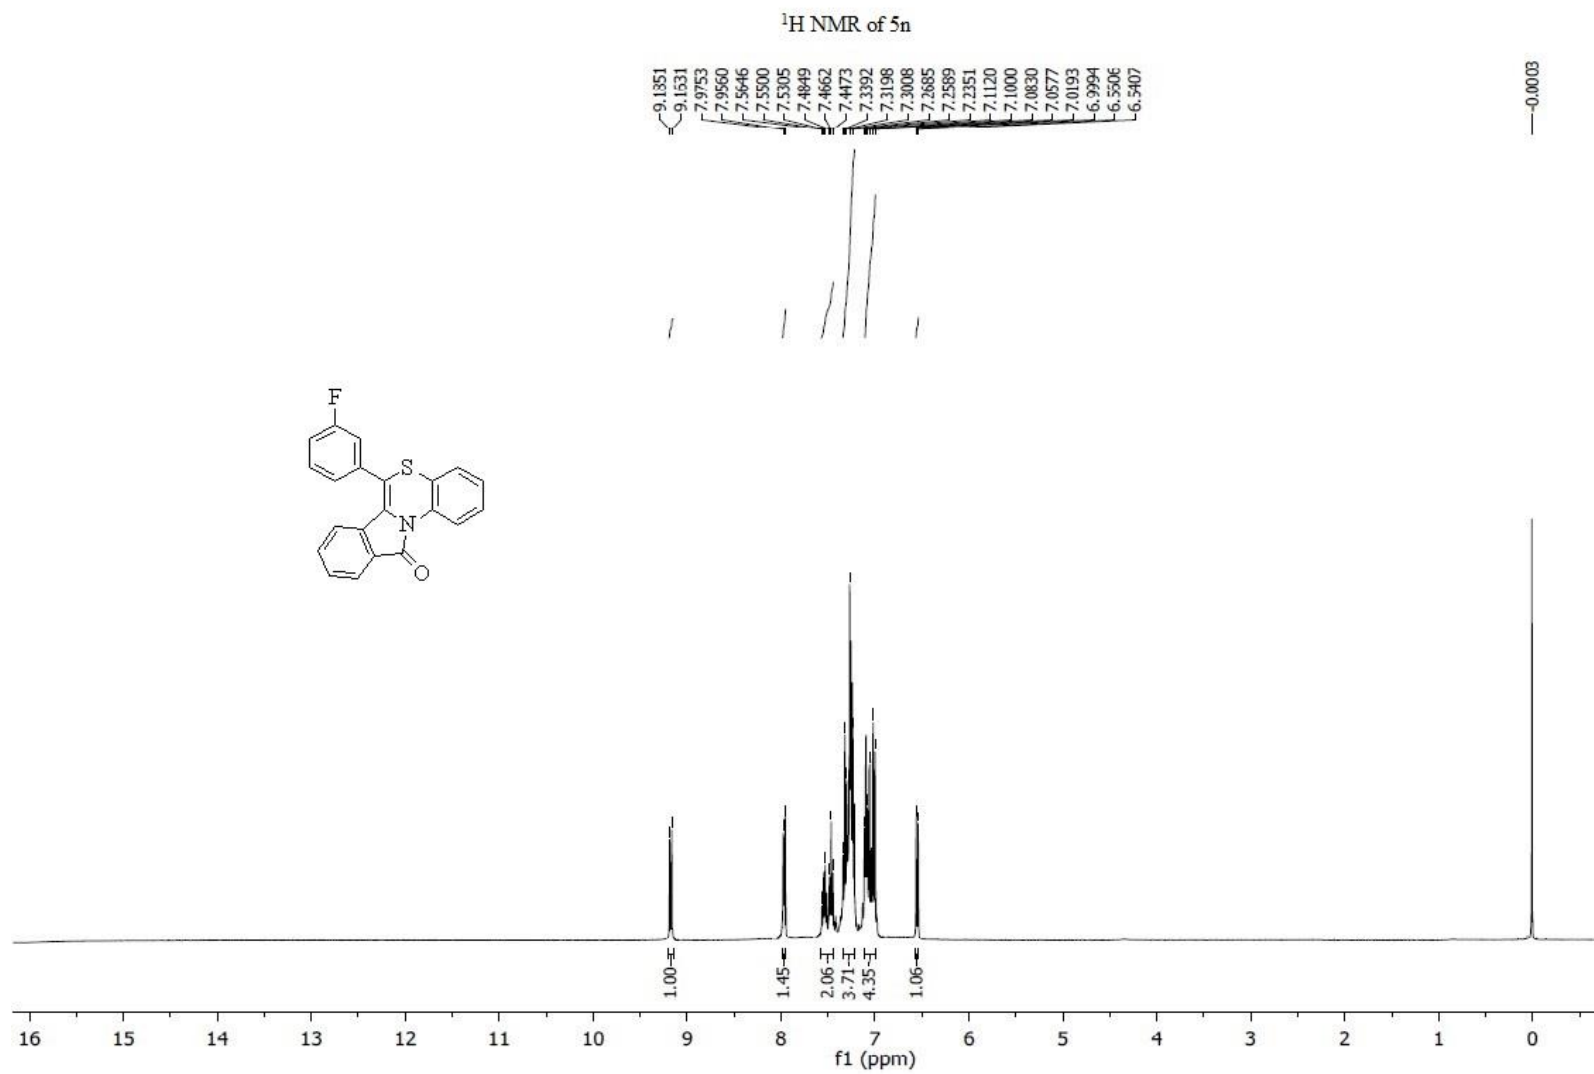

<sup>1</sup>H NMR of 5n

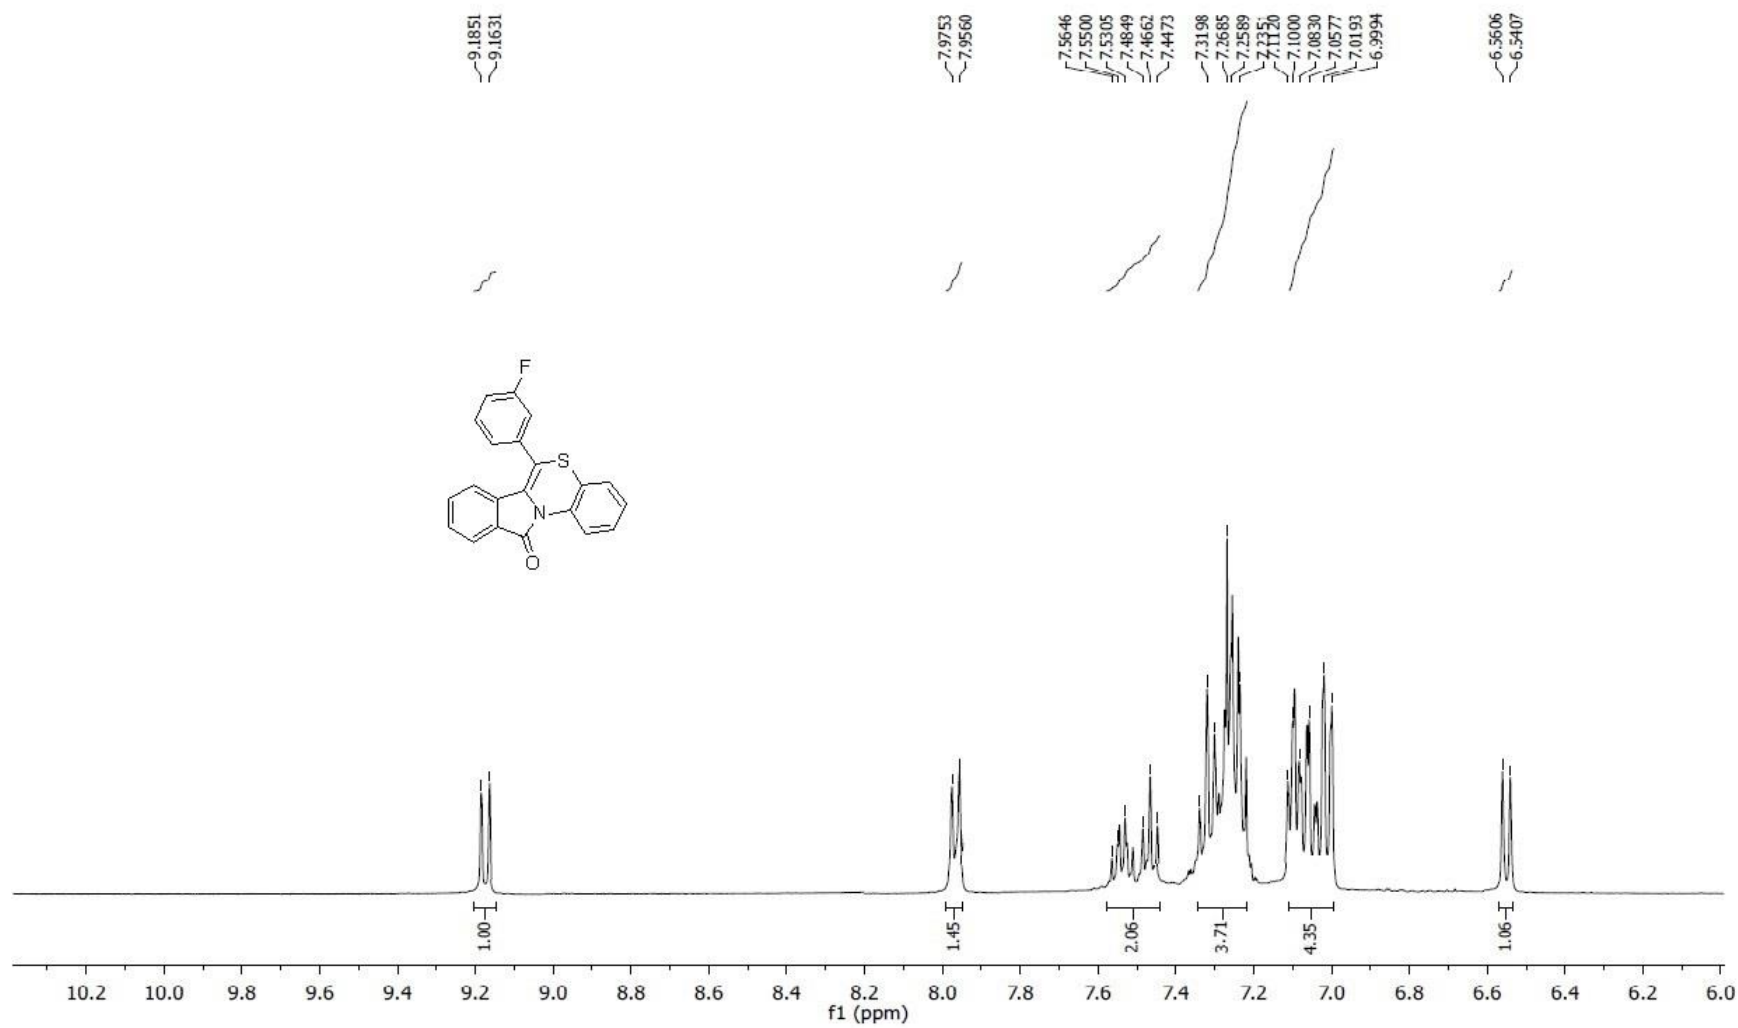



<sup>13</sup>C NMR of 5n

165.2357  
164.5397  
162.0628  
136.6868  
136.6050  
133.8021  
132.0392  
131.9588  
131.7075  
131.4982  
131.4141  
130.5814  
128.9663  
128.8856  
128.4322  
127.8986  
125.4441  
125.4134  
123.2225  
121.7872  
119.4493  
117.8957  
117.6582  
117.1405  
116.9135  
116.6943  
116.0059  
115.7961

77.3643  
77.0457  
76.7290

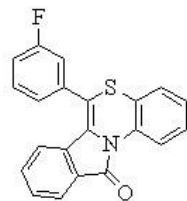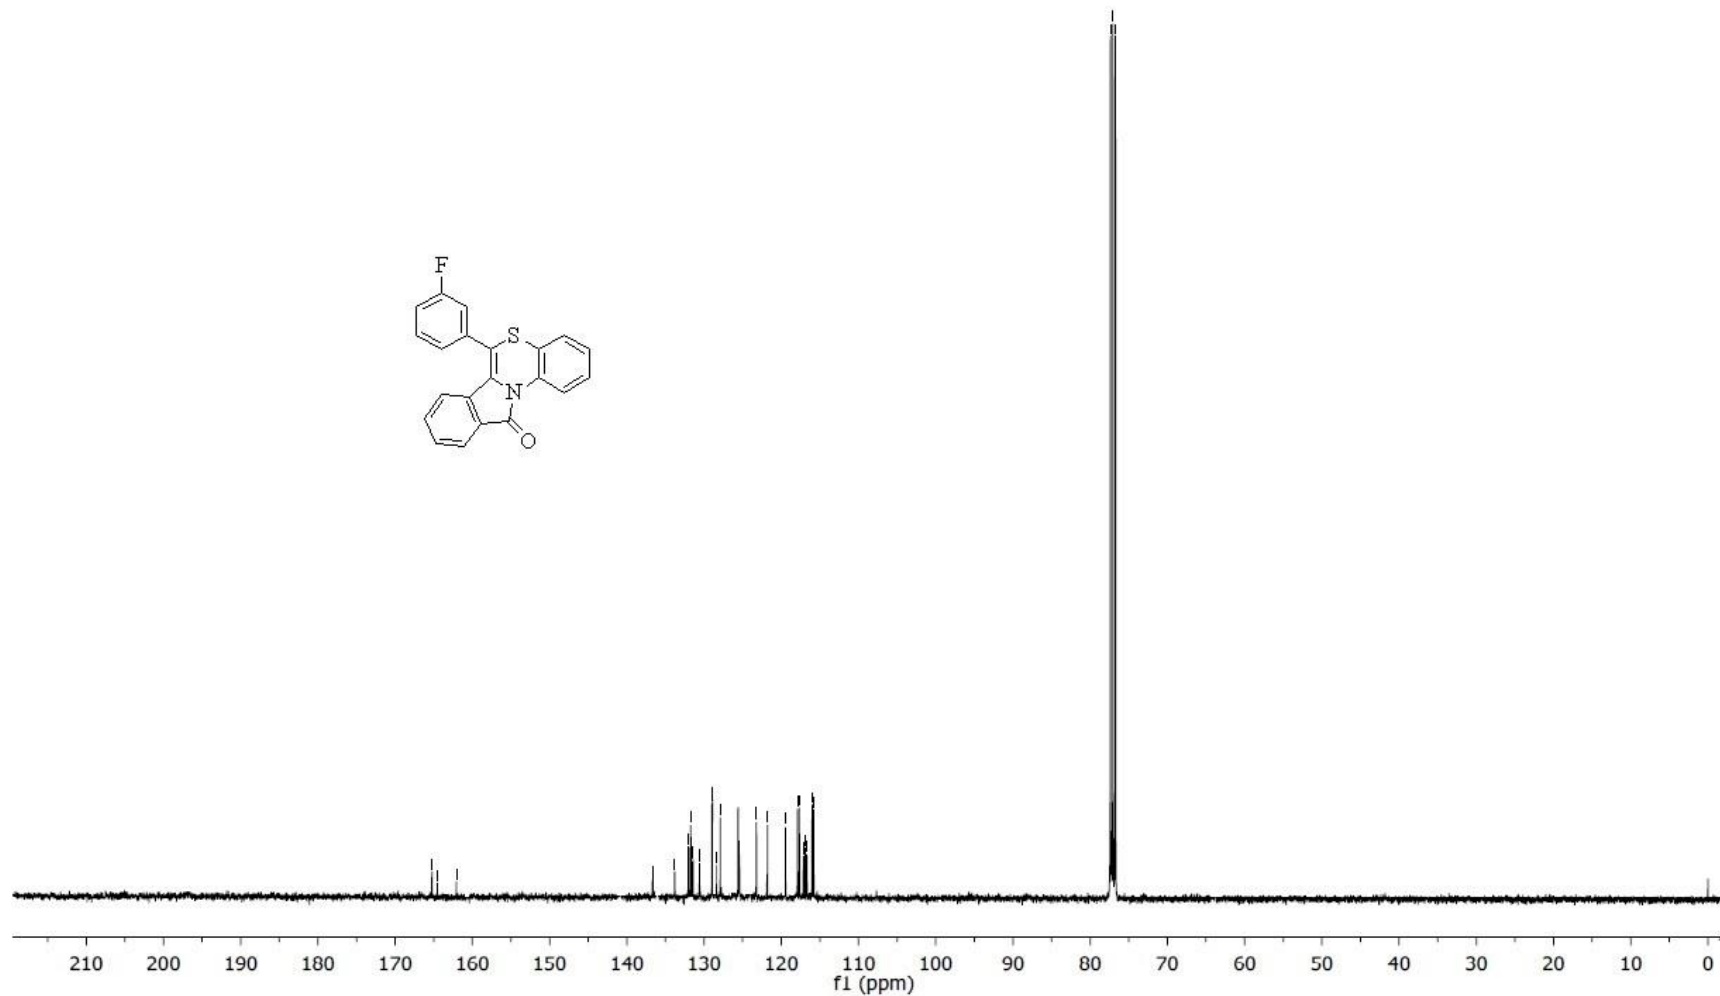

<sup>13</sup>C NMR of 5n

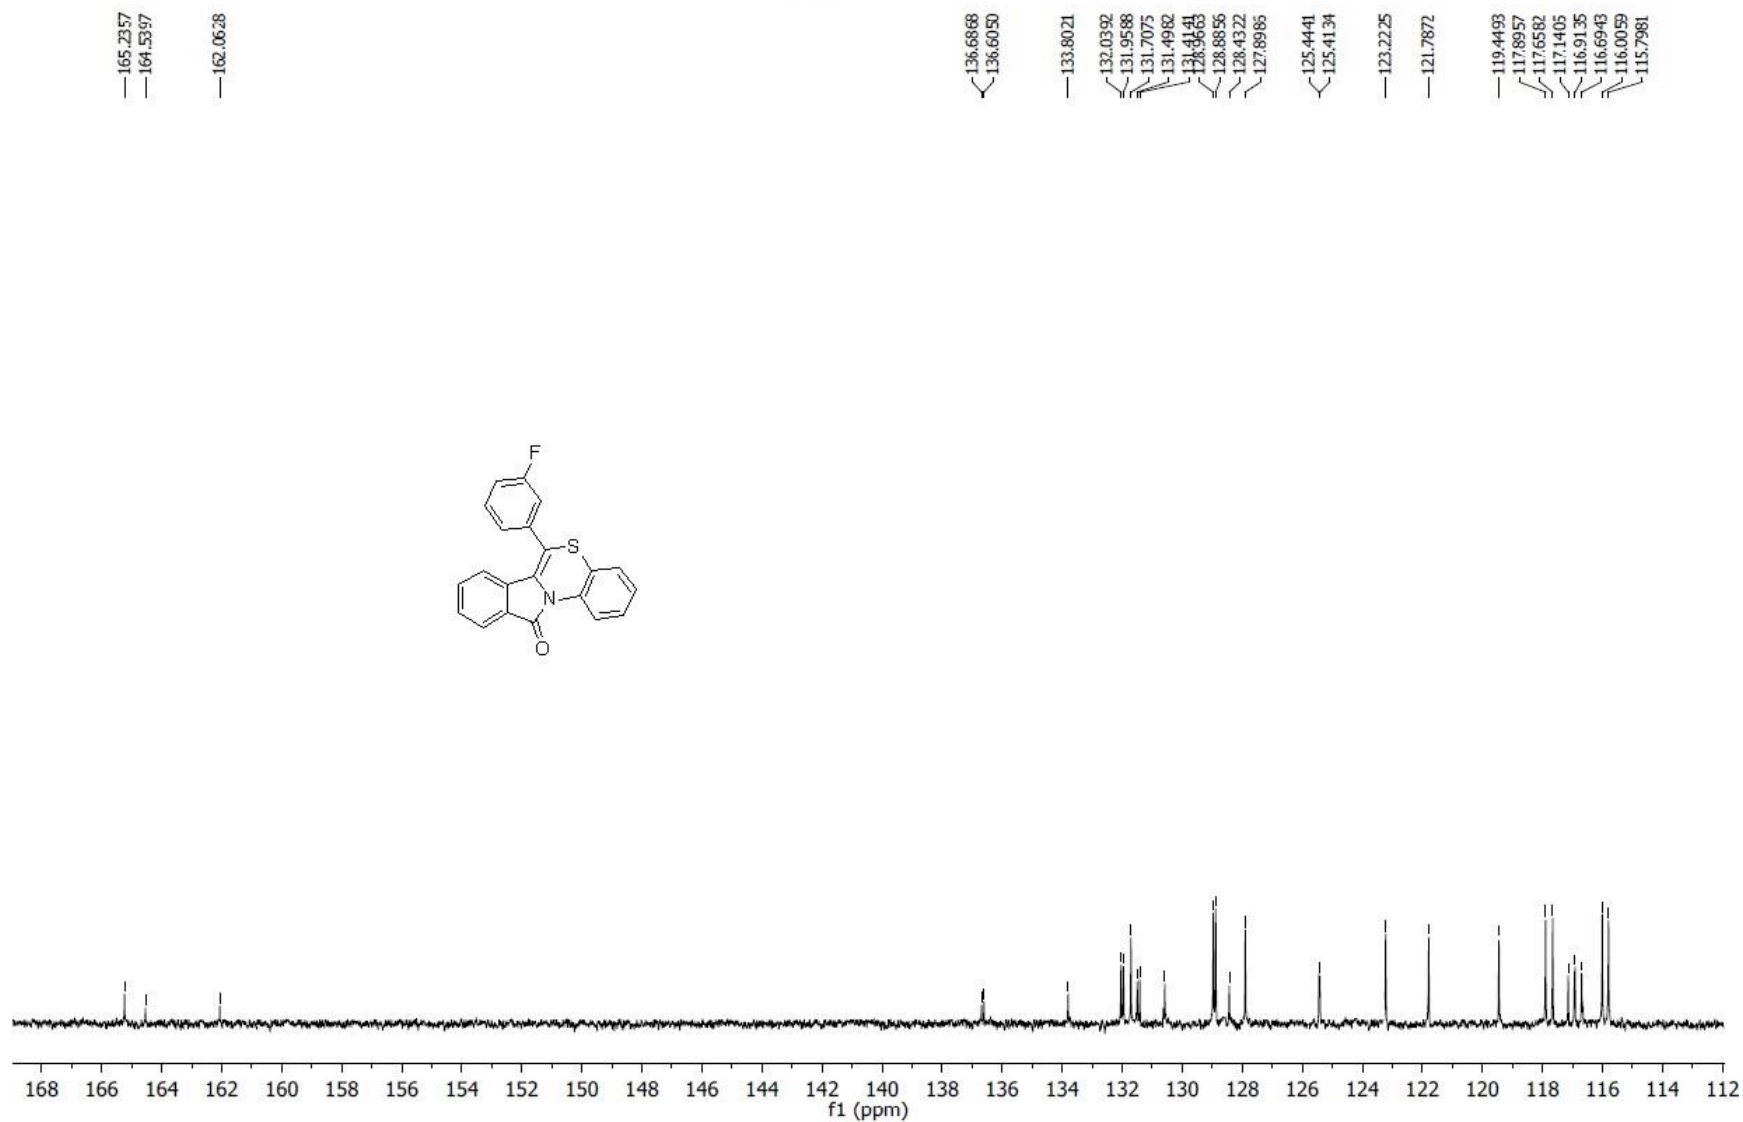

<sup>1</sup>H NMR of 5o

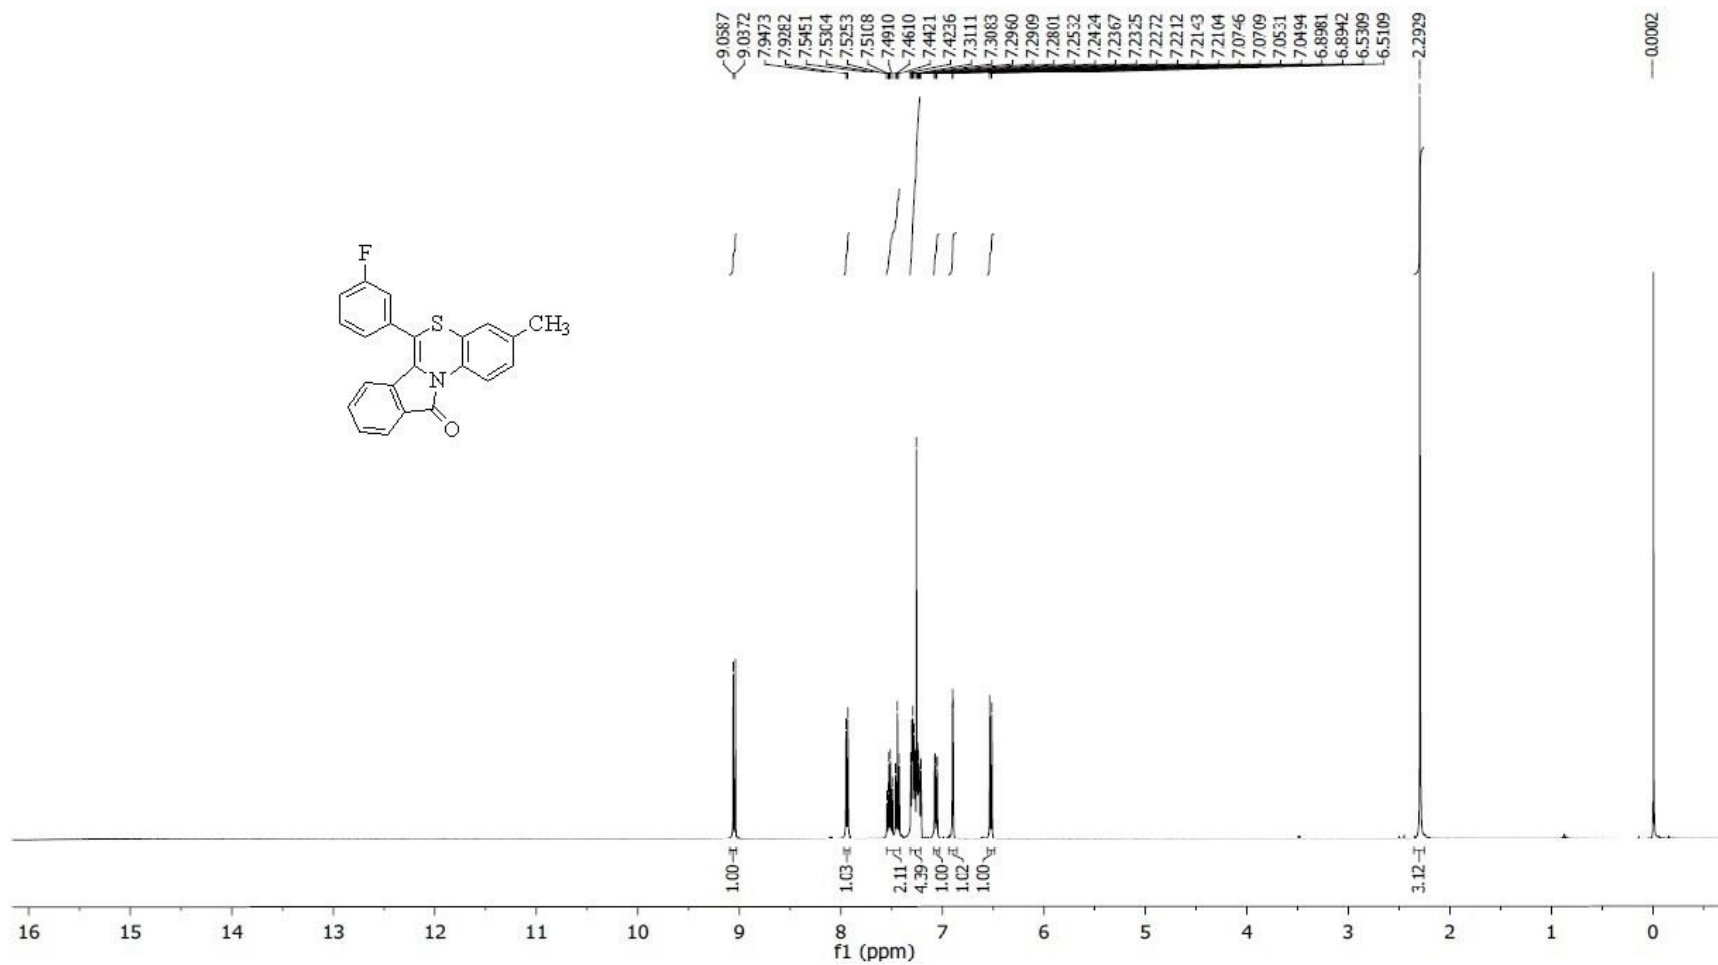

<sup>1</sup>H NMR of 5o

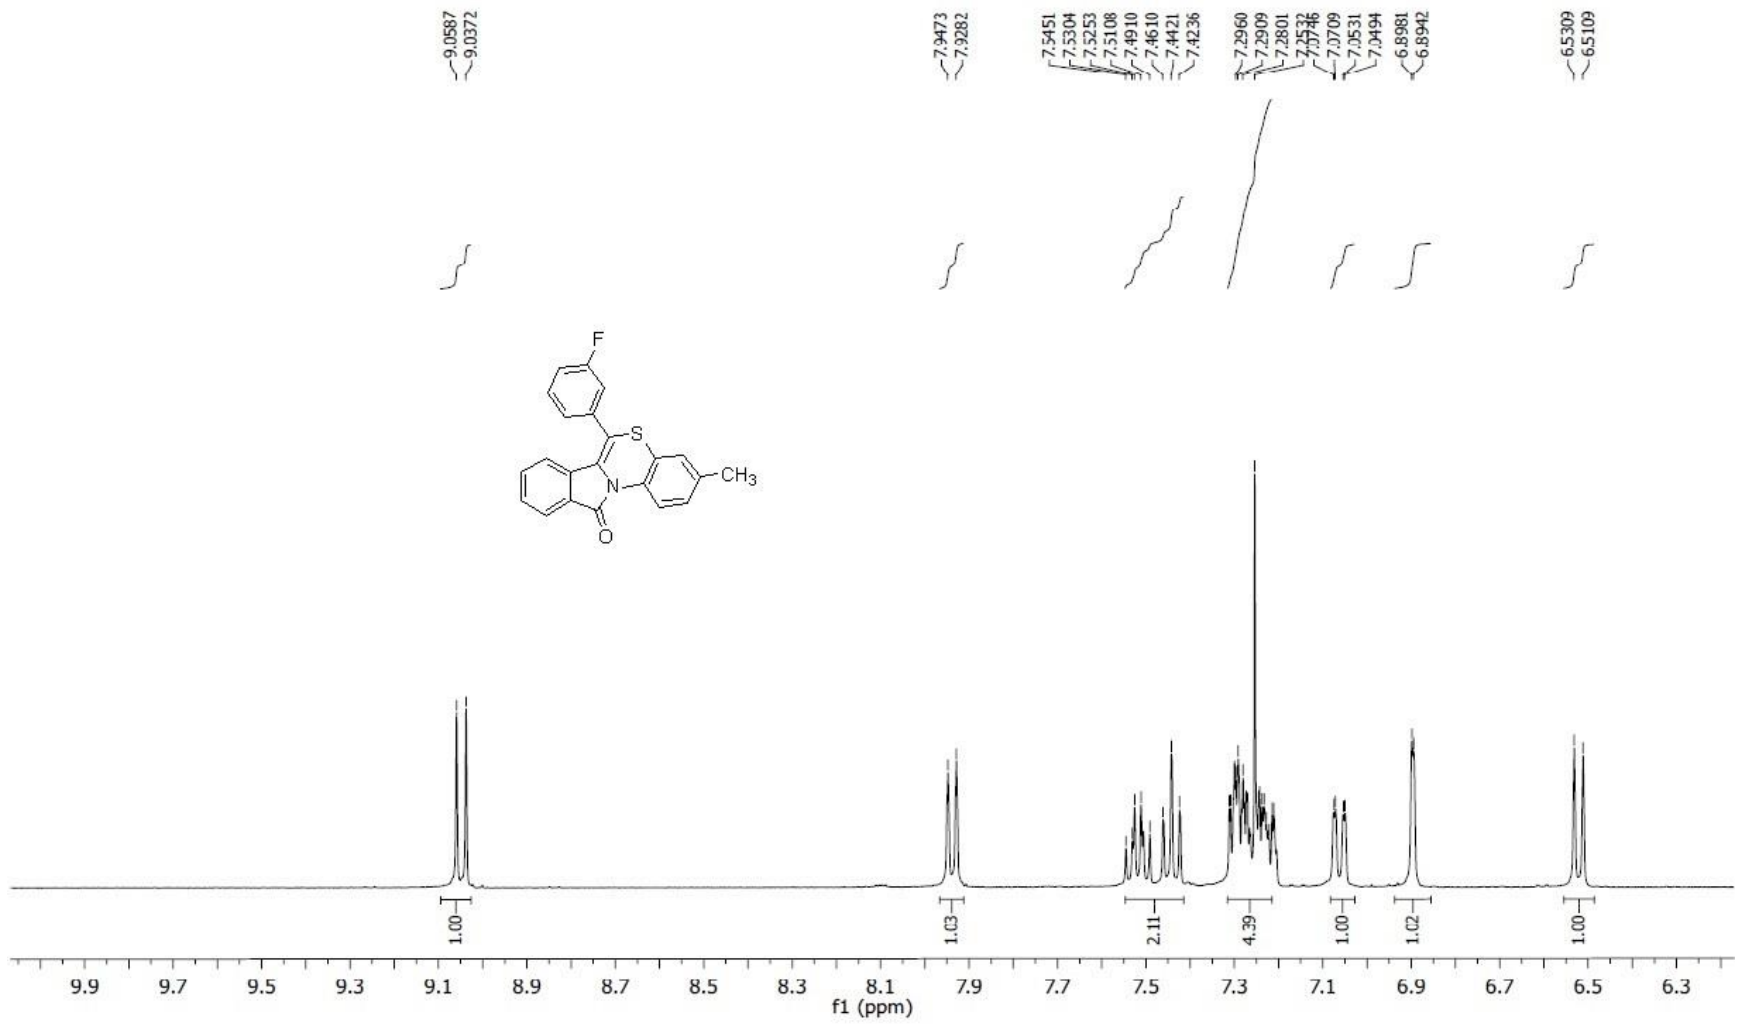

<sup>13</sup>C NMR of 5o

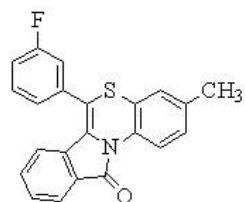

165.0389  
164.5123  
162.0371  
136.7868  
136.7063  
135.4524  
131.5124  
131.4321  
131.3481  
131.2929  
130.5448  
128.5200  
128.4903  
127.1596  
125.7735  
125.4612  
125.4309  
123.1067  
121.7428  
119.2821  
117.9623  
116.9319  
116.8547  
116.7136  
116.6031  
116.5833

77.3376  
77.0001  
76.7025

20.6690

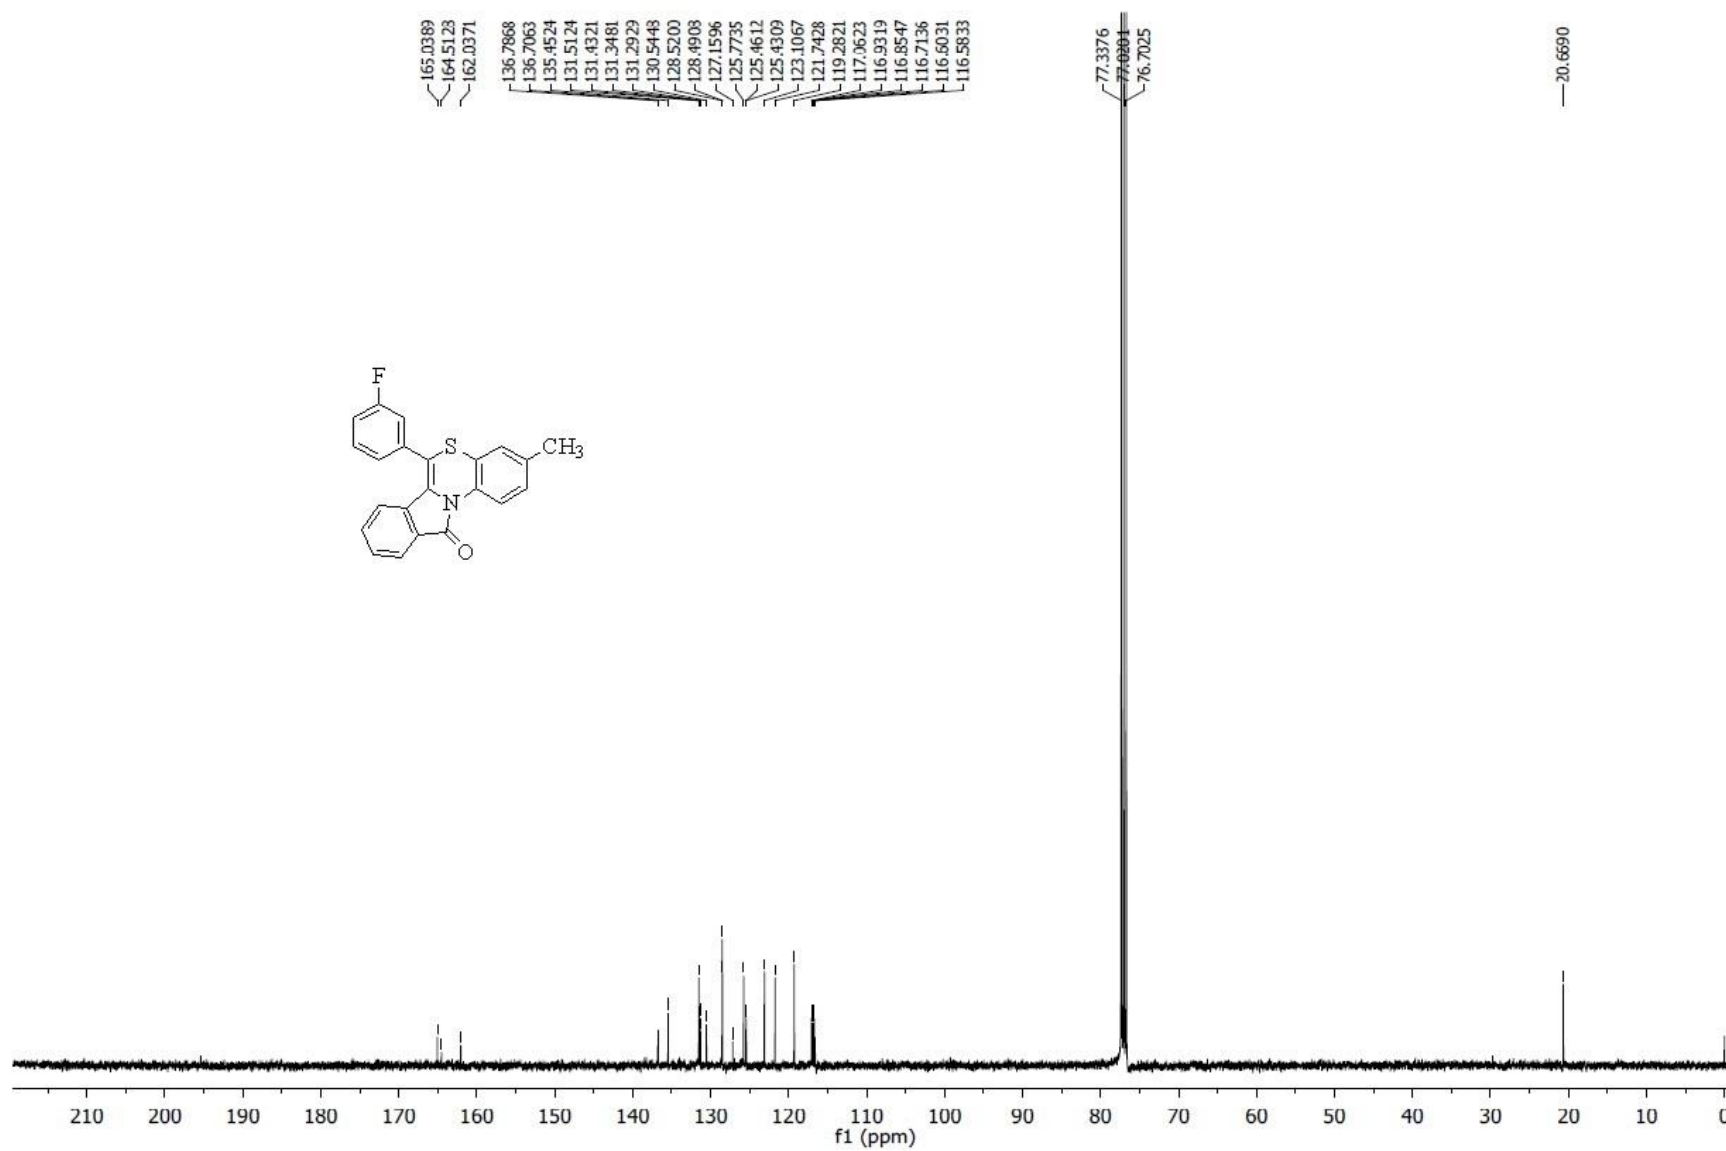

<sup>13</sup>C NMR of 5o

165.0389  
164.5123

162.0371

136.7868  
136.7063  
135.4524

131.5124  
131.4321  
131.3481  
131.2929  
130.5448

128.5200  
128.4908  
127.1596

125.7735  
125.4612  
125.4309

123.1067  
121.7428

119.2821  
117.0623  
116.9319  
116.8547  
116.7136  
116.6031  
116.5833

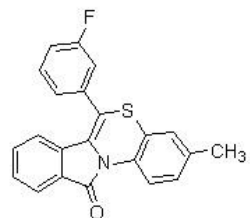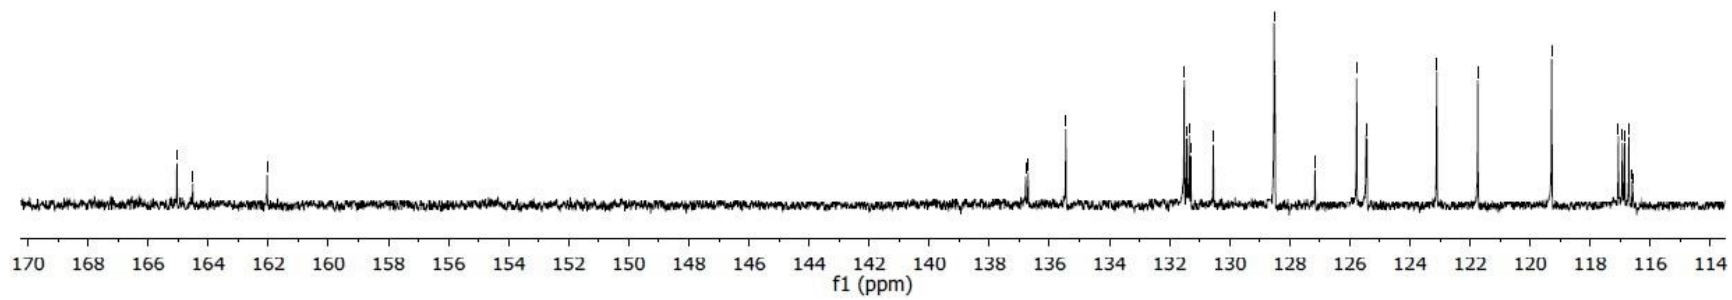

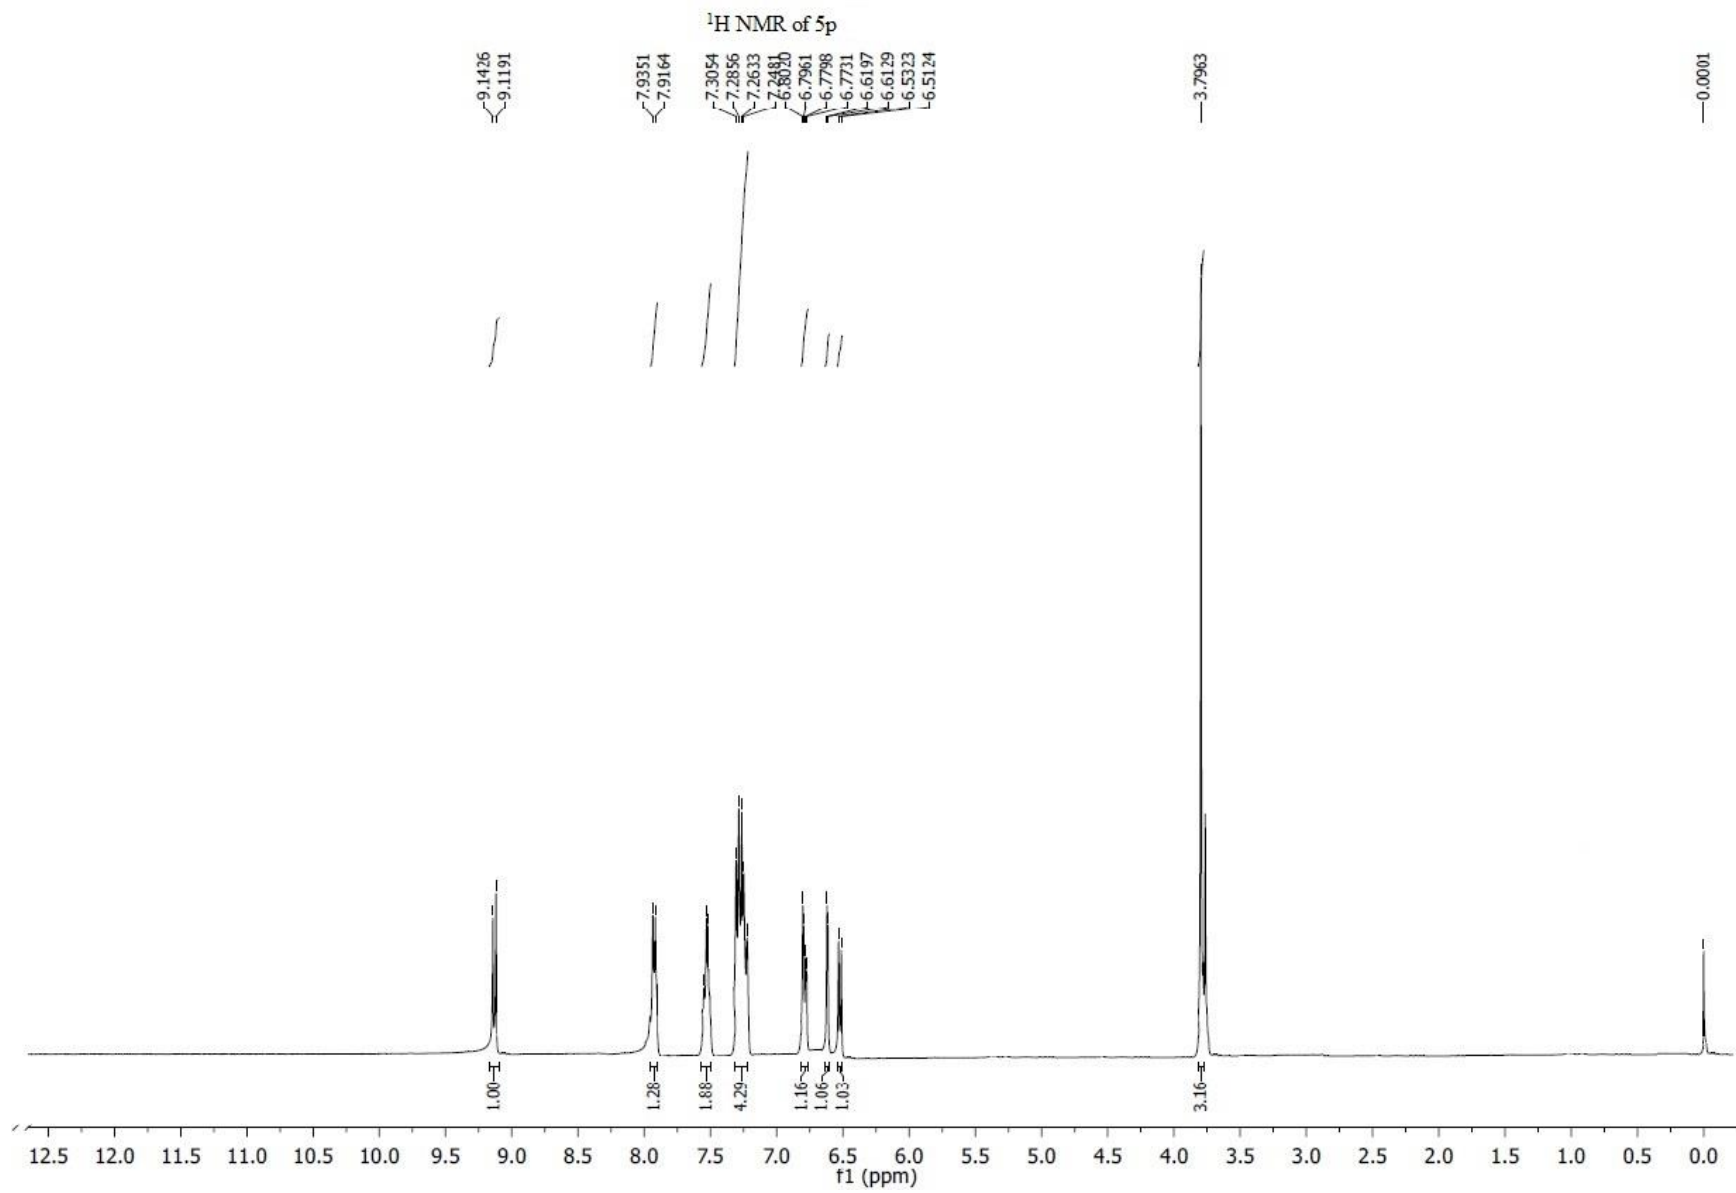

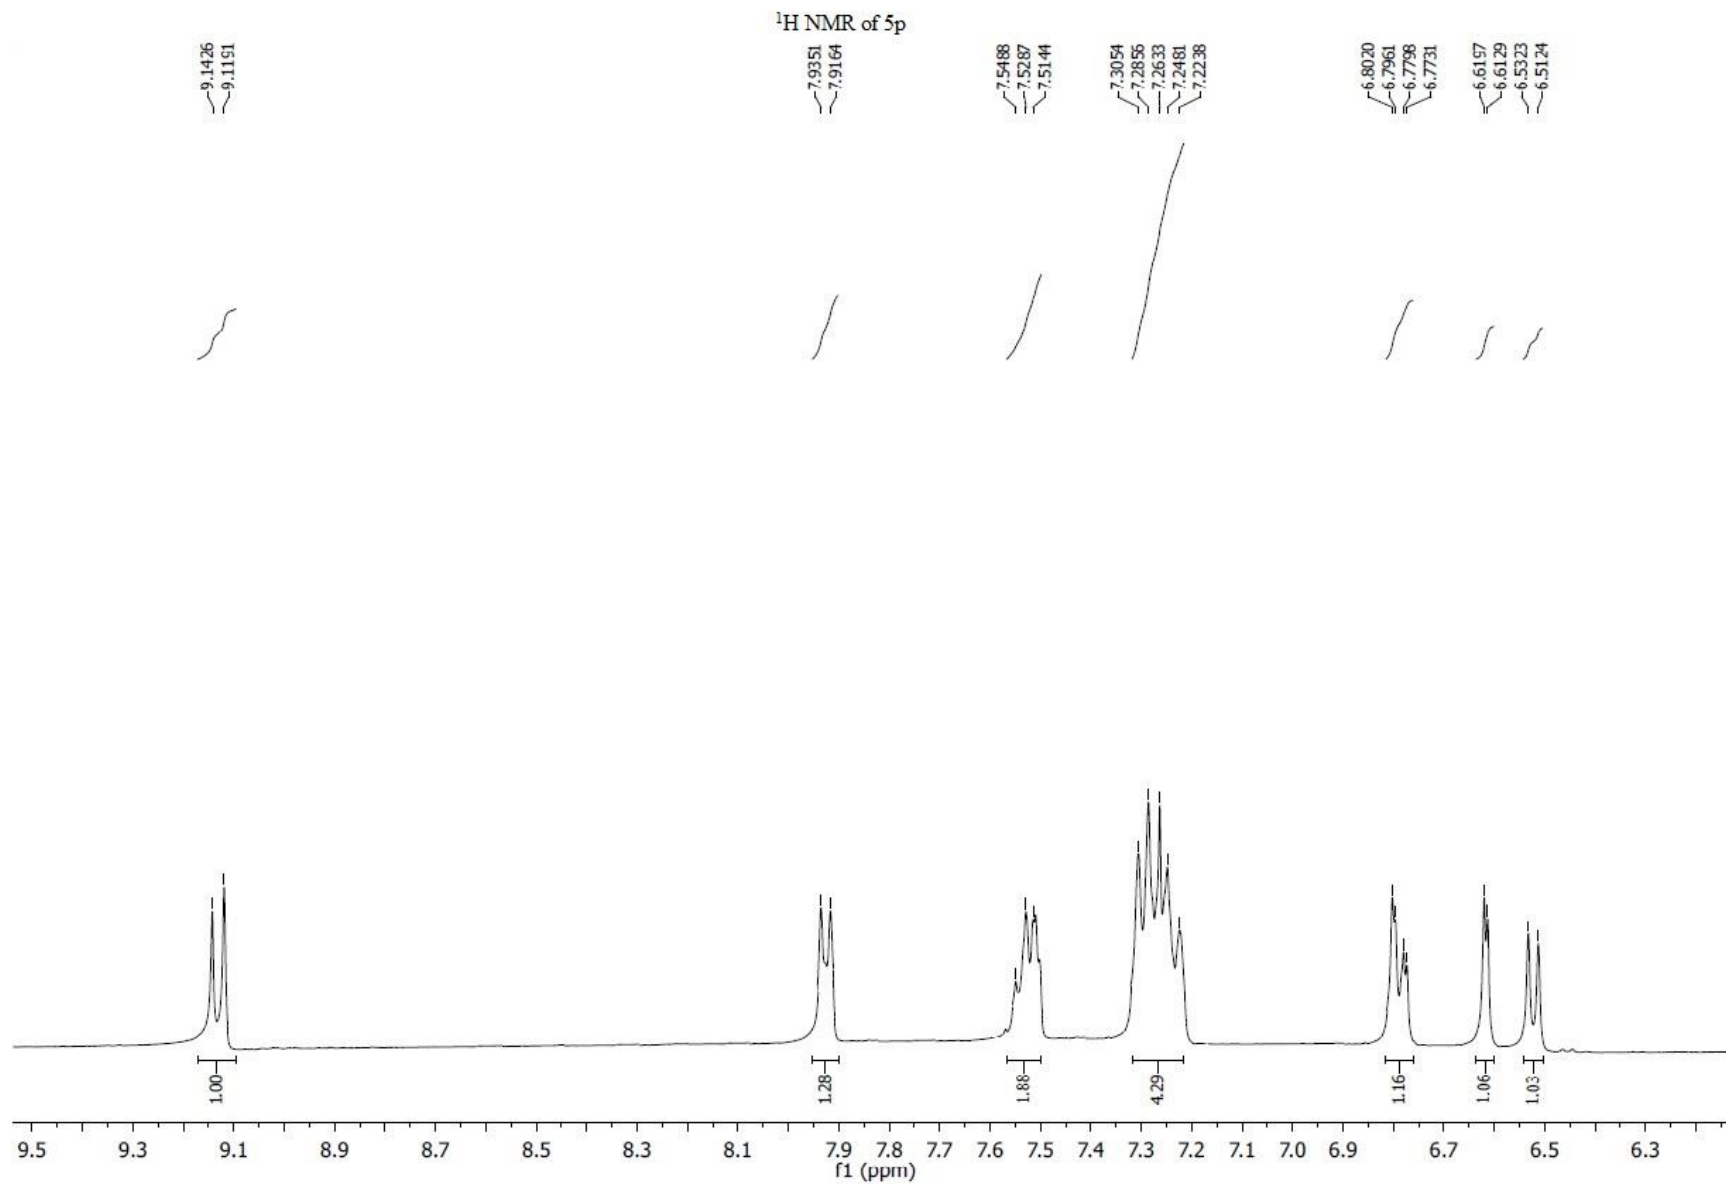



<sup>13</sup>C NMR of 5p

164.8395  
164.5171  
162.0389  
156.6333  
136.6491  
136.5695  
133.7939  
132.9225  
131.4389  
131.3764  
131.2993  
130.4703  
129.9663  
129.8854  
128.5823  
127.1183  
125.5163  
125.4863  
123.0229  
121.7398  
120.6477  
117.2526  
117.1212  
116.9753  
116.9135  
116.7567  
115.8910  
77.3740  
77.0563  
76.7386  
55.5502

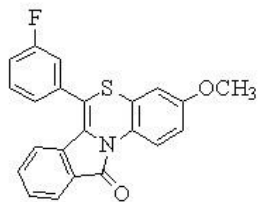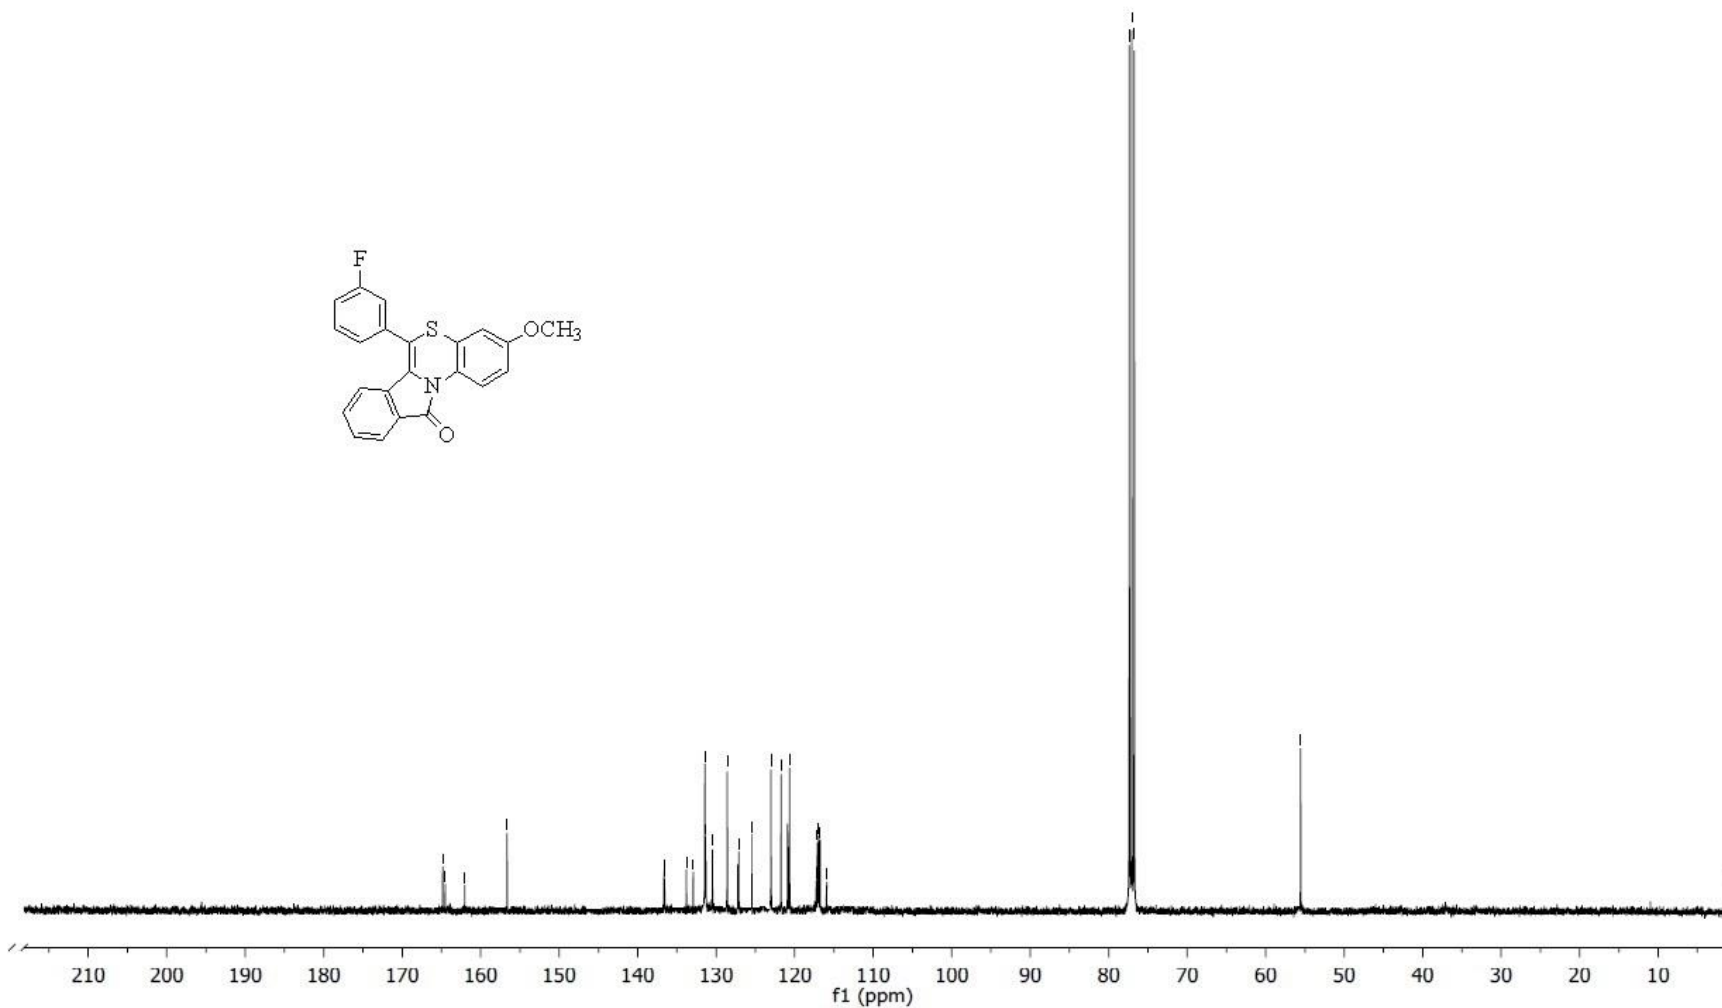

<sup>13</sup>C NMR of 5p

164.8395  
164.5171

162.0389

156.6333

136.6491  
136.5696

133.7939

132.9126

131.4389

131.3764

131.2993

130.4708

129.9668

129.8854

128.5823

127.1183

125.168

125.4863

123.0229

121.7398

120.6477

117.2526

117.1212

116.9753

116.9135

116.7367

115.8910

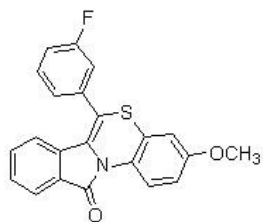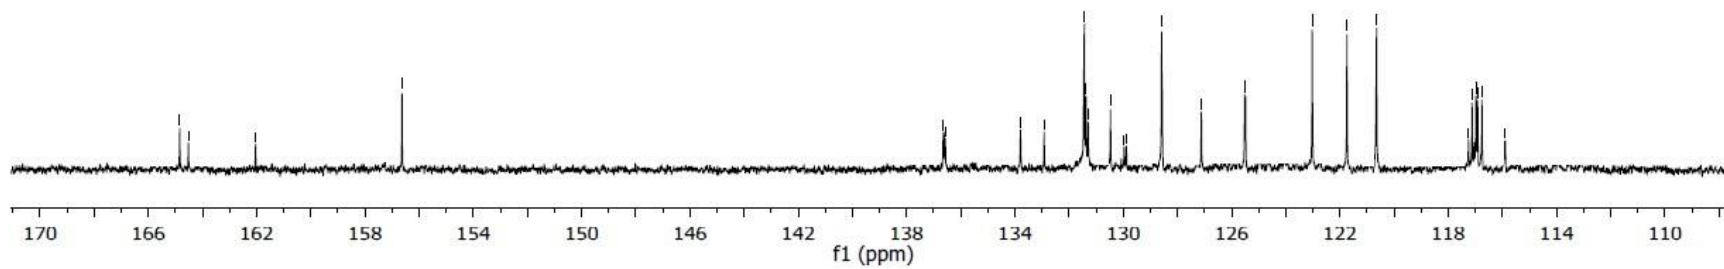

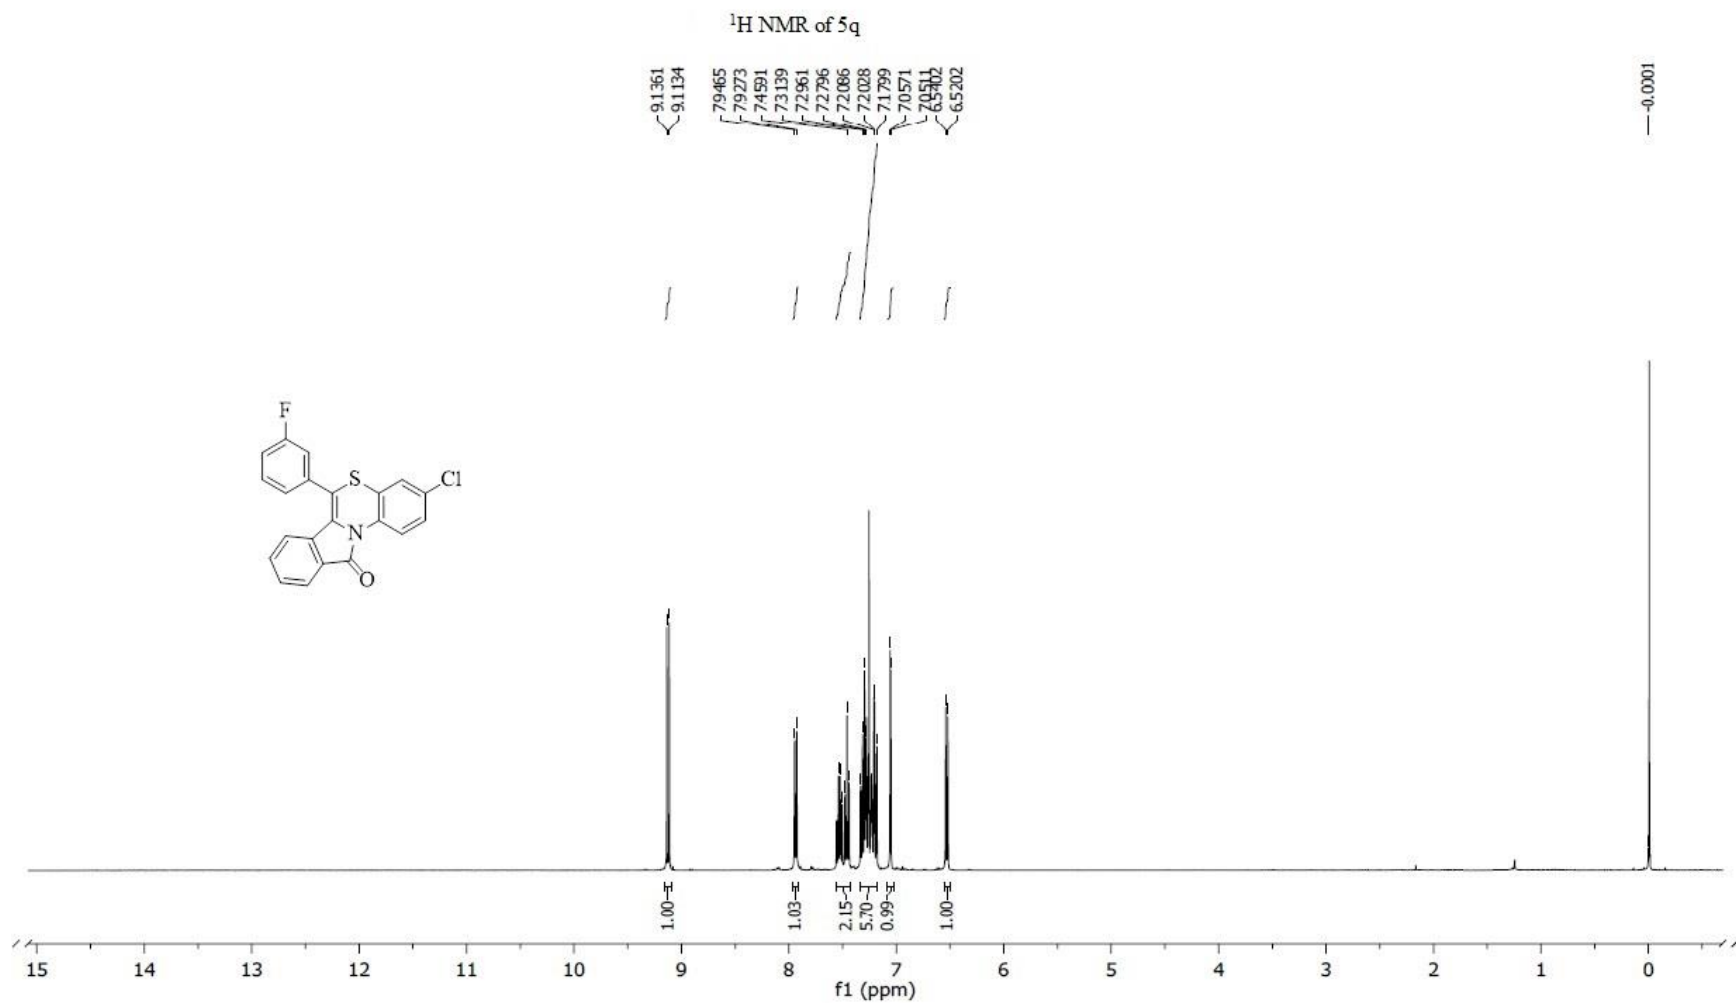

<sup>1</sup>H NMR of 5q

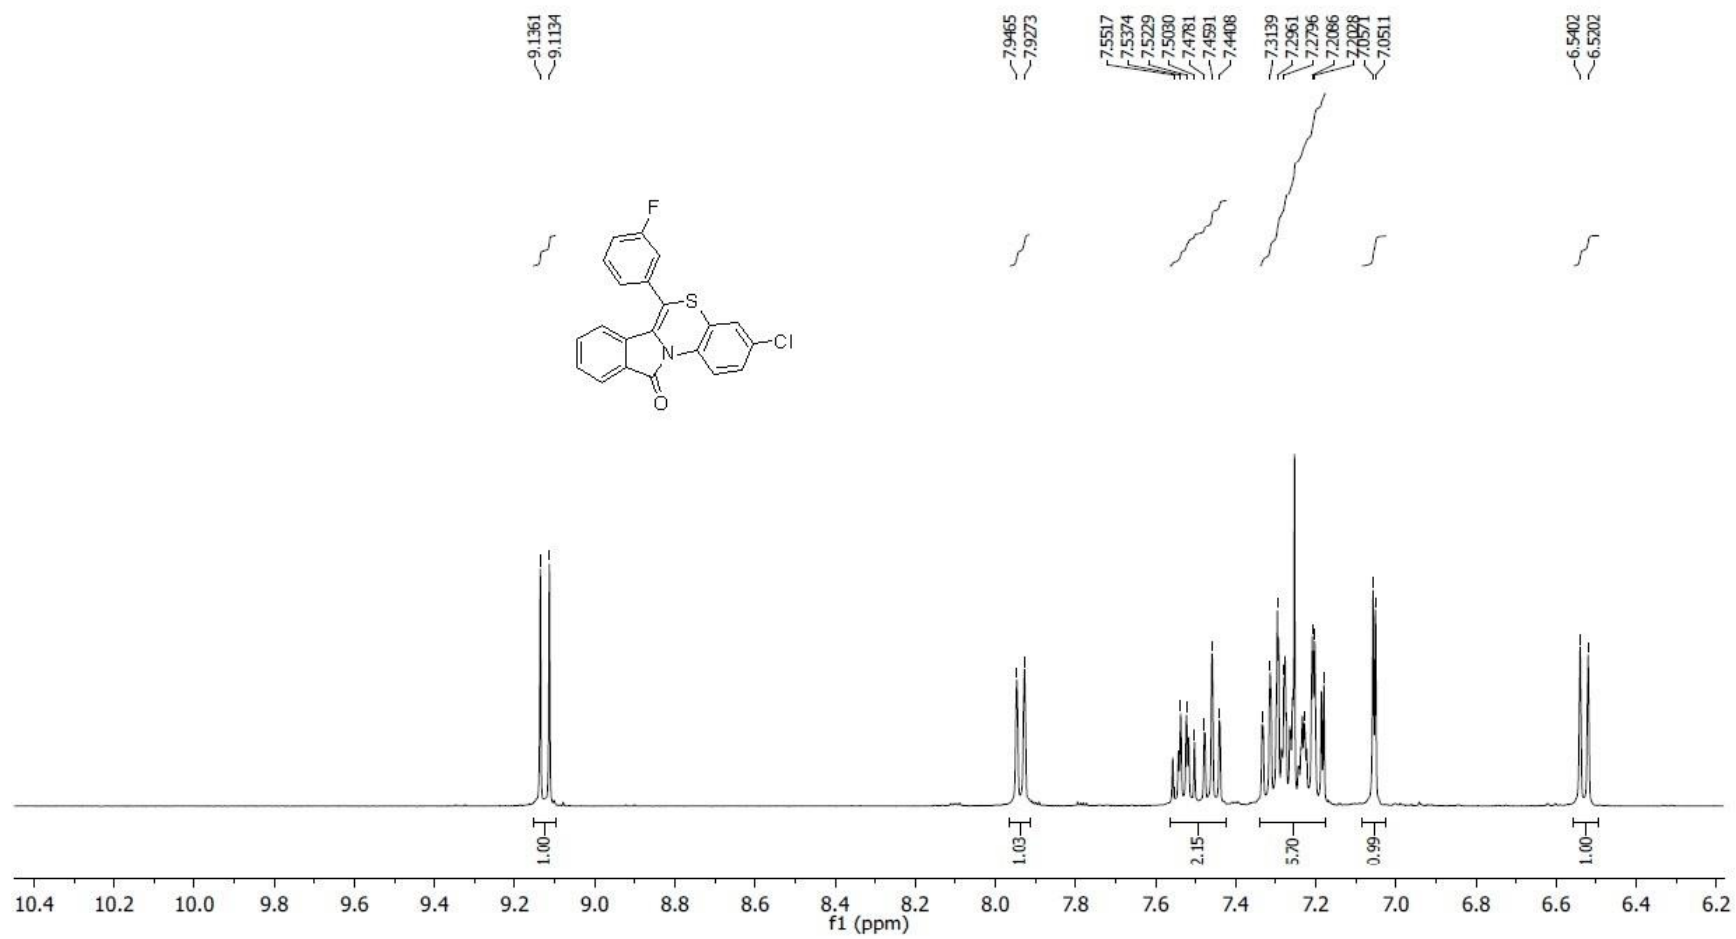

<sup>13</sup>C NMR of 5q

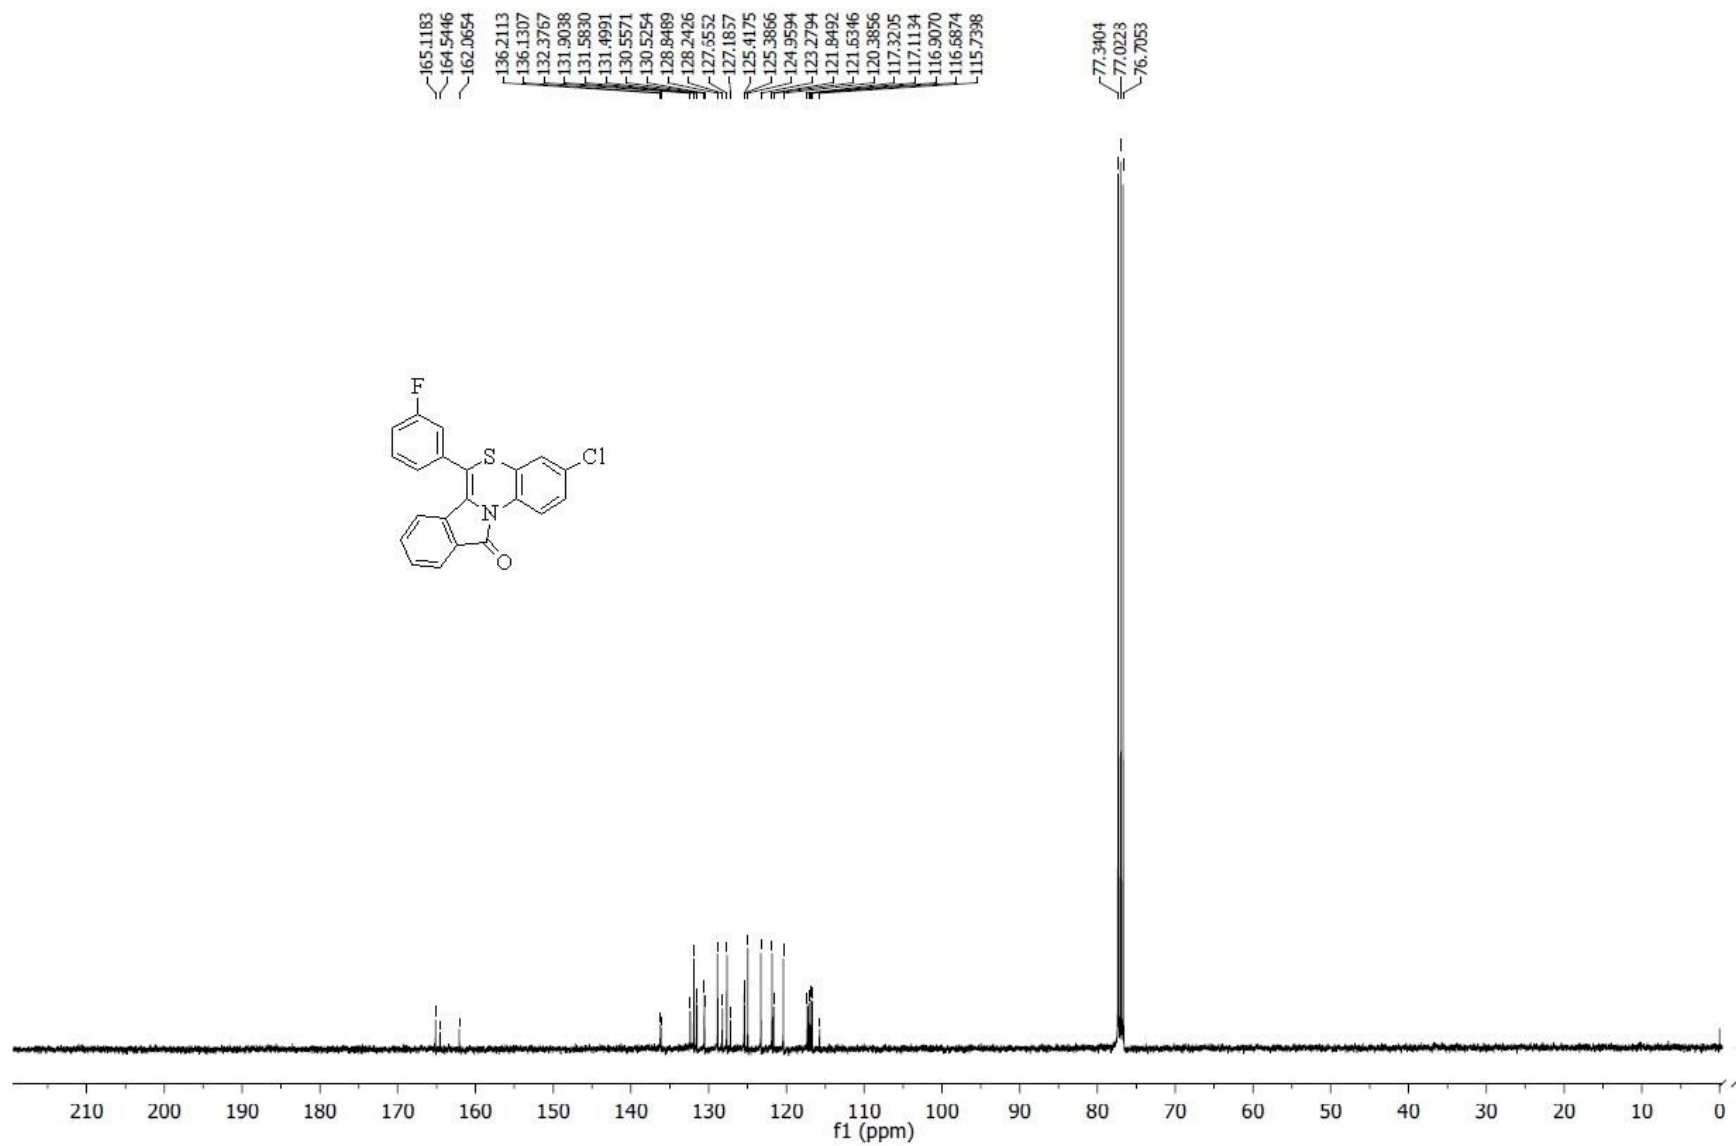

<sup>13</sup>C NMR of 5q

165.1183  
164.5446  
162.0654

136.2113  
136.1307

132.3767  
131.9038  
131.5830  
131.4491  
130.5571  
130.5254  
128.8489  
128.2426  
127.6552  
127.1857

125.4175  
125.3866  
124.9594  
123.2794  
121.8492  
121.6346  
120.3856

117.3205  
117.1134  
116.9070  
116.6874  
115.7898

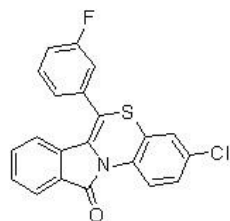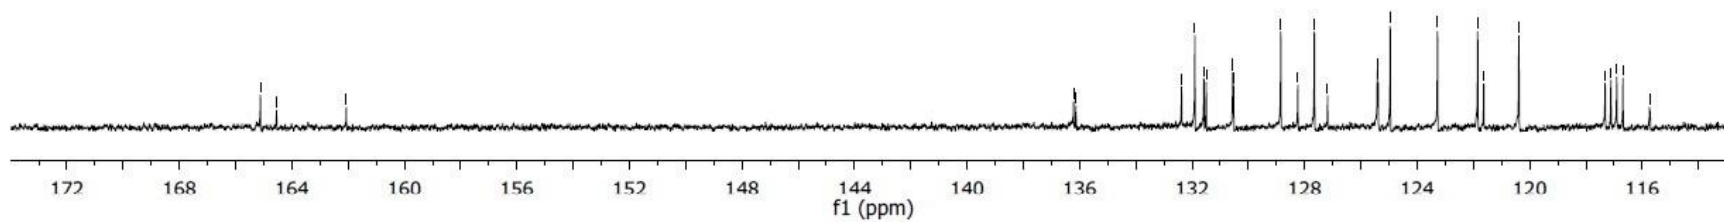

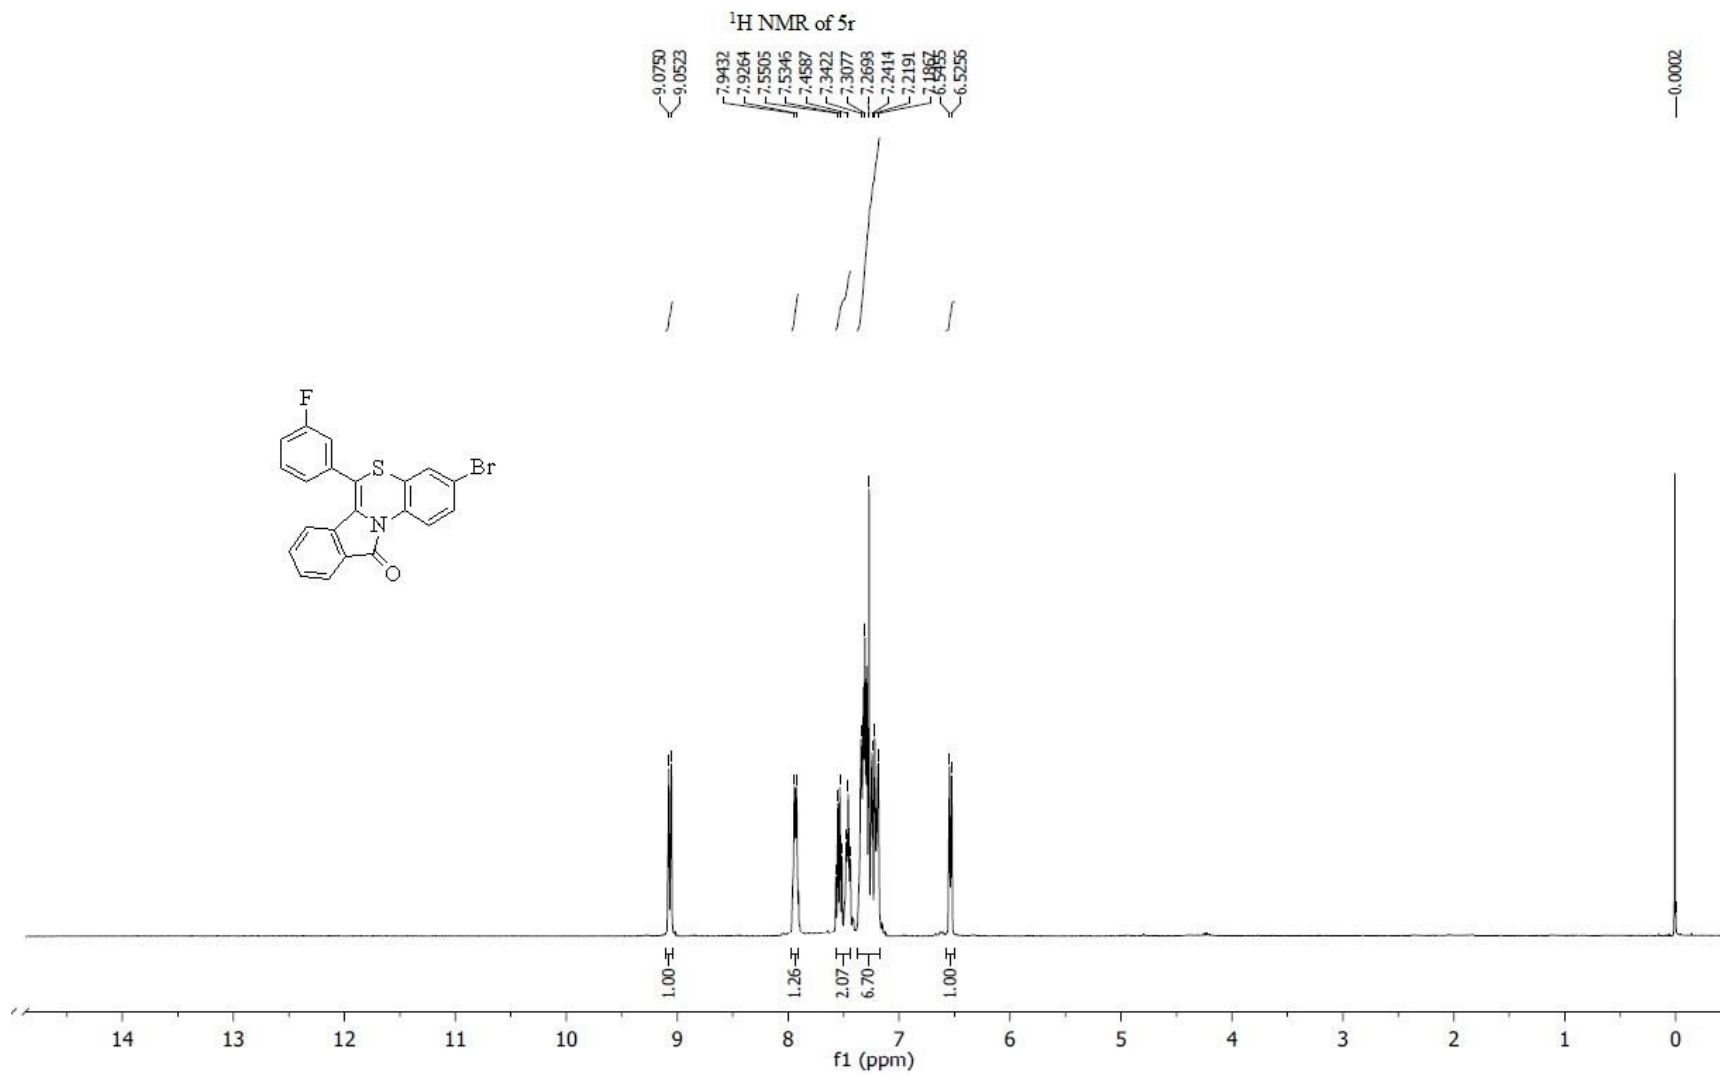

<sup>1</sup>H NMR of 5r

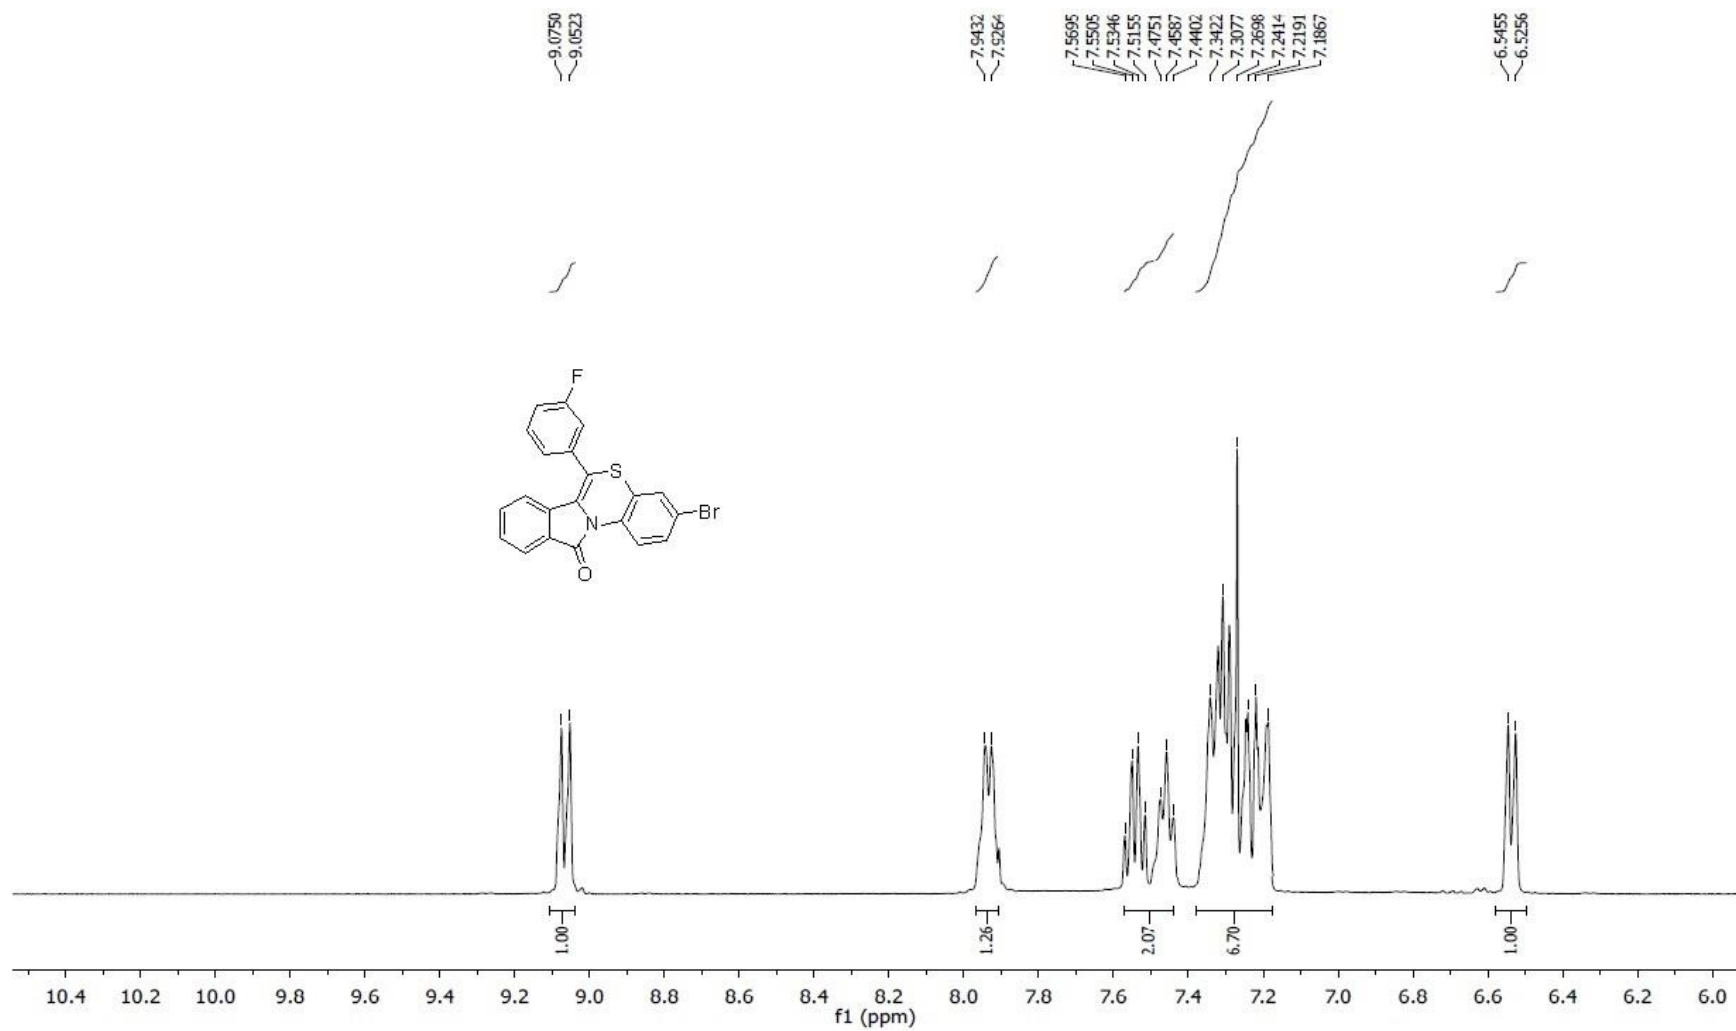



<sup>13</sup>C NMR of 5r

165.1052  
164.5395  
162.0597  
136.1883  
136.1082  
135.9409  
132.8520  
131.9104  
131.5875  
131.5038  
130.5906  
130.5135  
128.8389  
128.2214  
127.7279  
125.4114  
125.3806  
123.2690  
121.9268  
121.8477  
120.6298  
118.0596  
117.3262  
117.1183  
116.8989  
116.6796  
115.8050  
77.3471  
77.0297  
76.7122

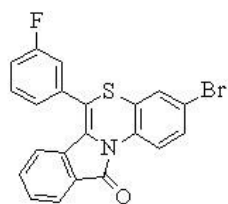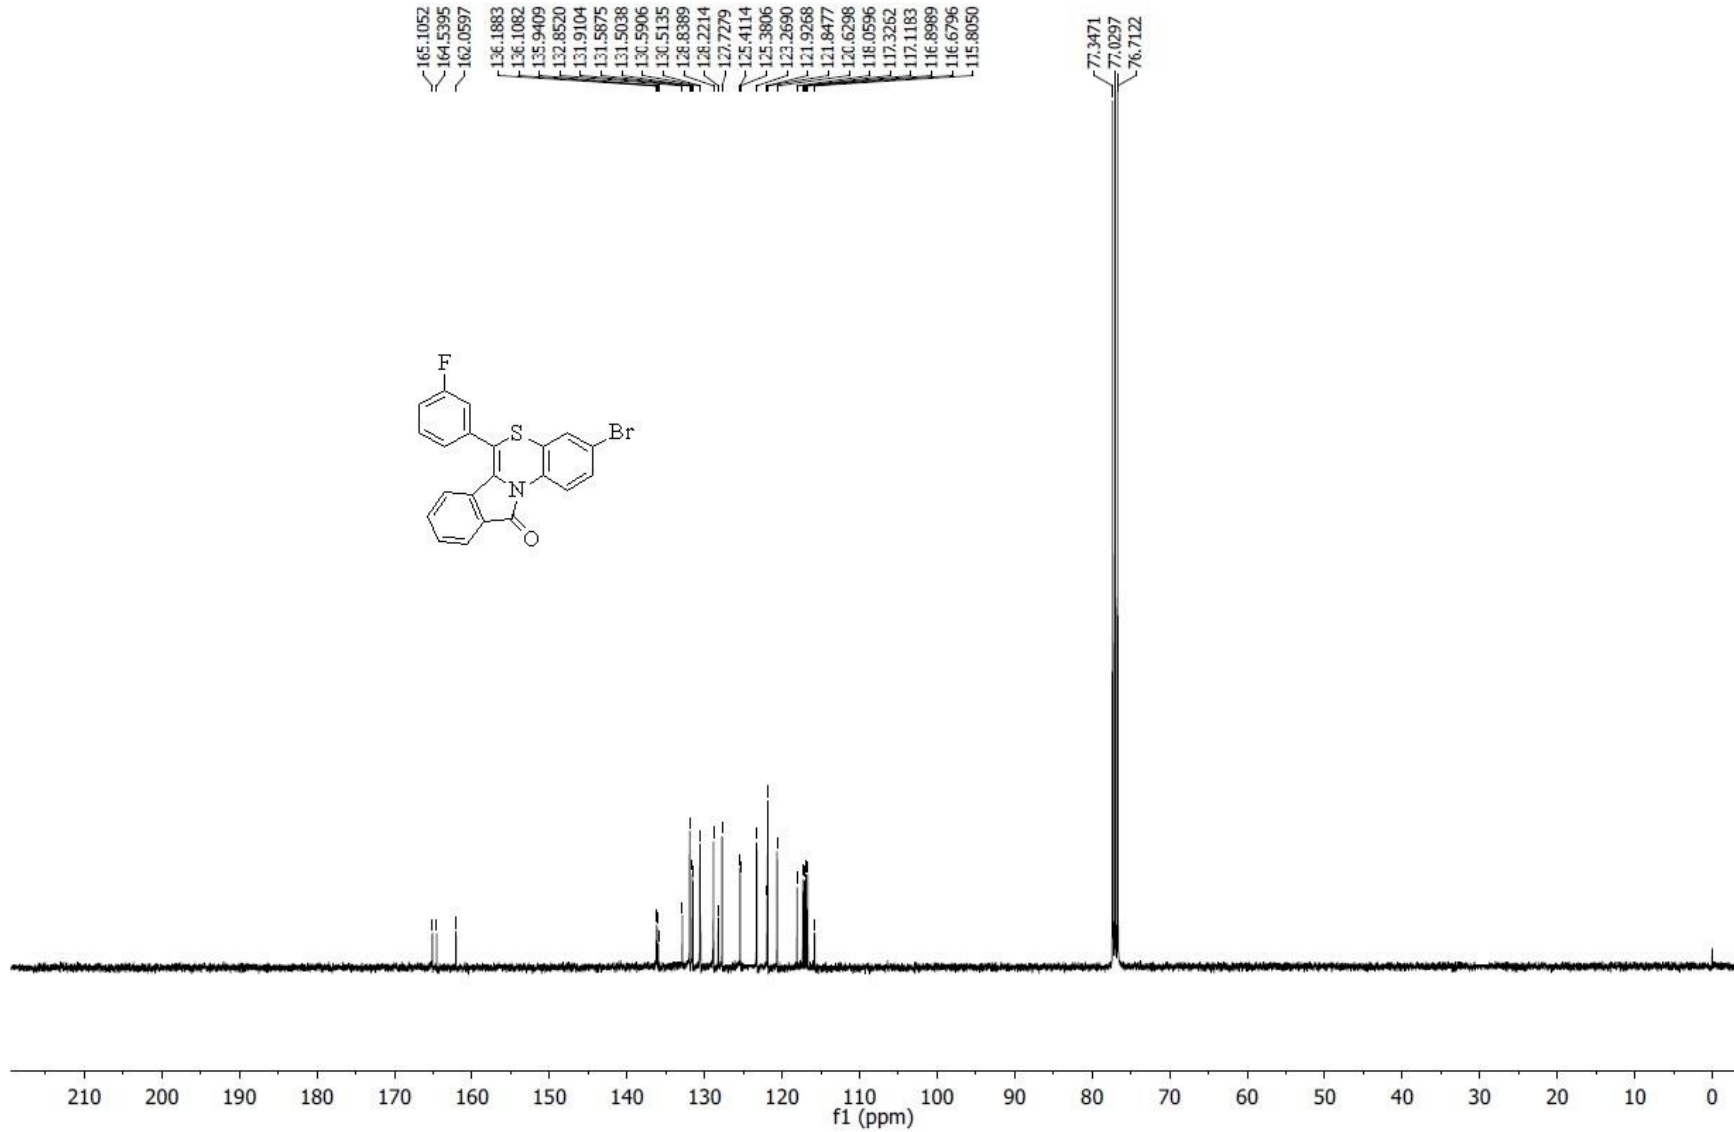

<sup>13</sup>C NMR of 5r

165.1052  
164.5395  
162.0697

136.1883  
136.1082  
135.9409  
132.8520  
131.9104  
131.5875  
131.5038  
130.5906  
130.5135  
128.8389  
128.7214  
127.7279  
125.4114  
125.3806  
123.2690  
121.9768  
121.8477  
120.6298  
118.0596  
117.3262  
117.1183  
116.8889  
116.6796  
115.8050

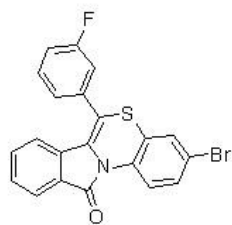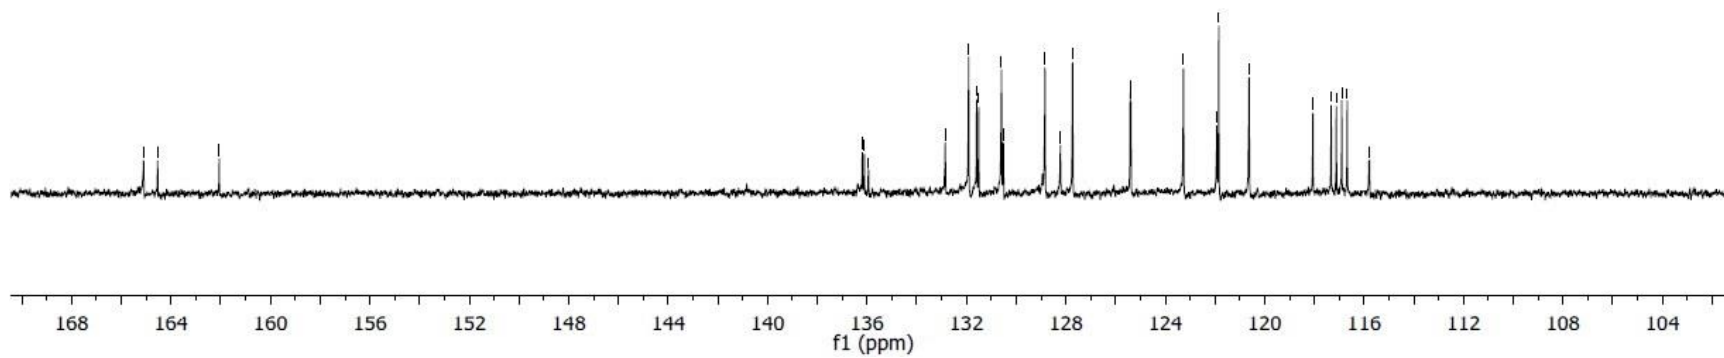



DEPT of 5b

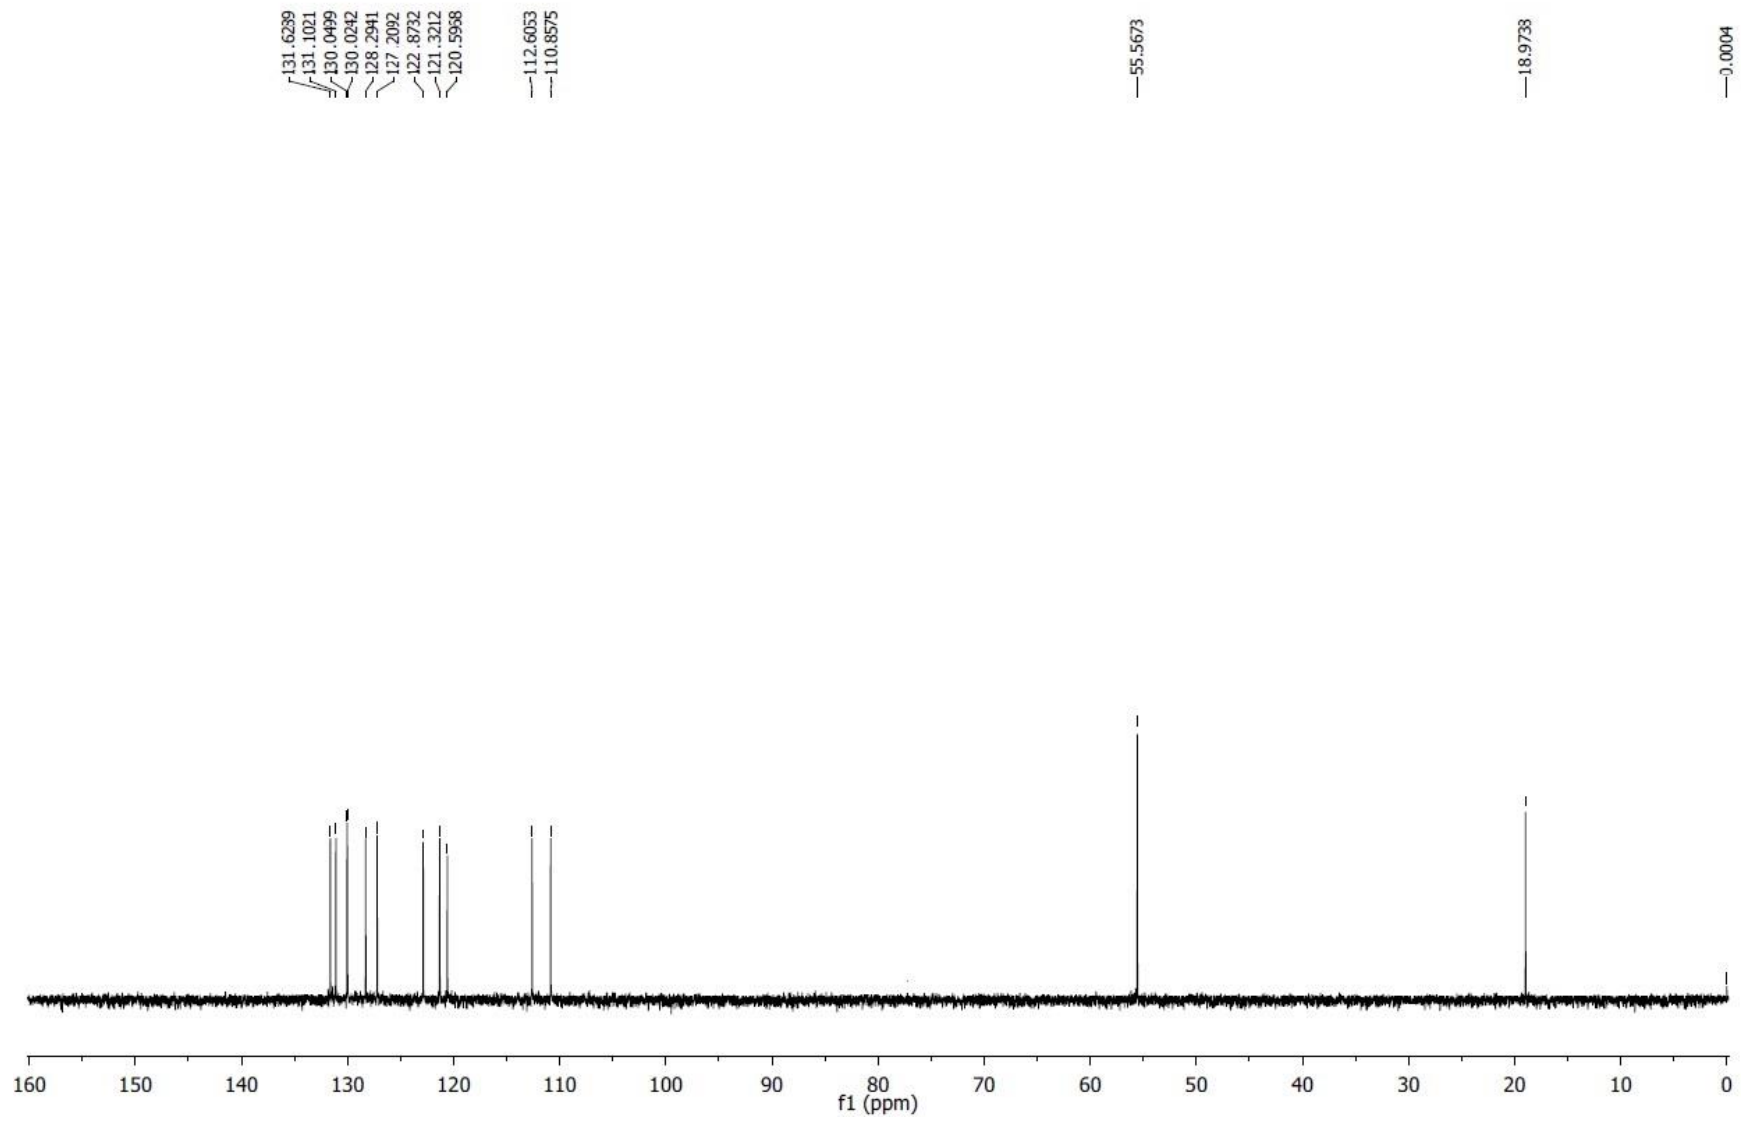

HMBC of 5b

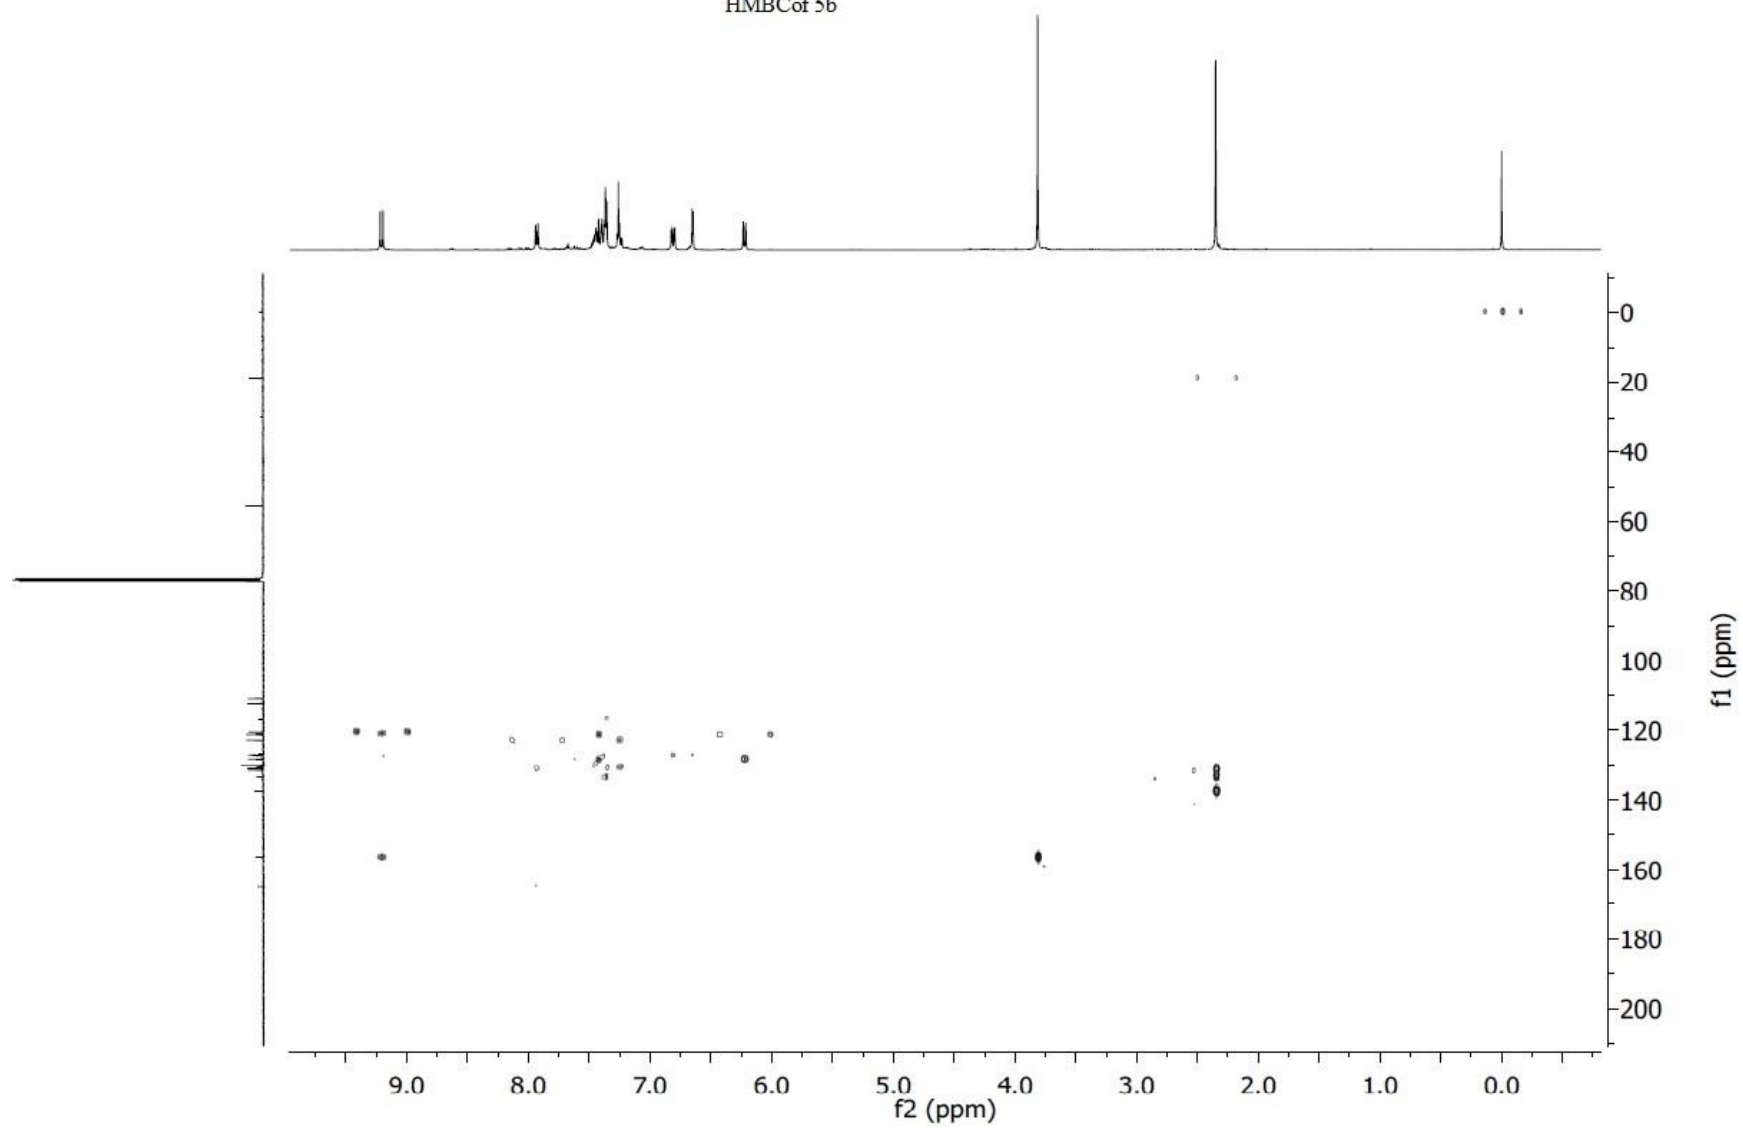

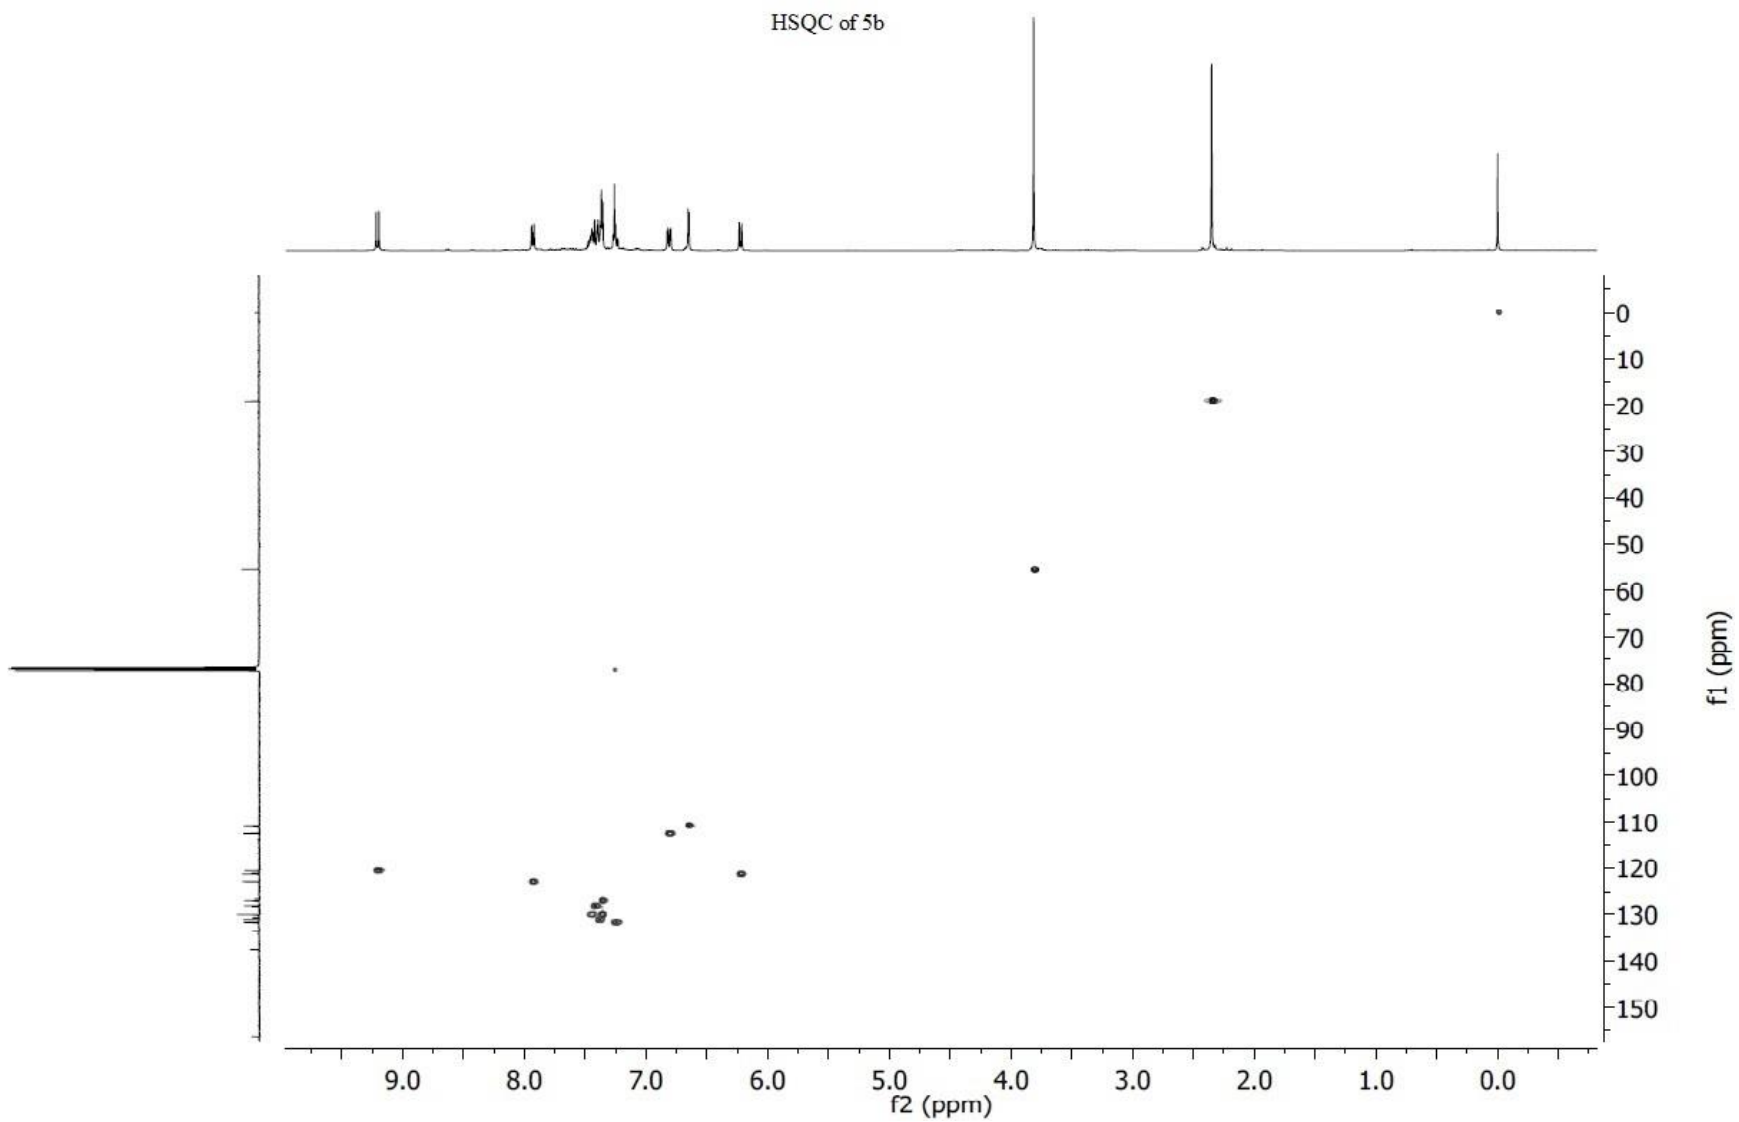

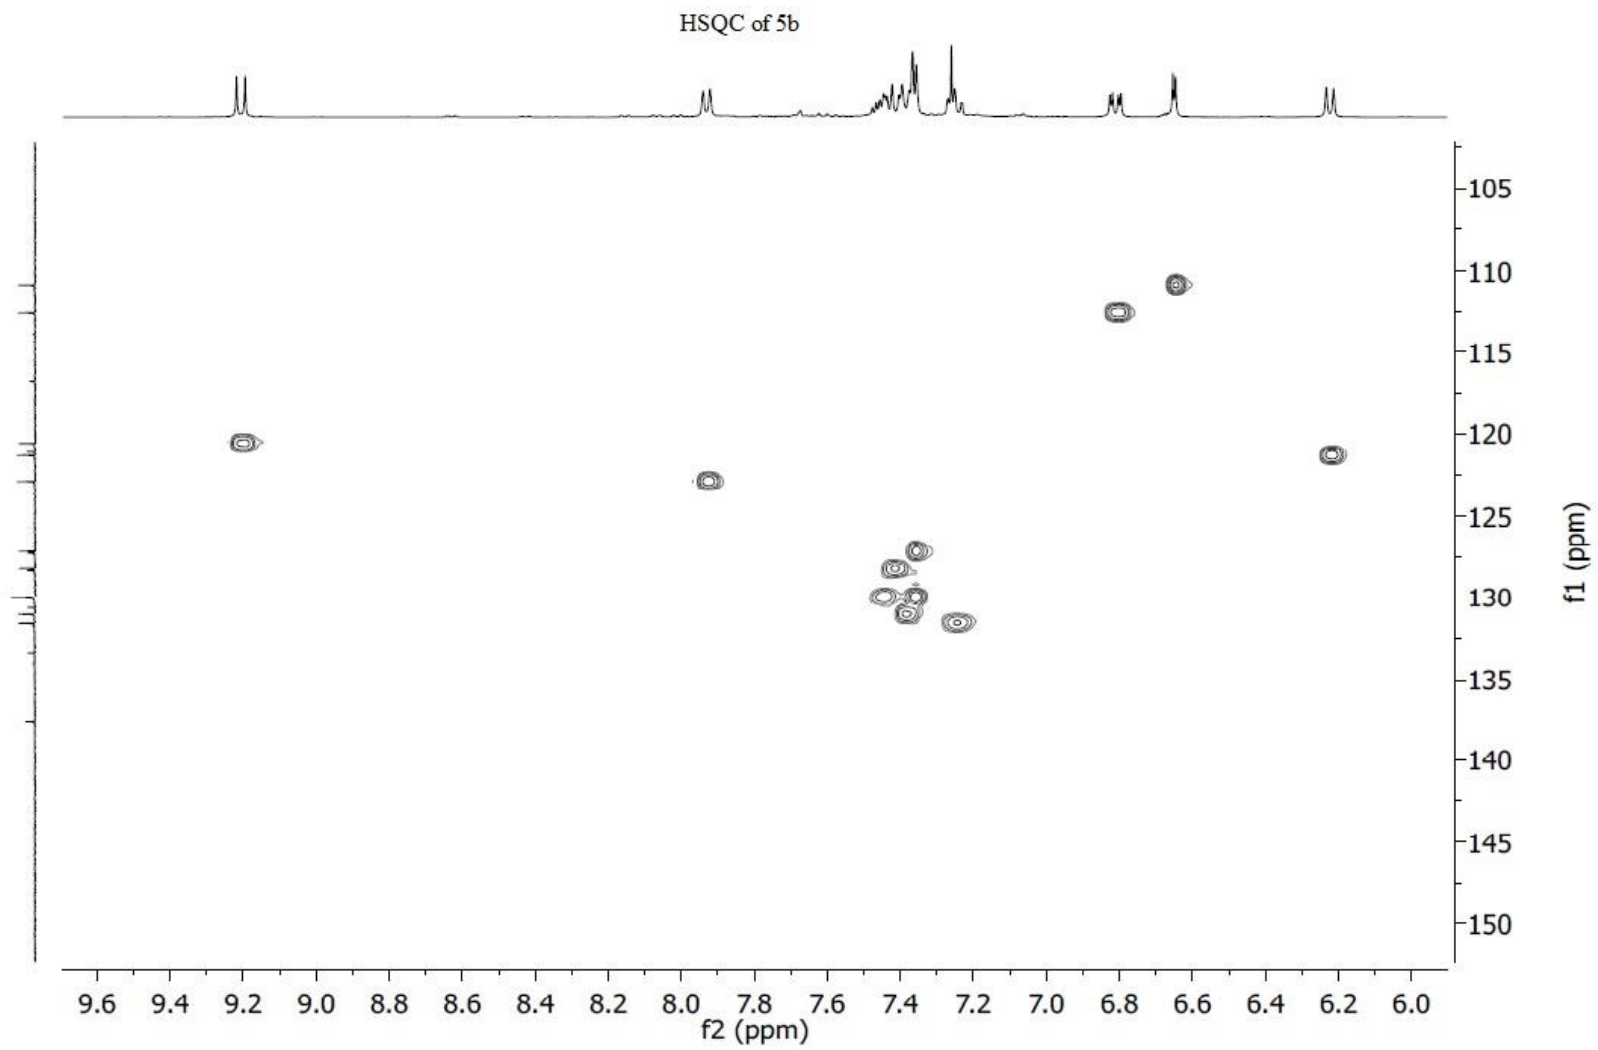

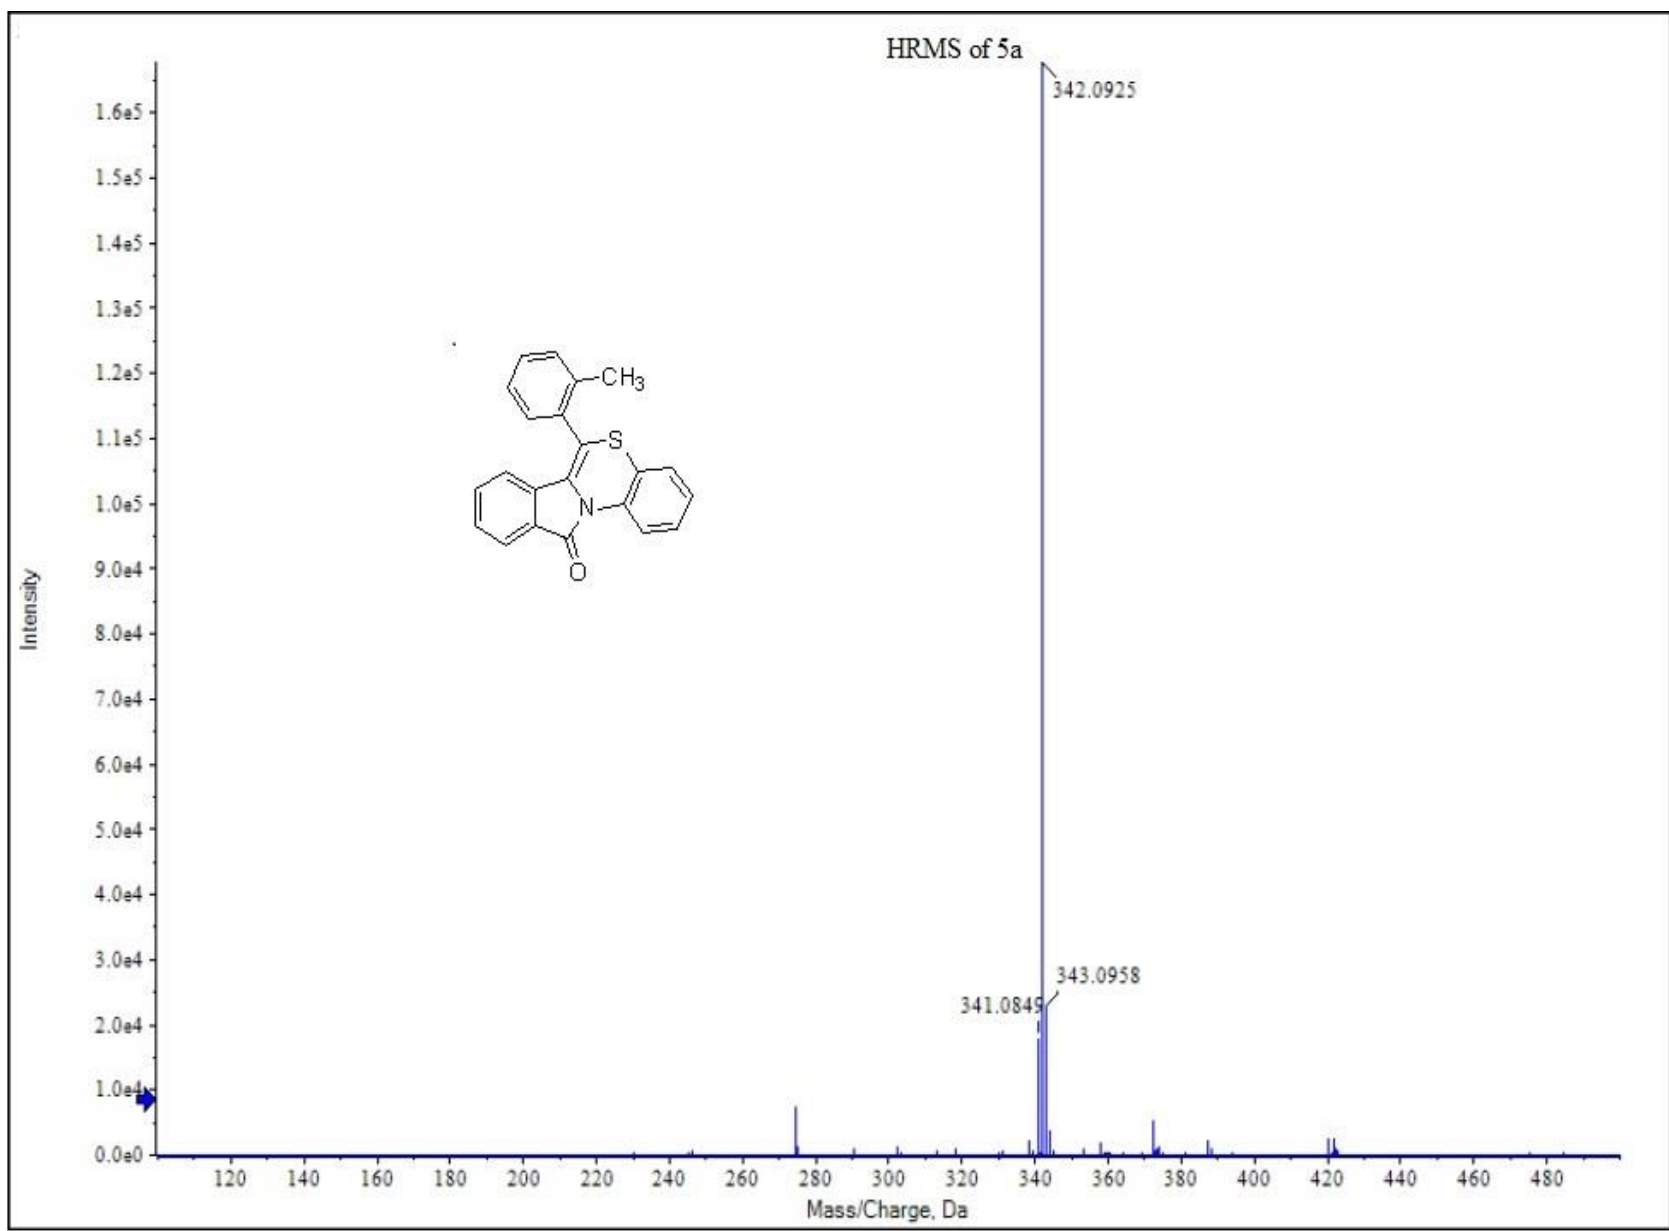



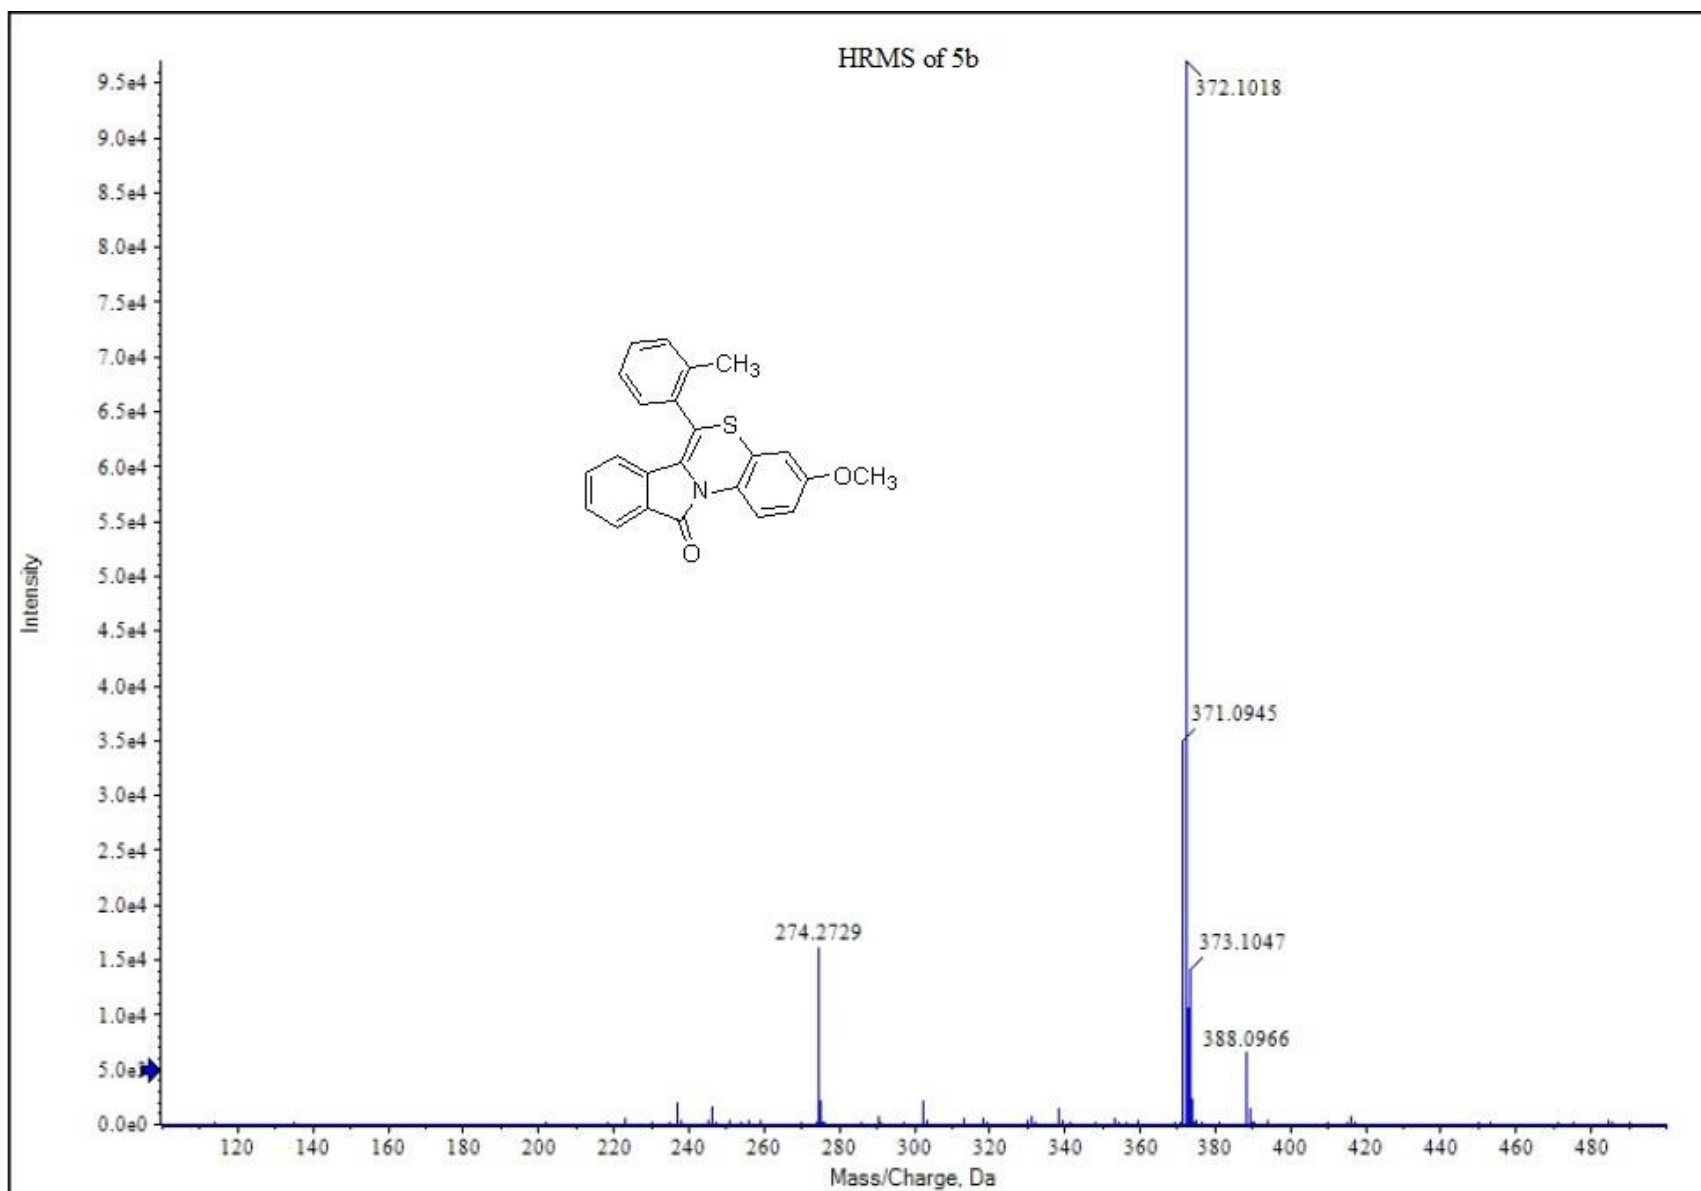

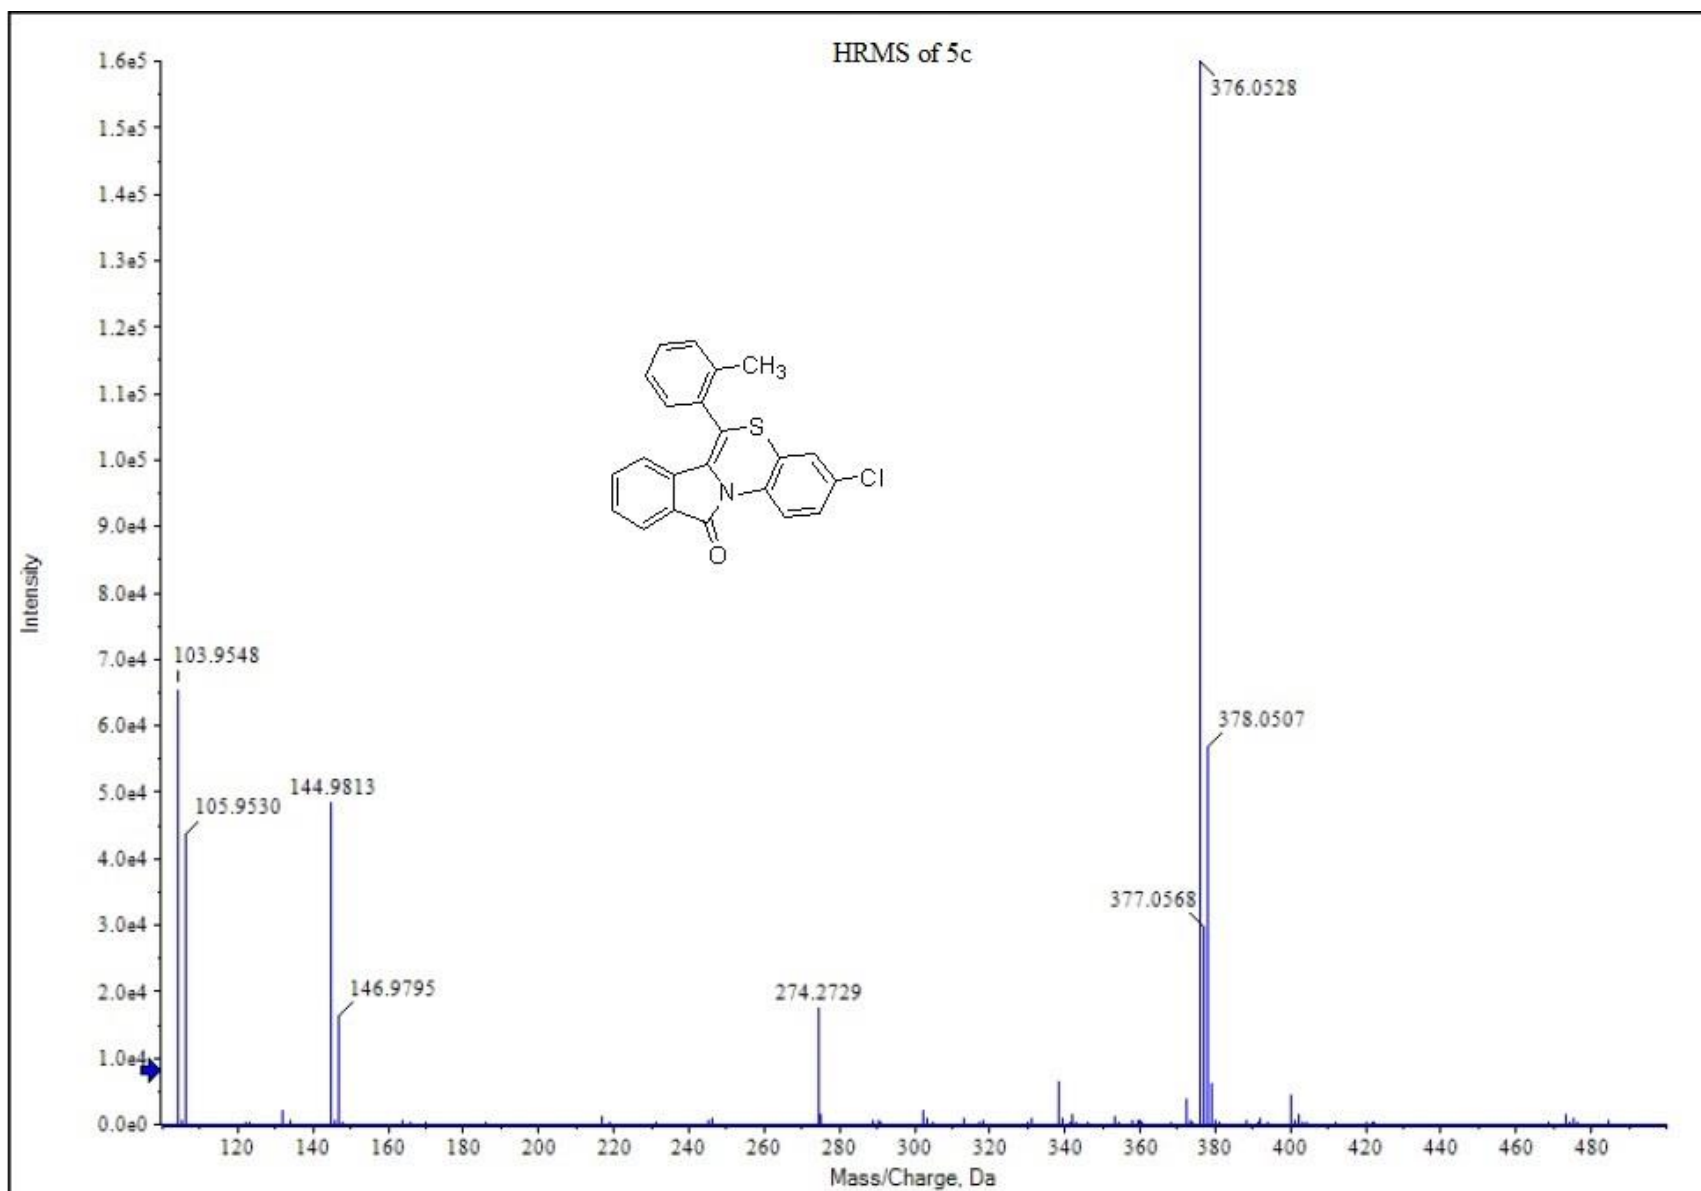

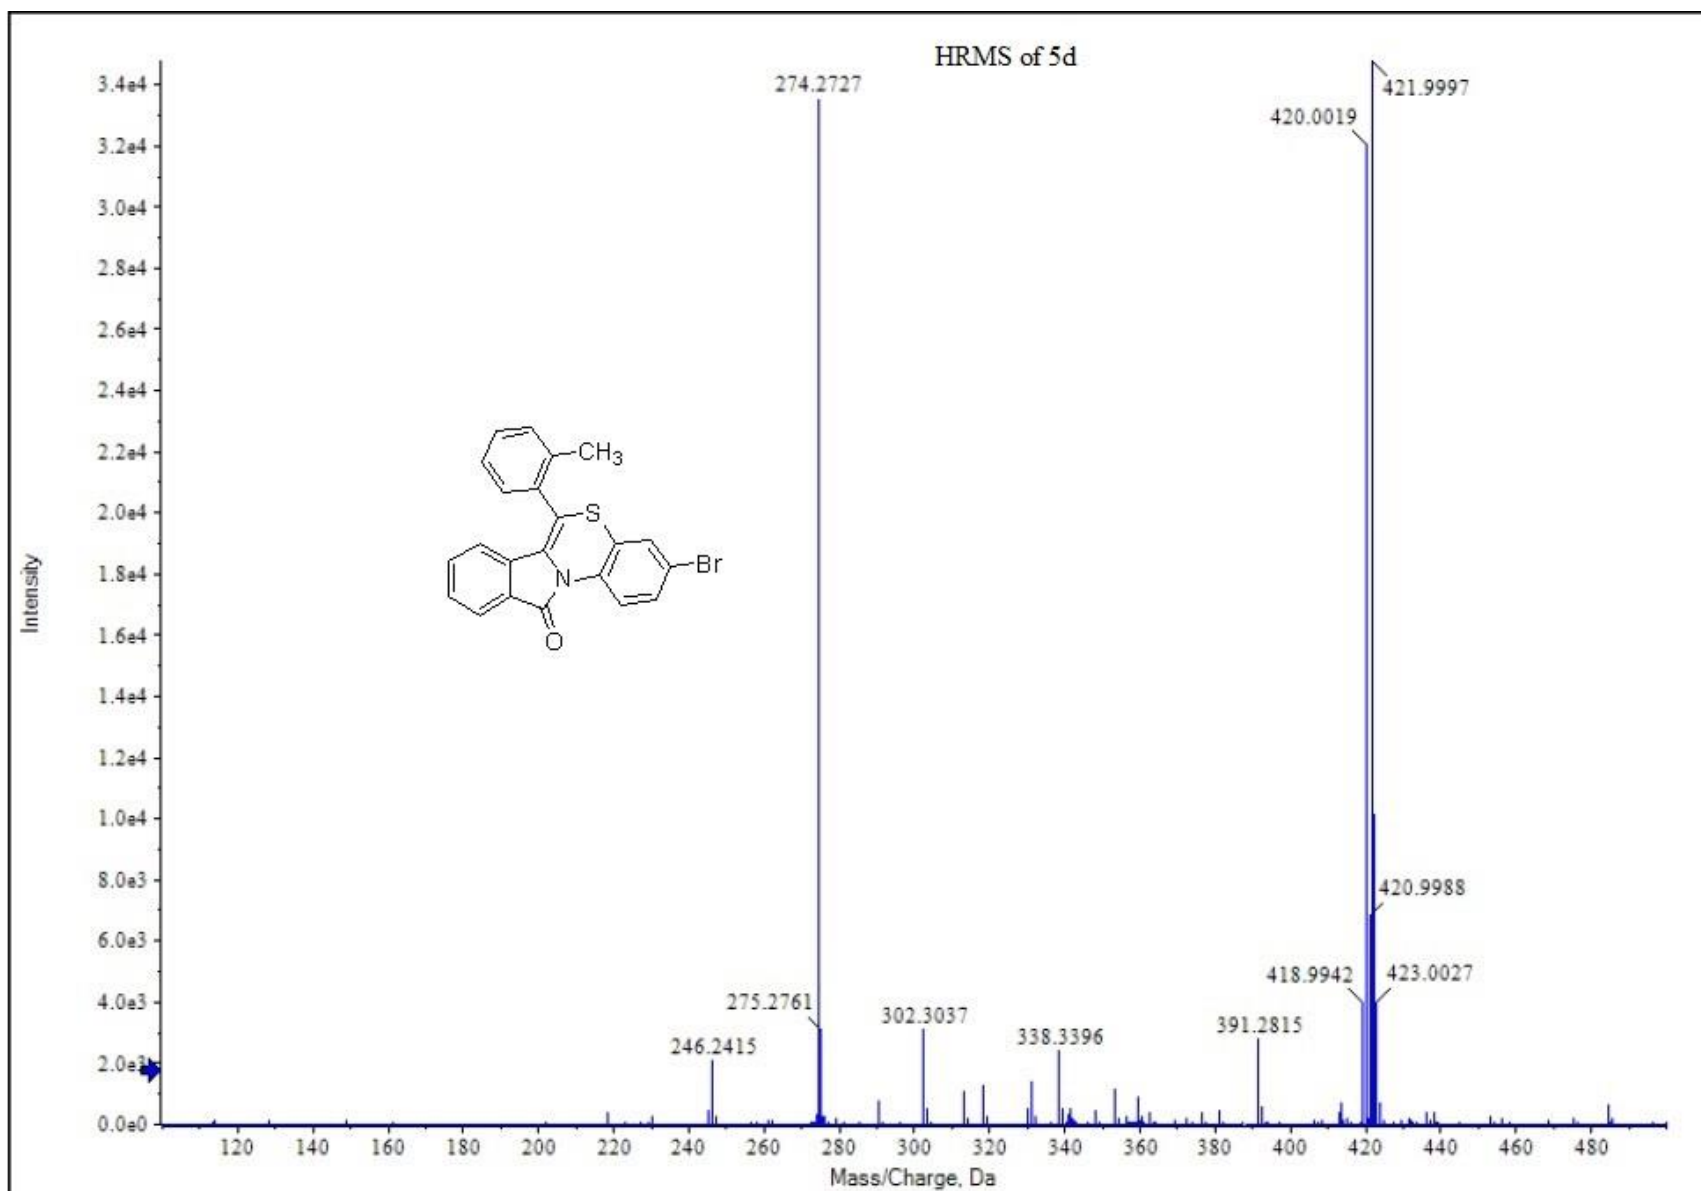

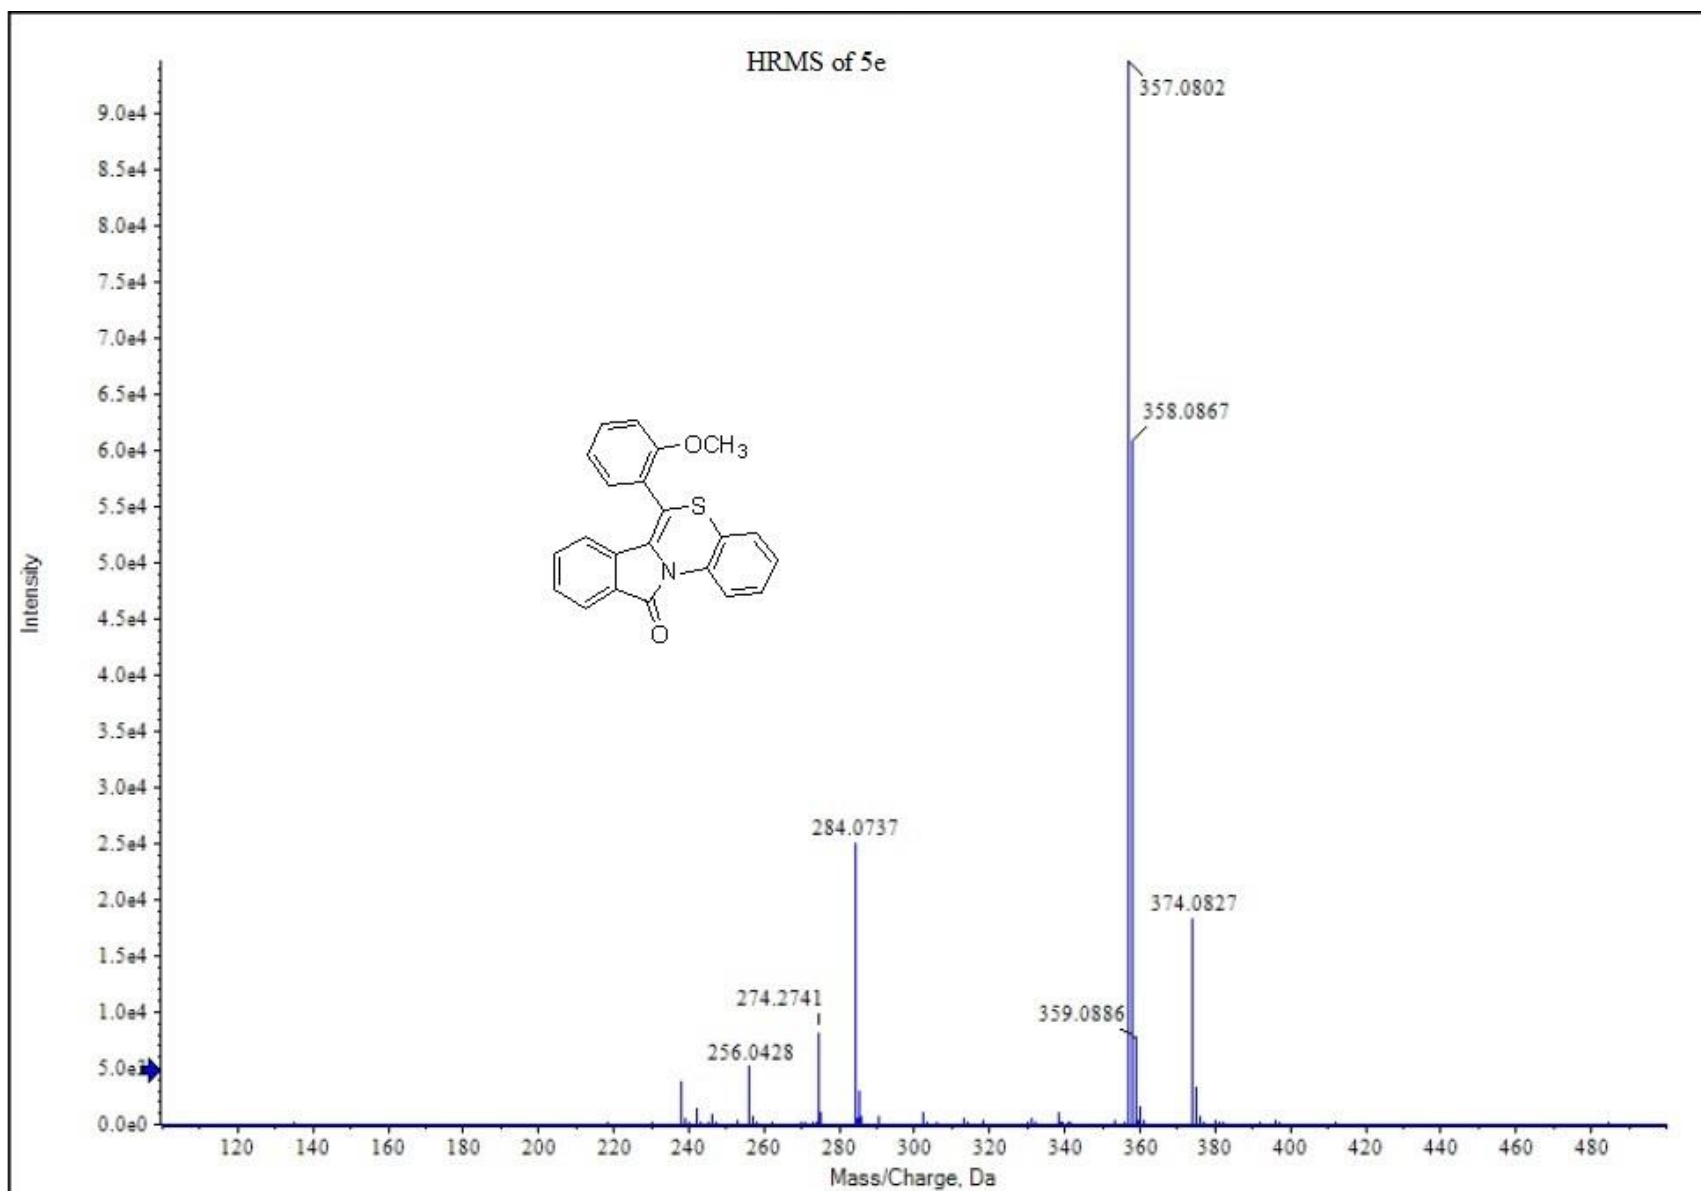

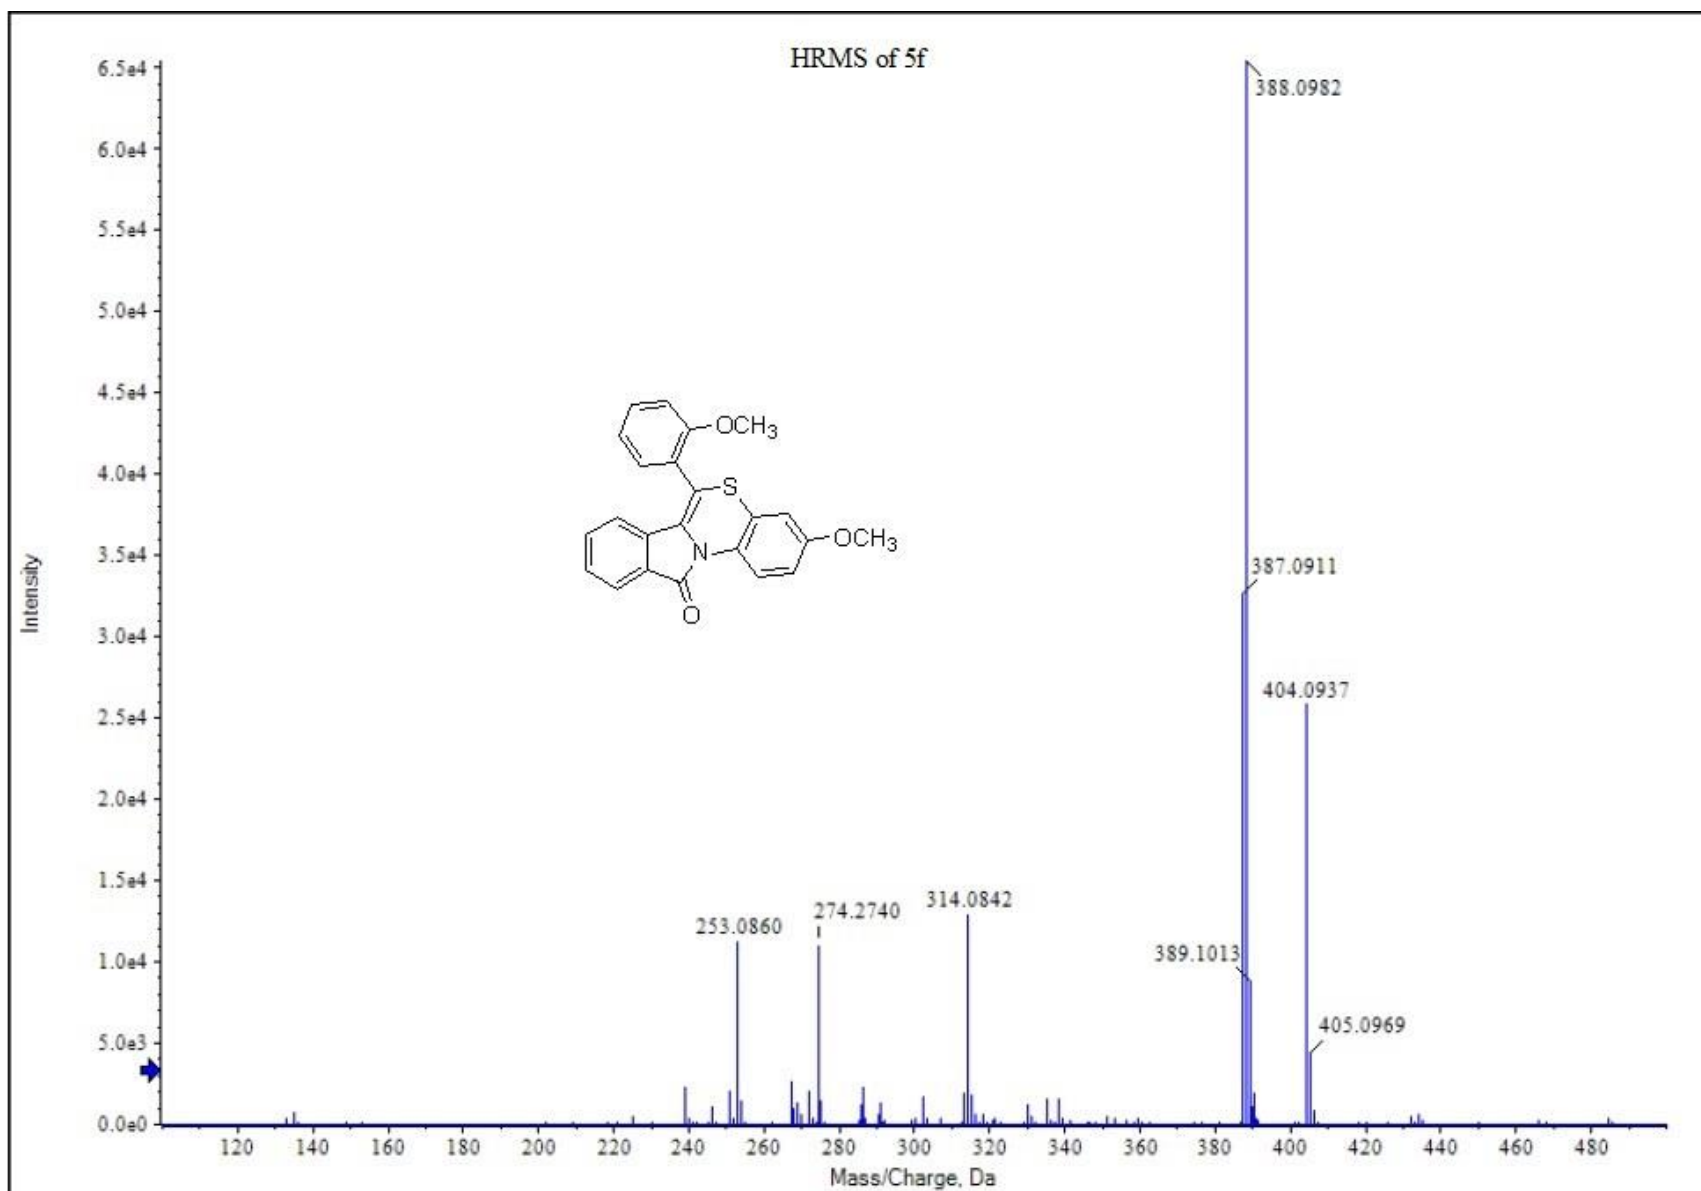

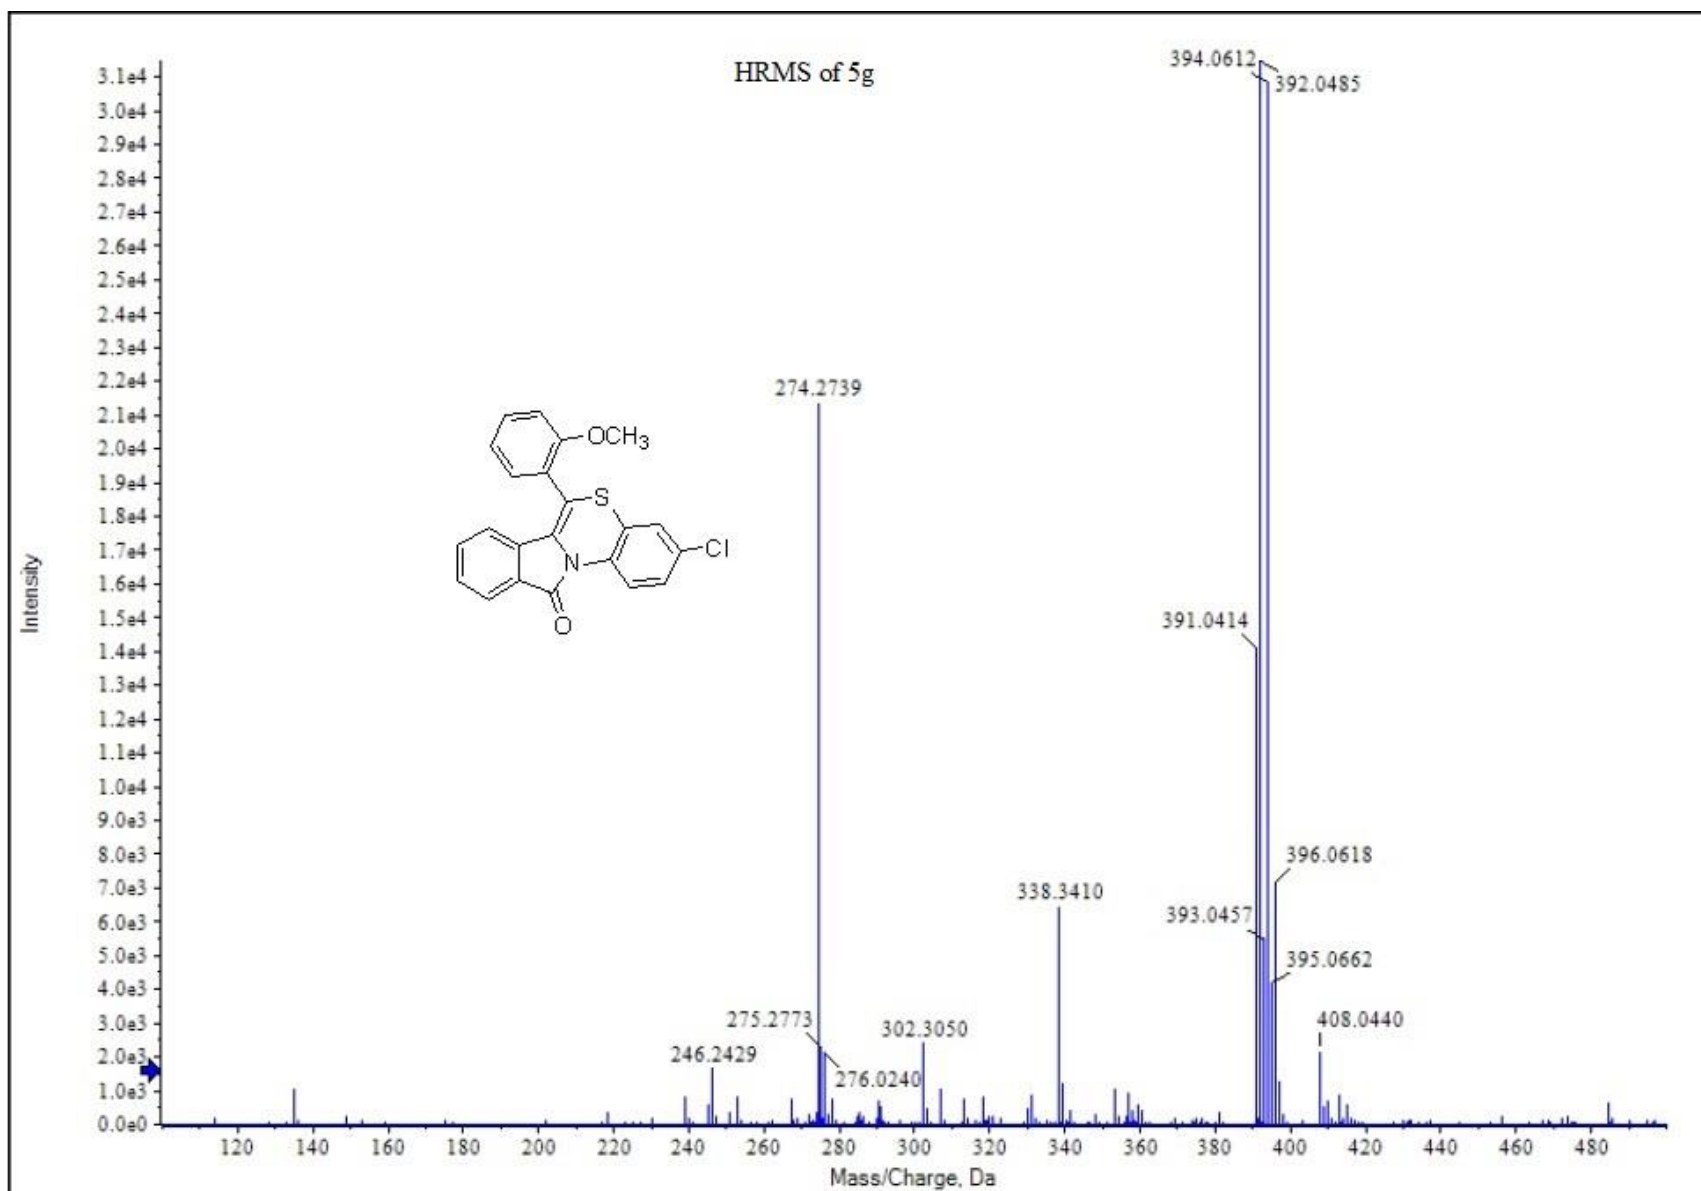

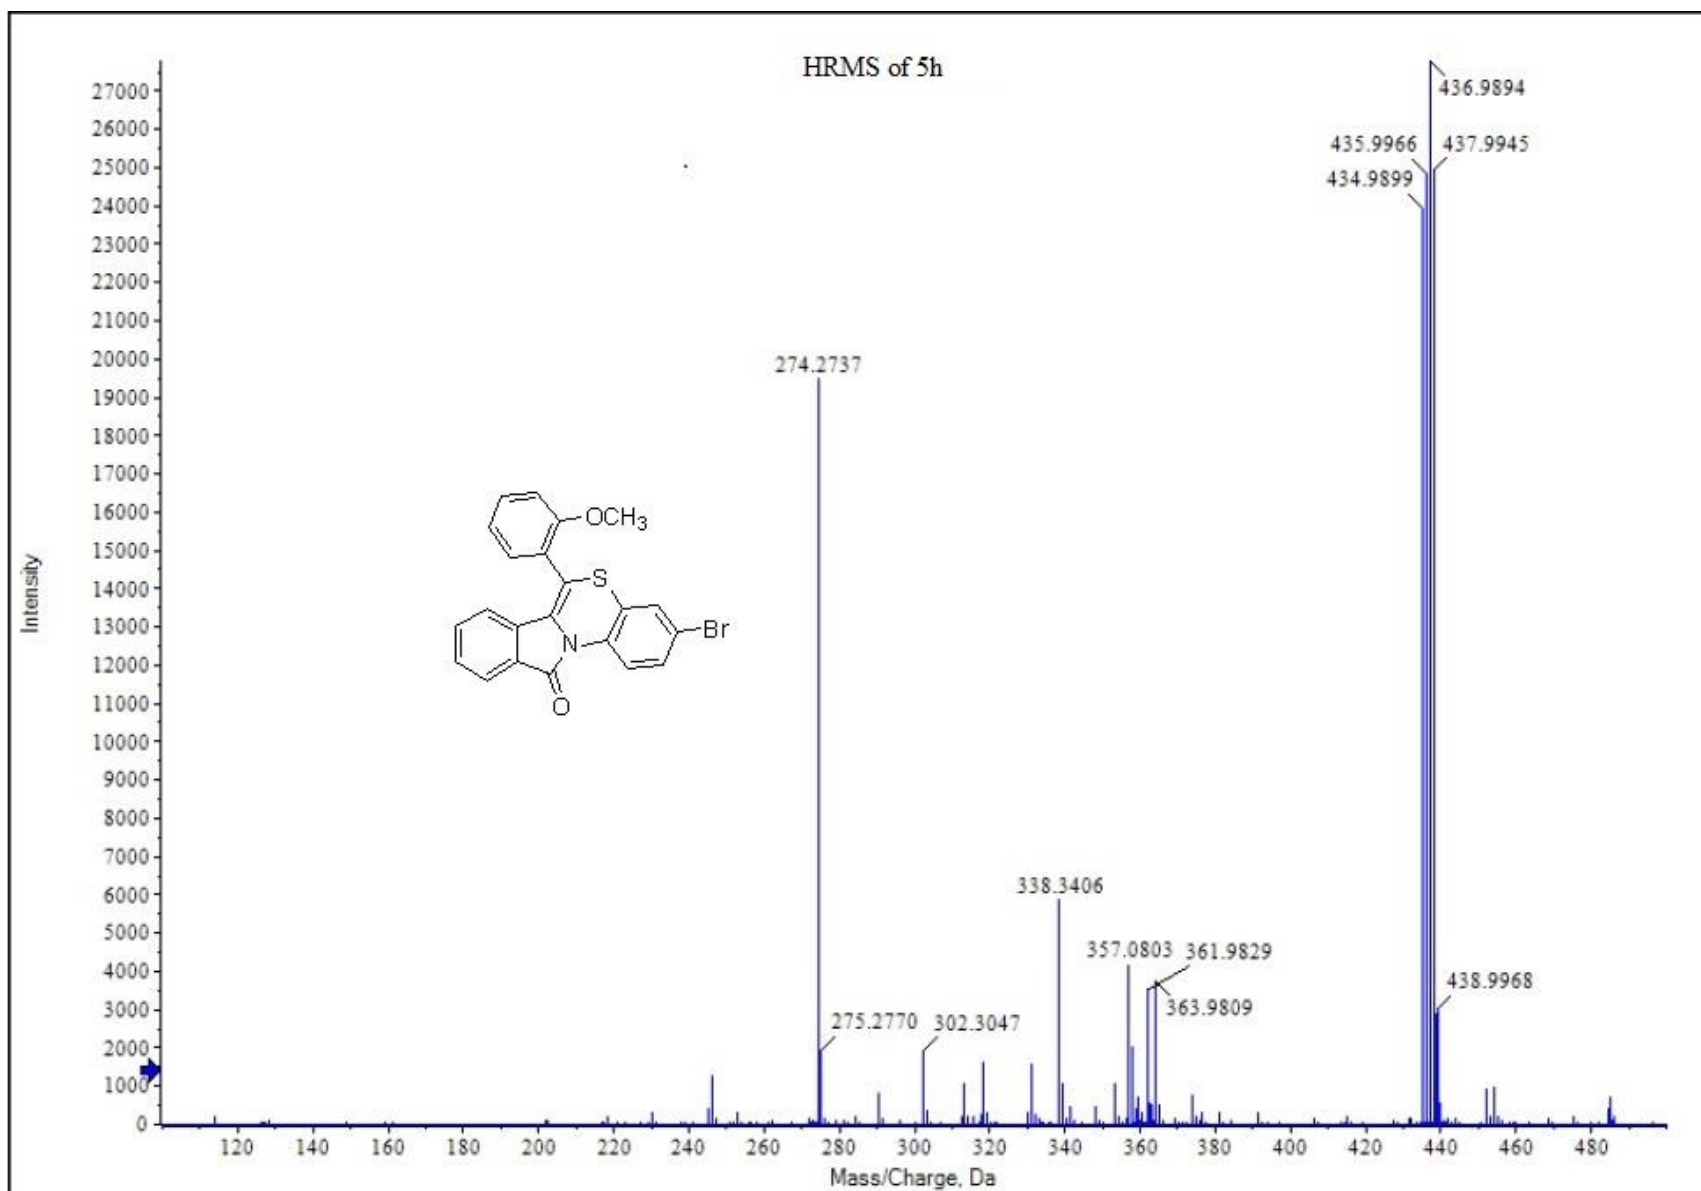

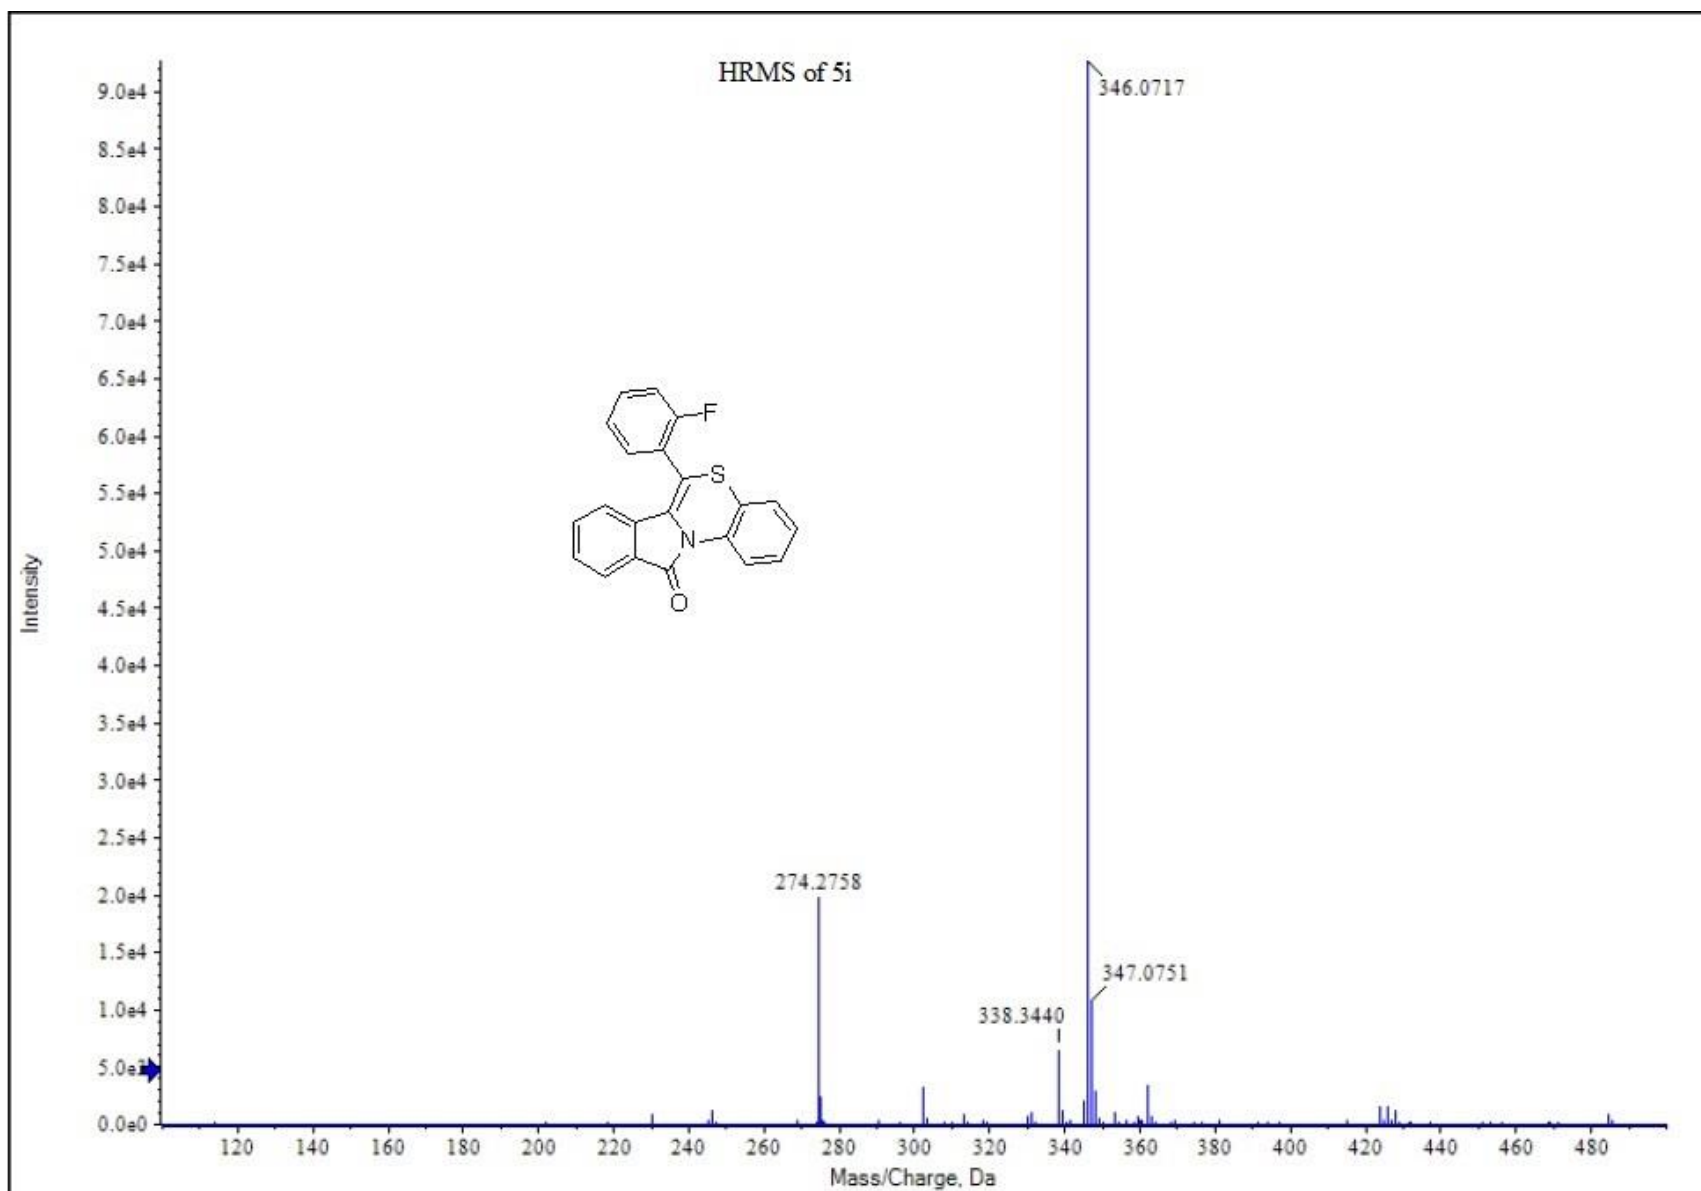



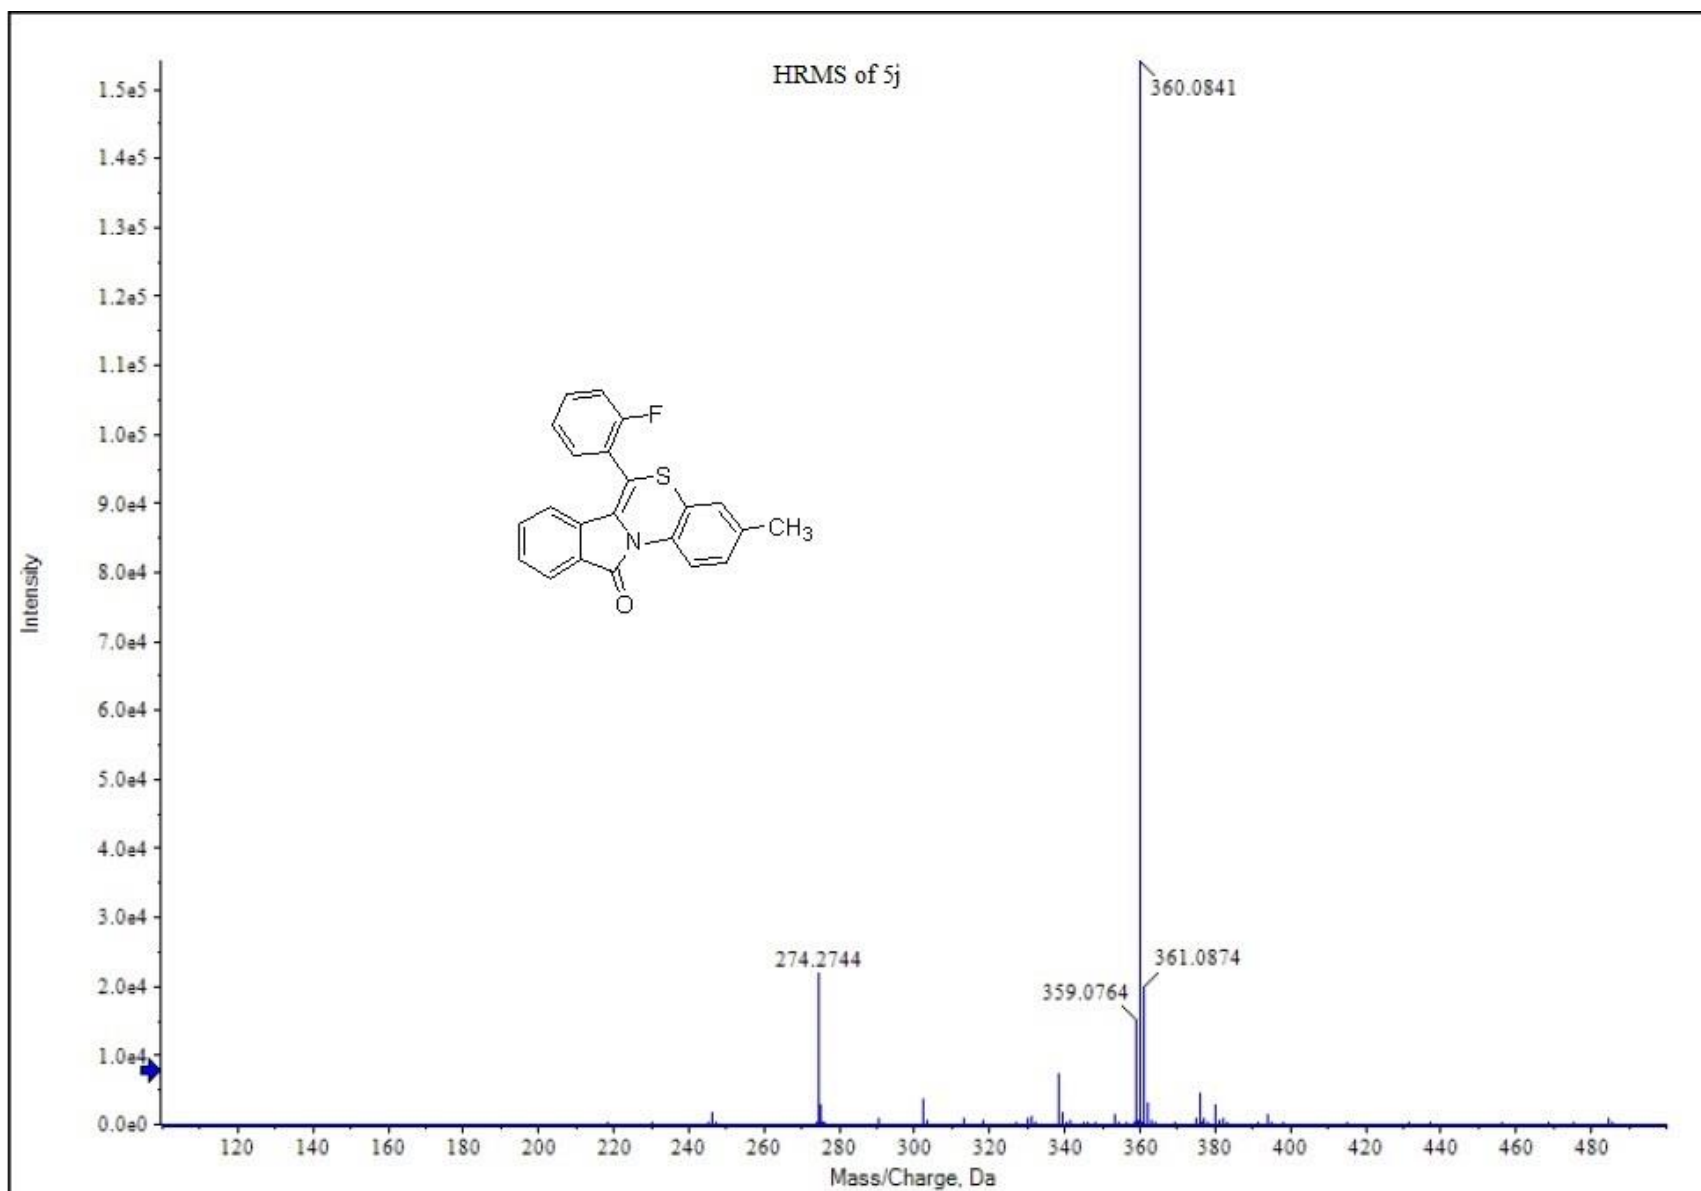

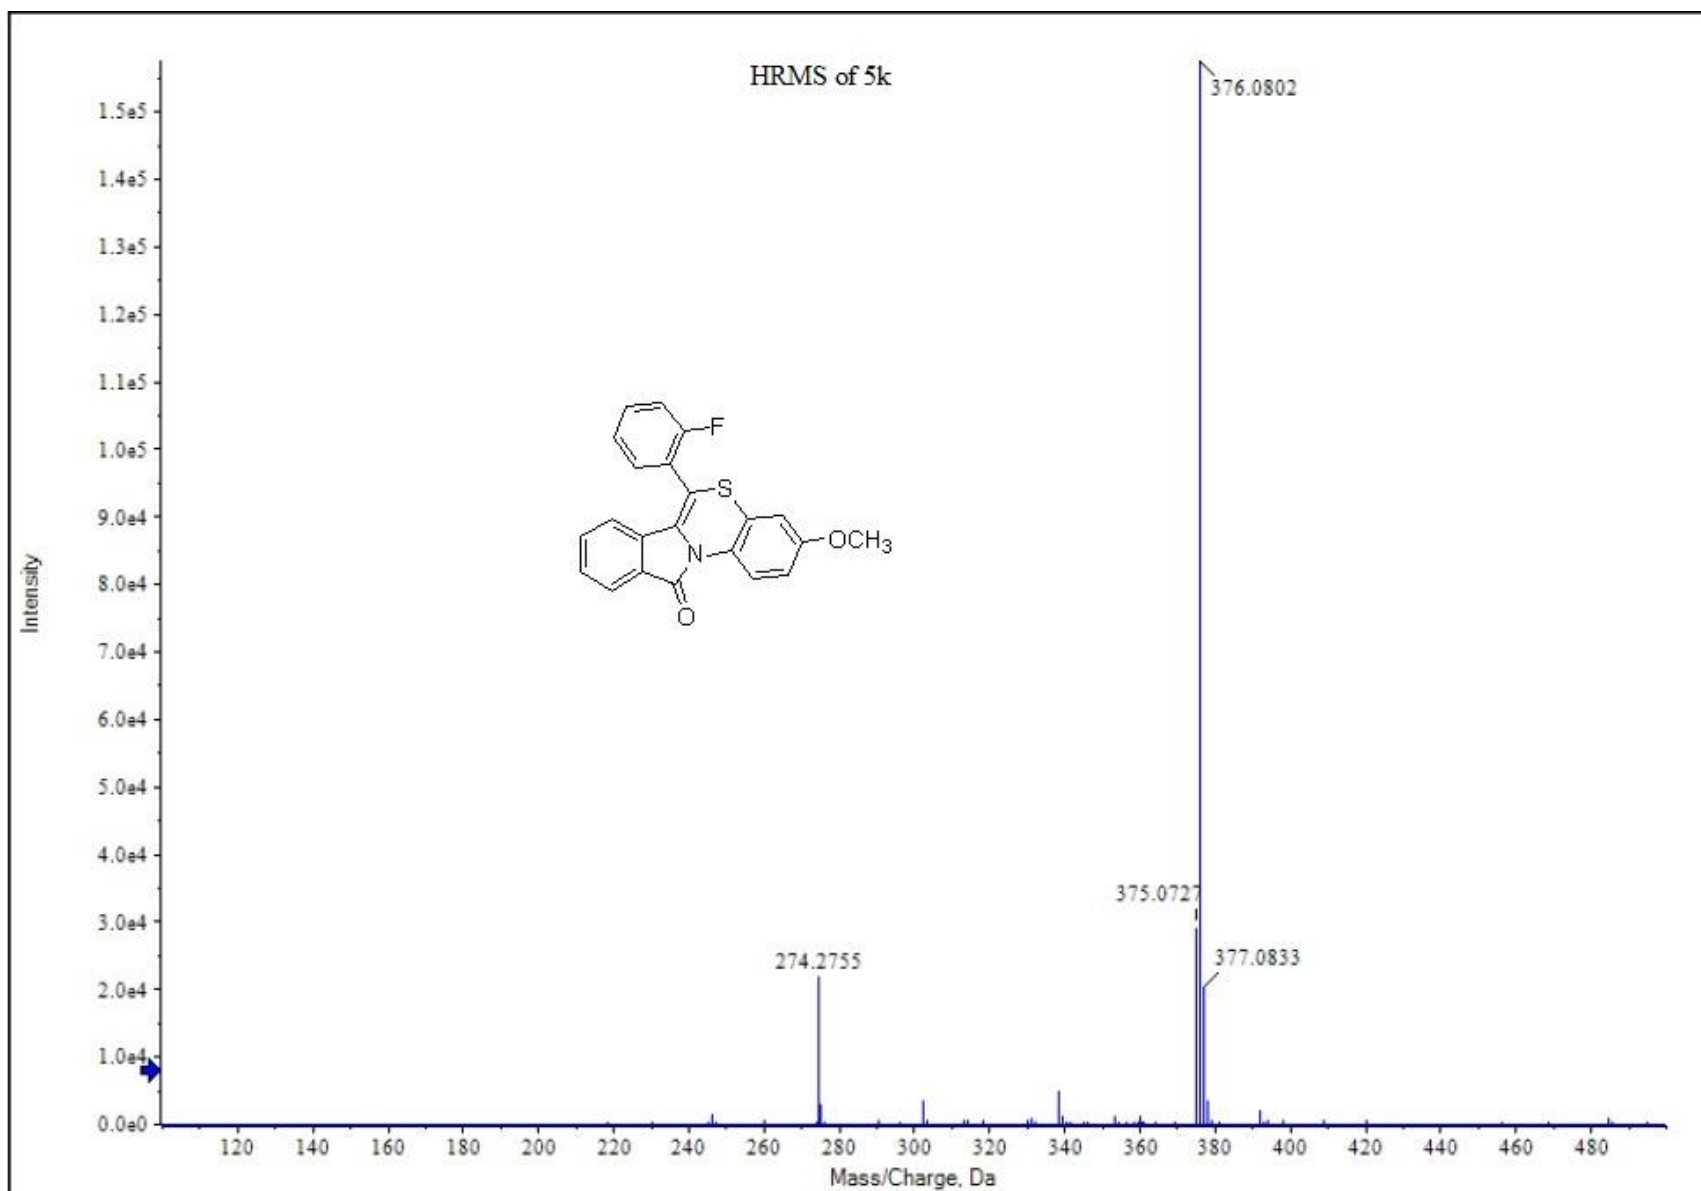

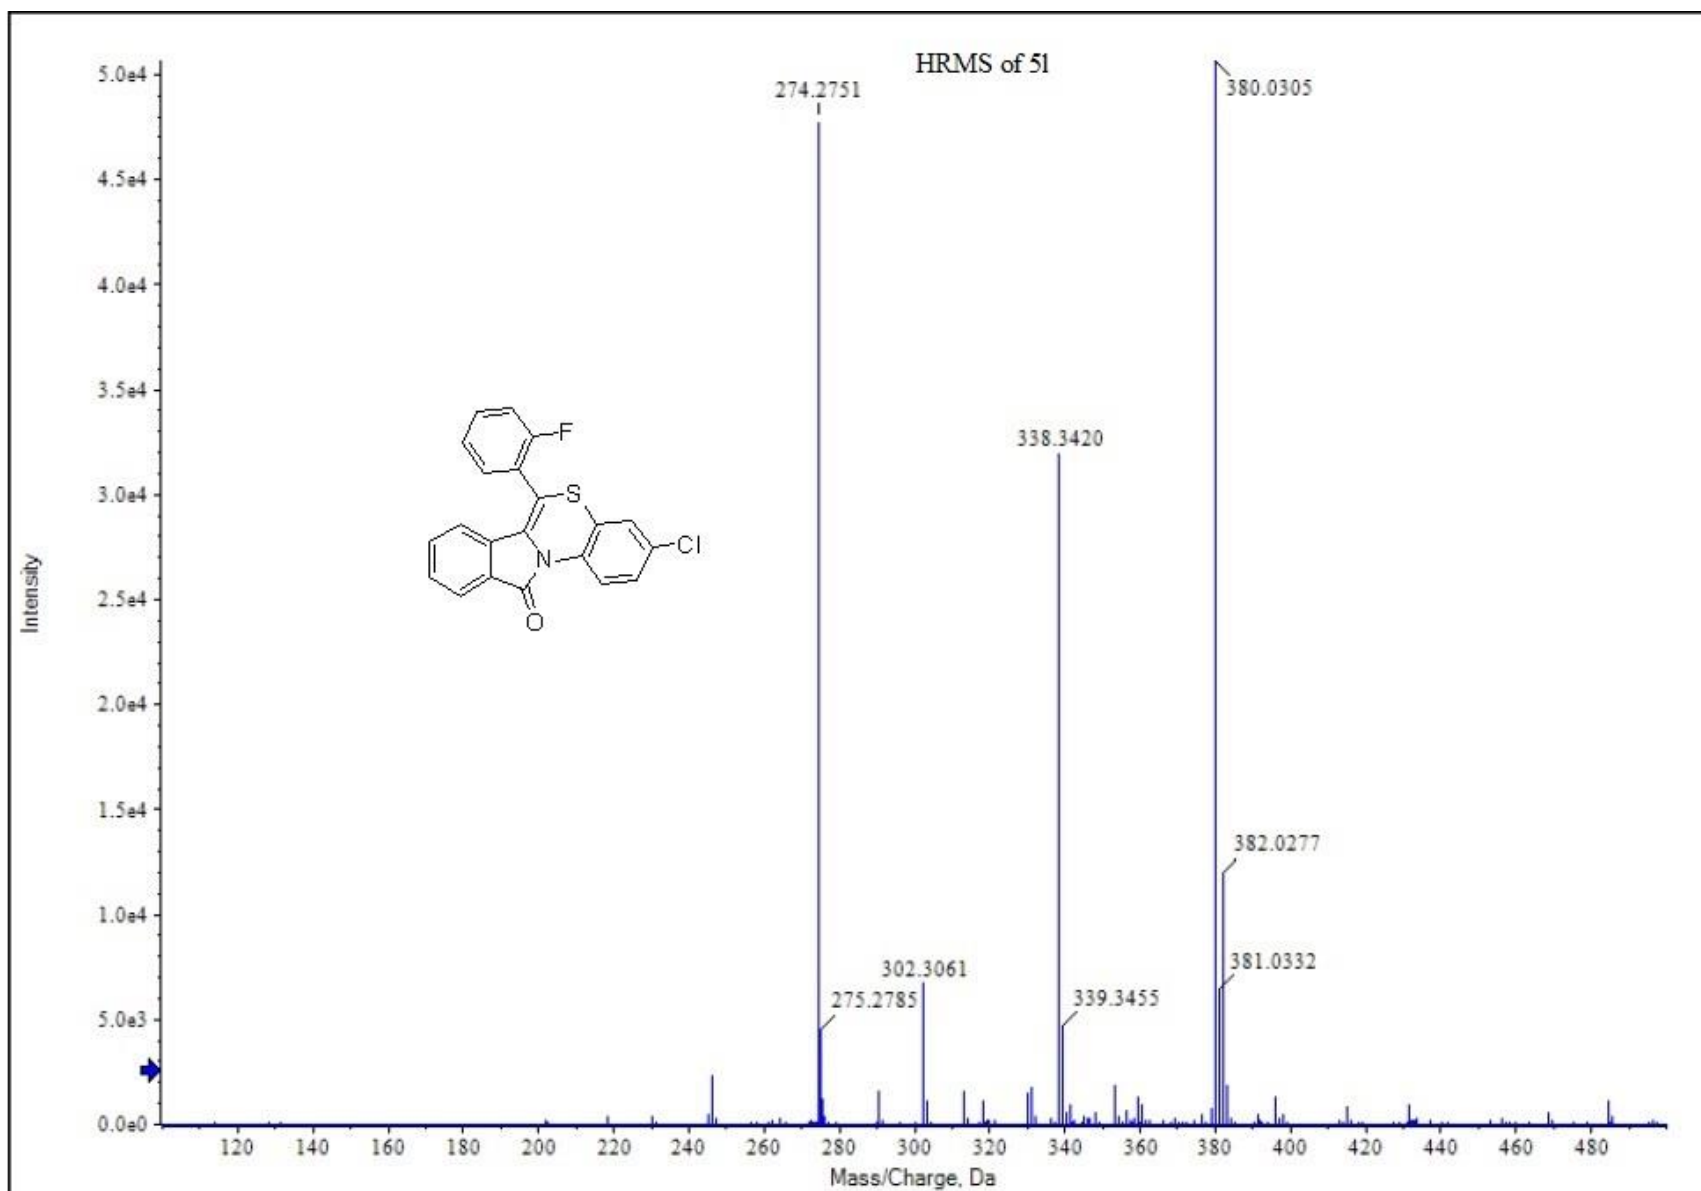

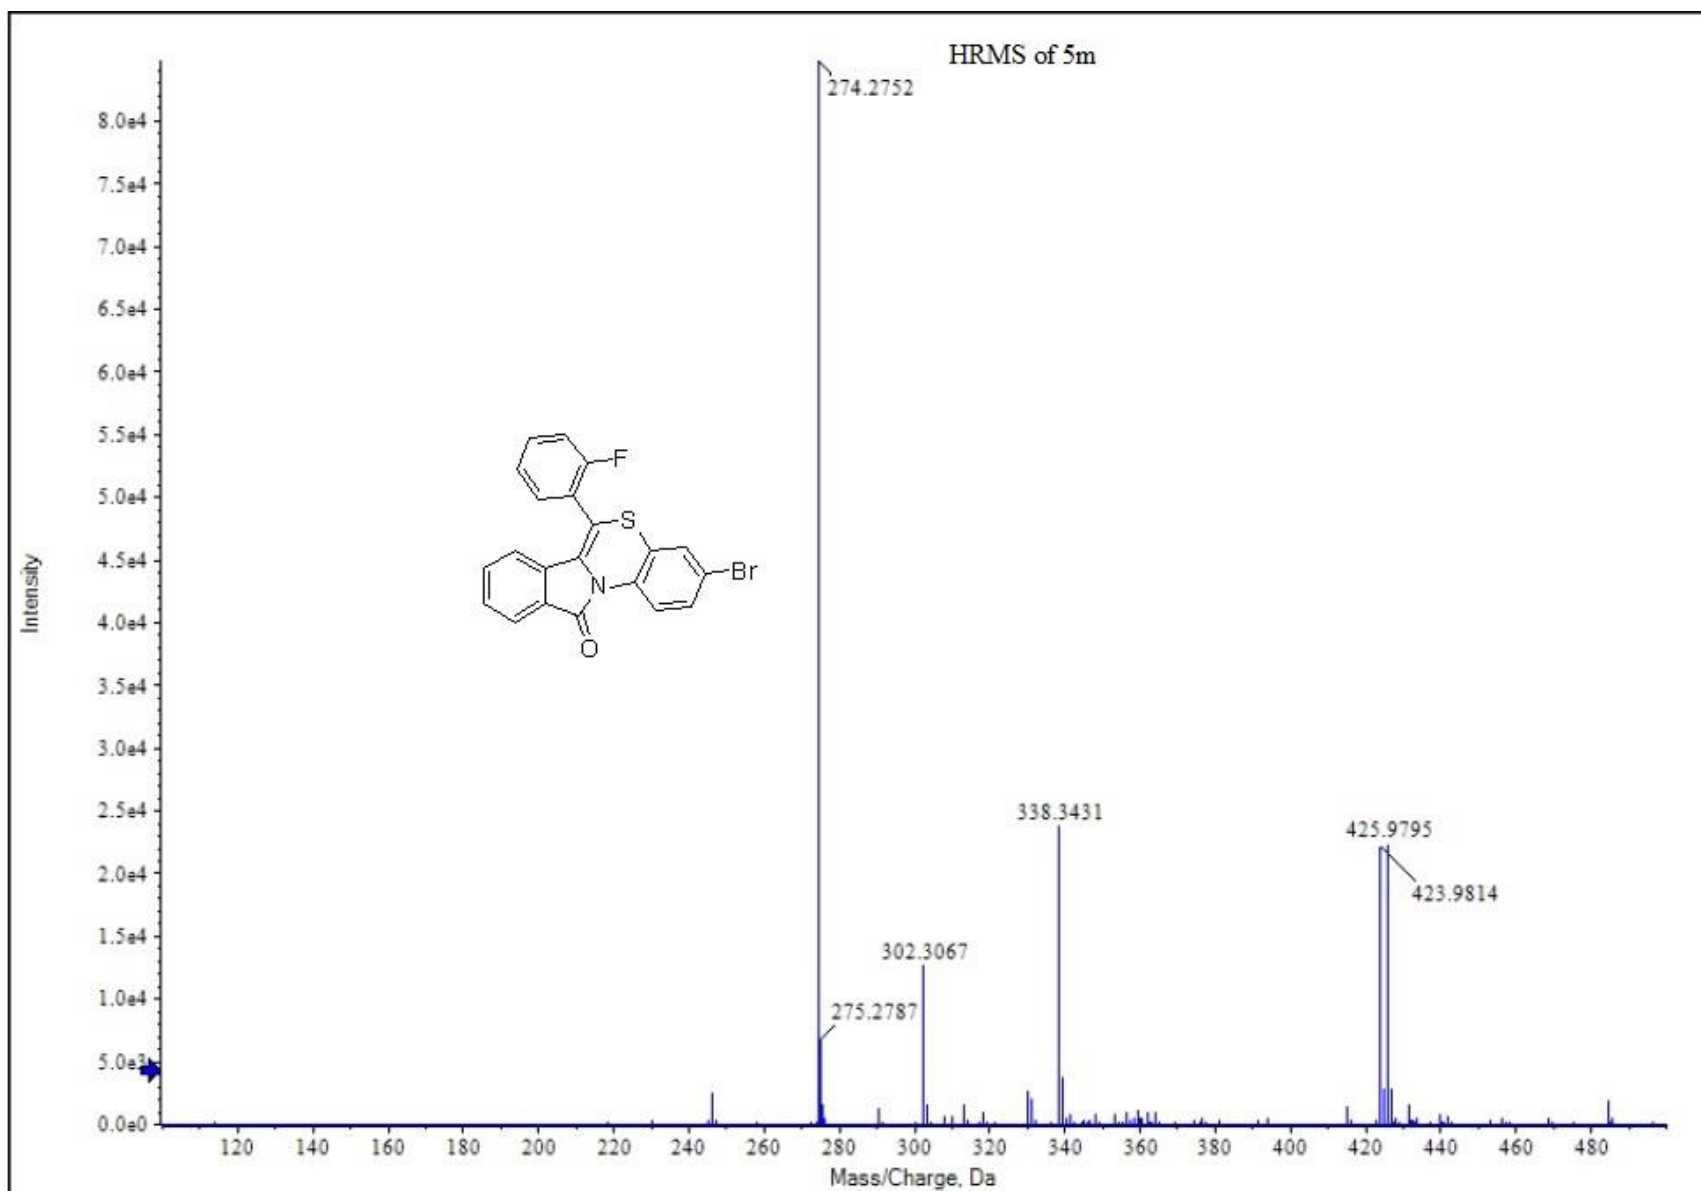

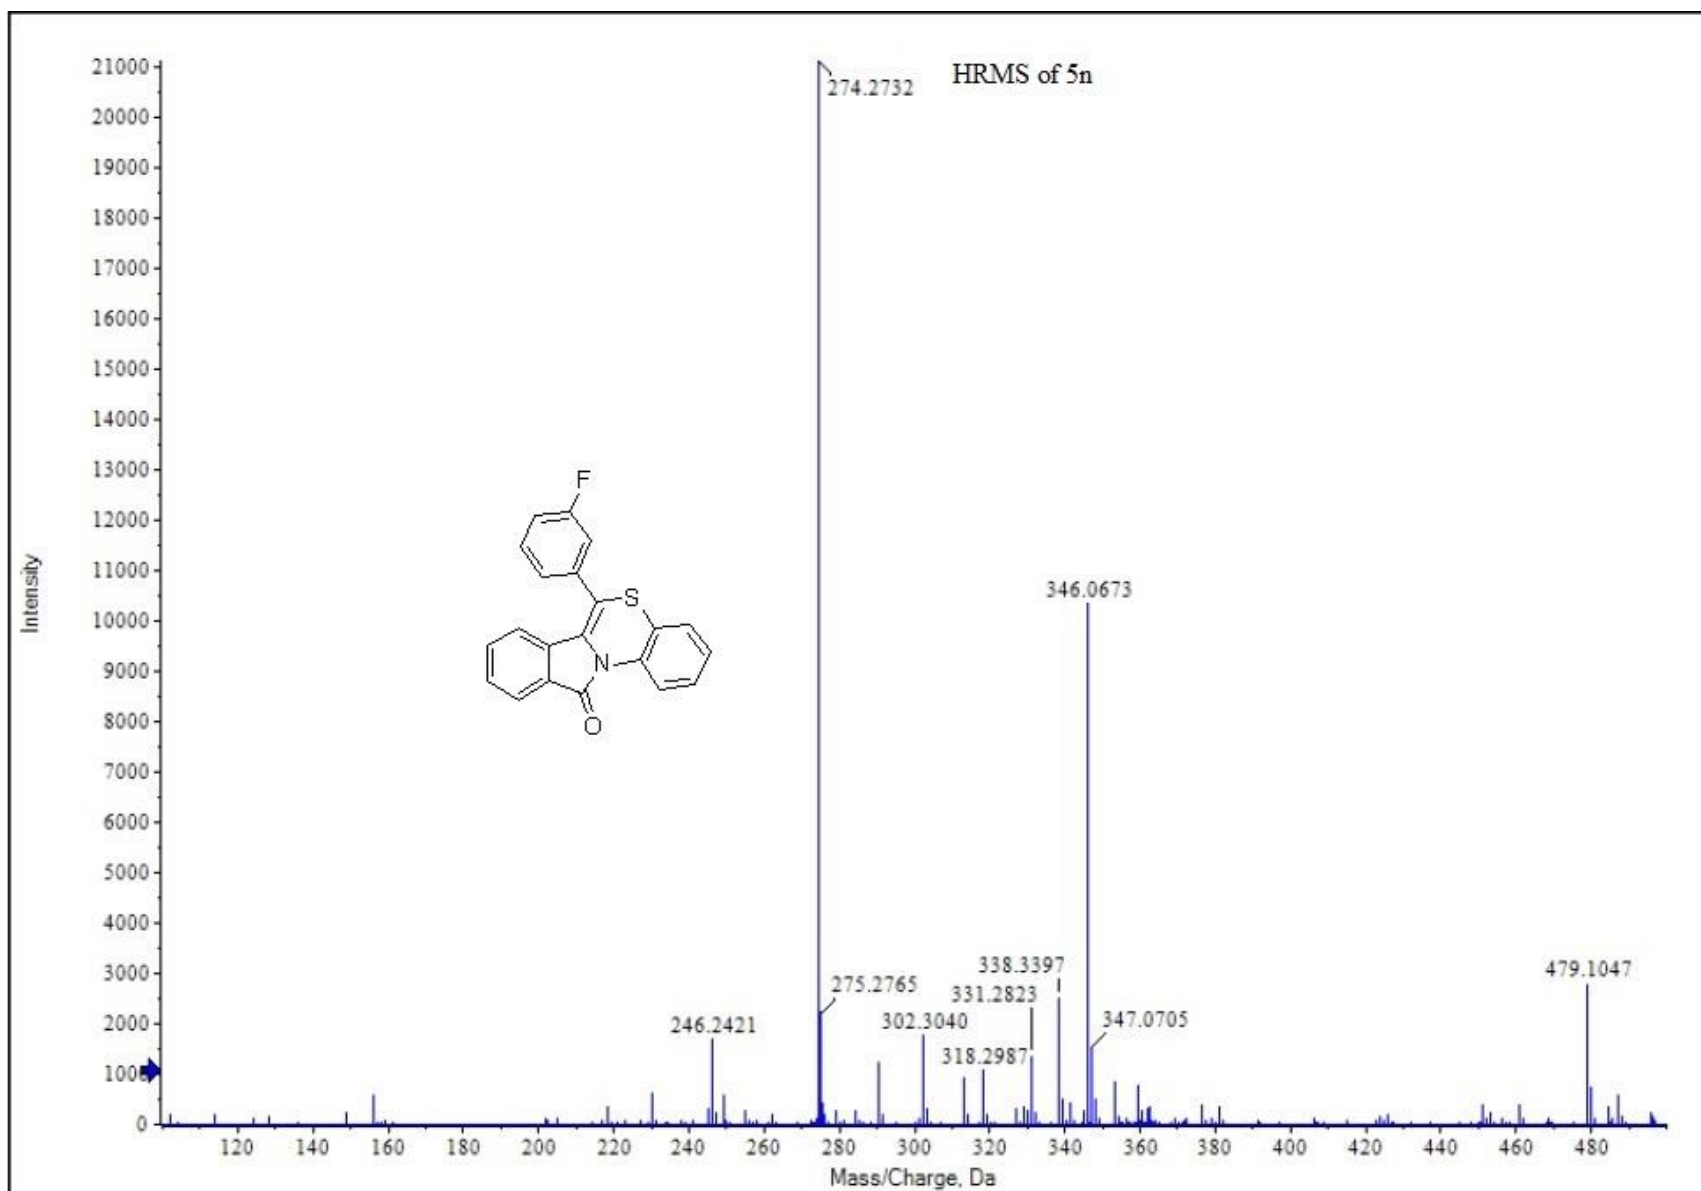

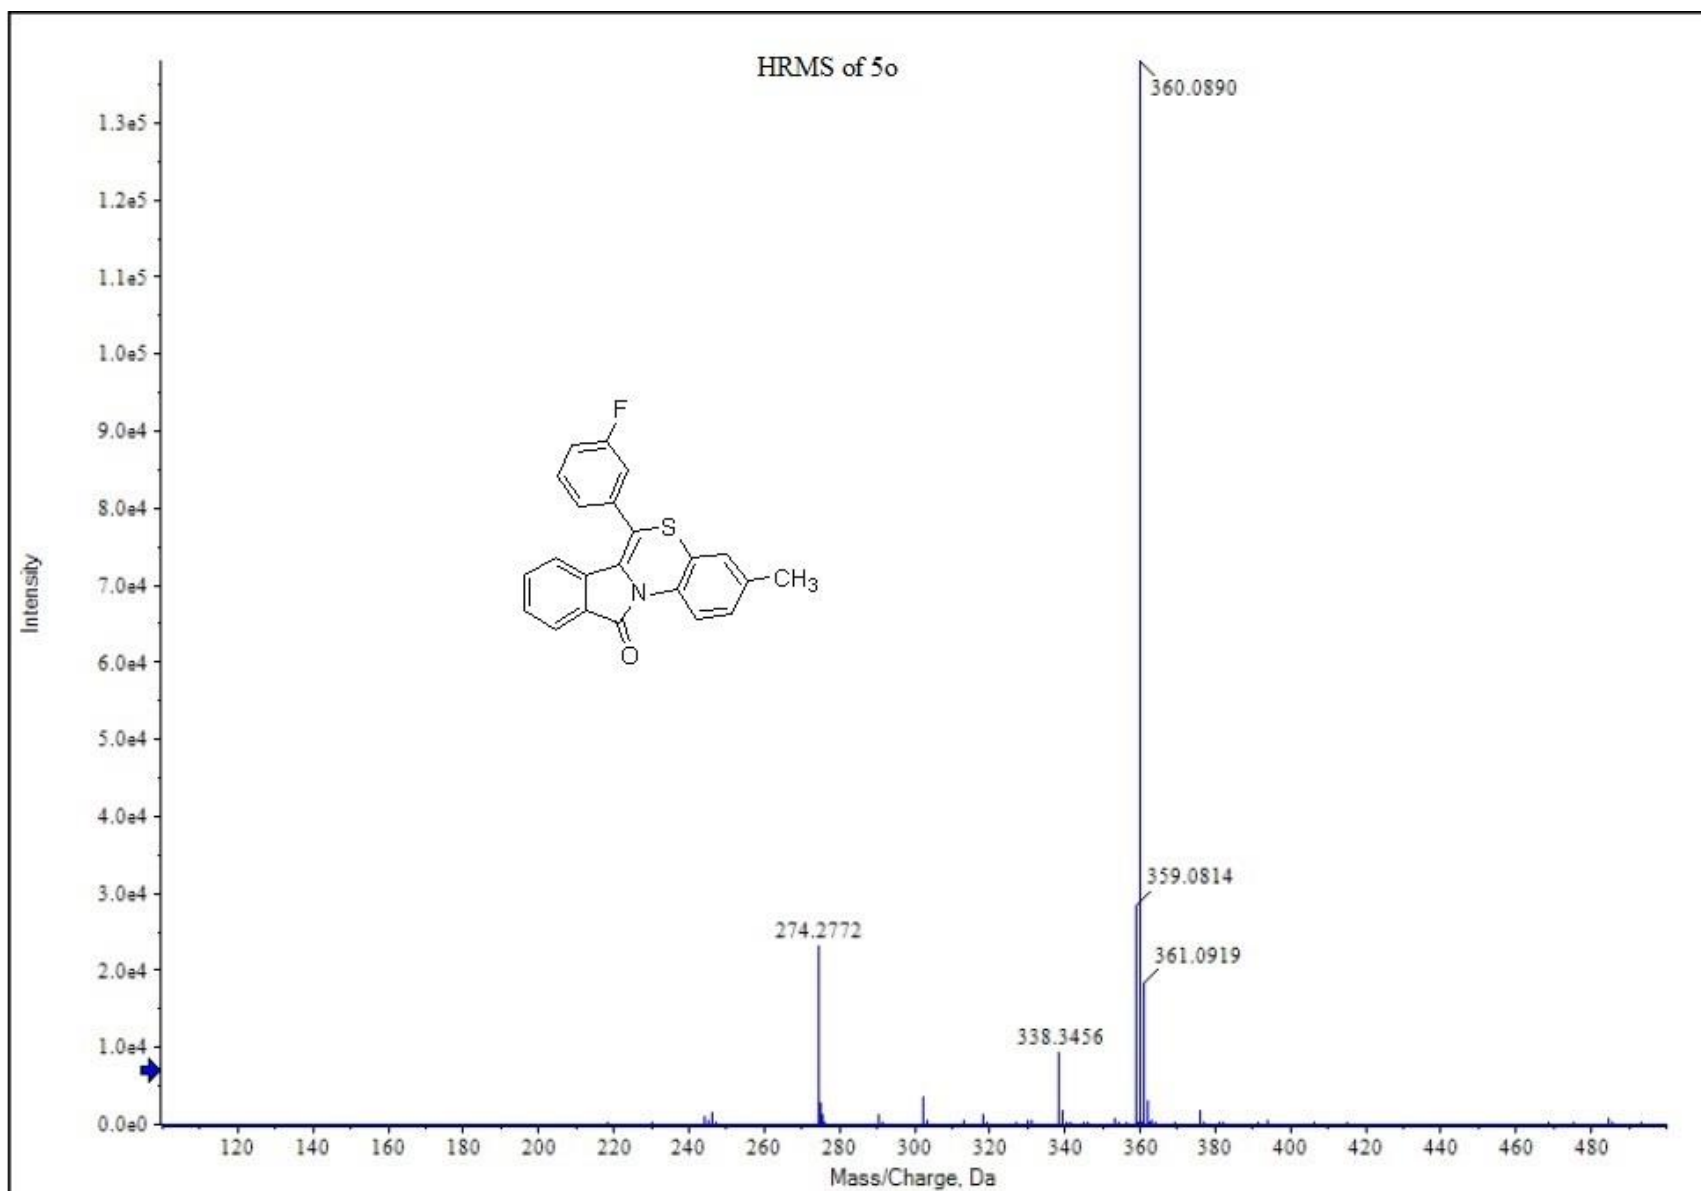

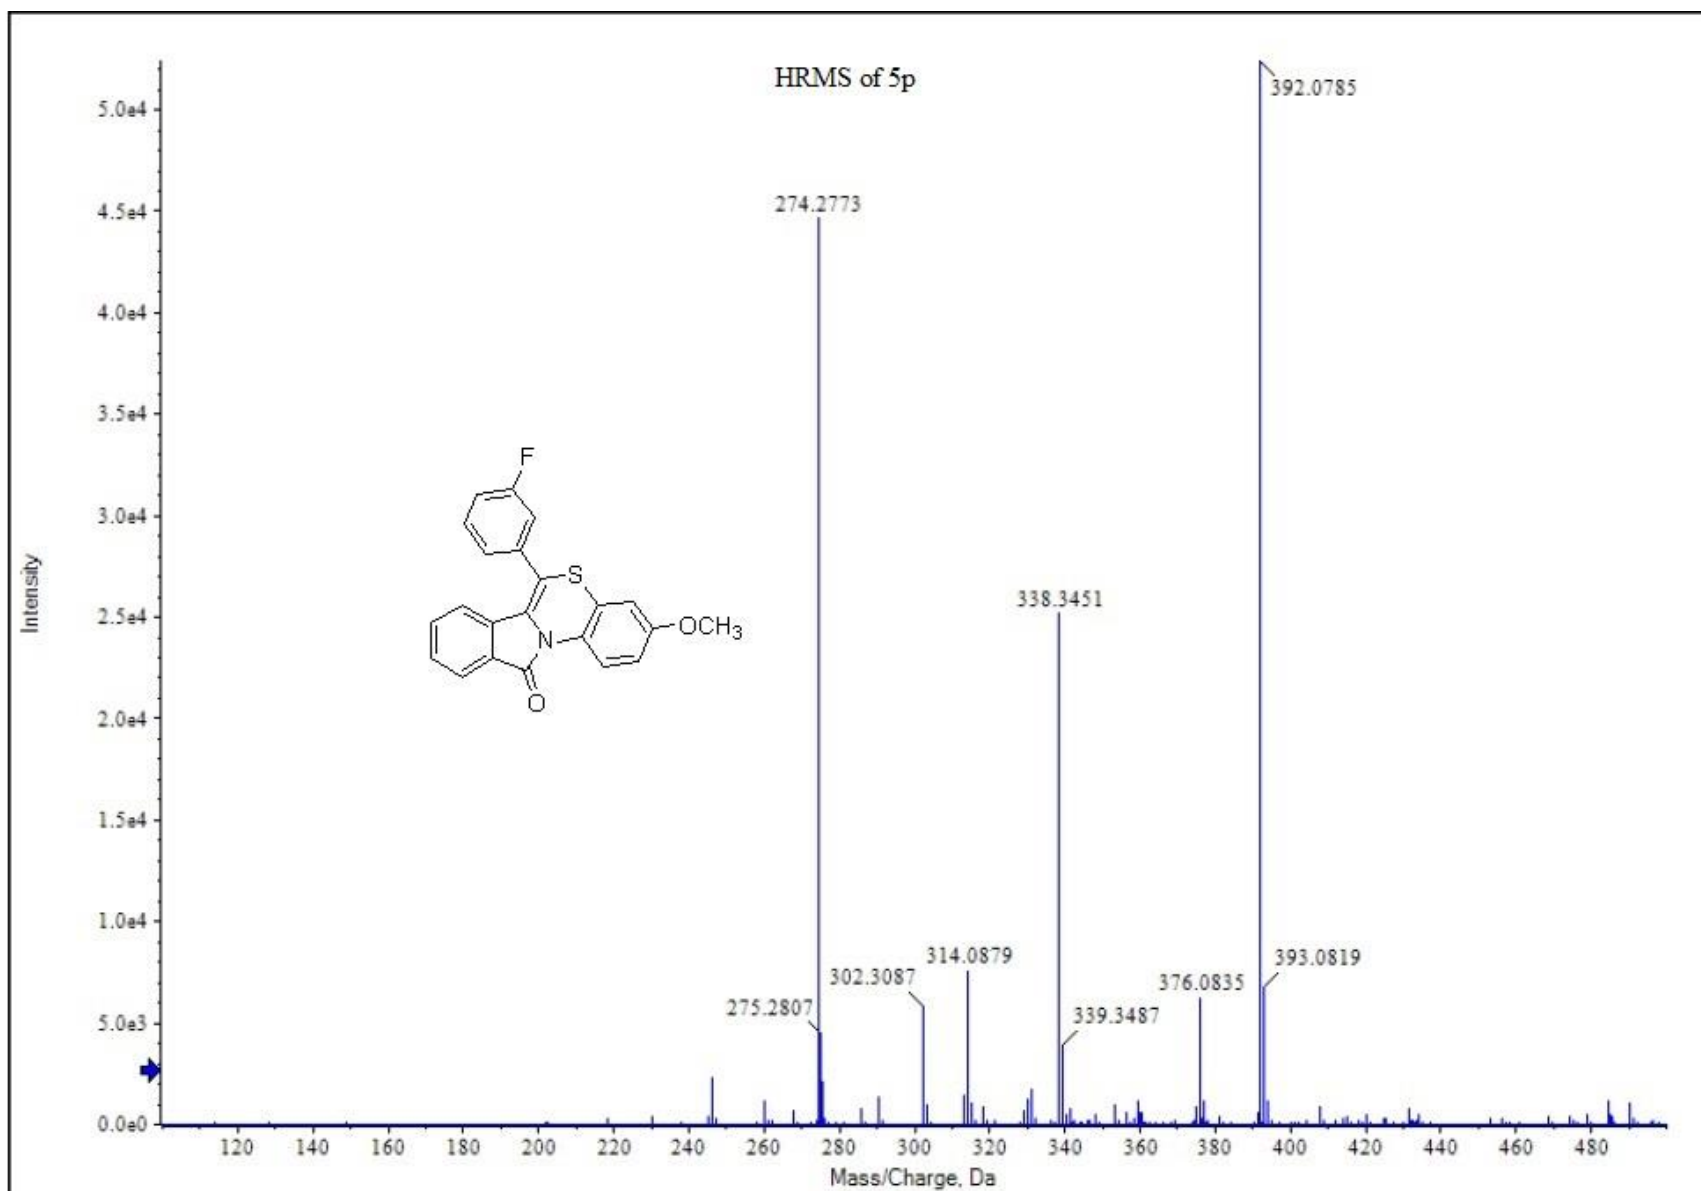

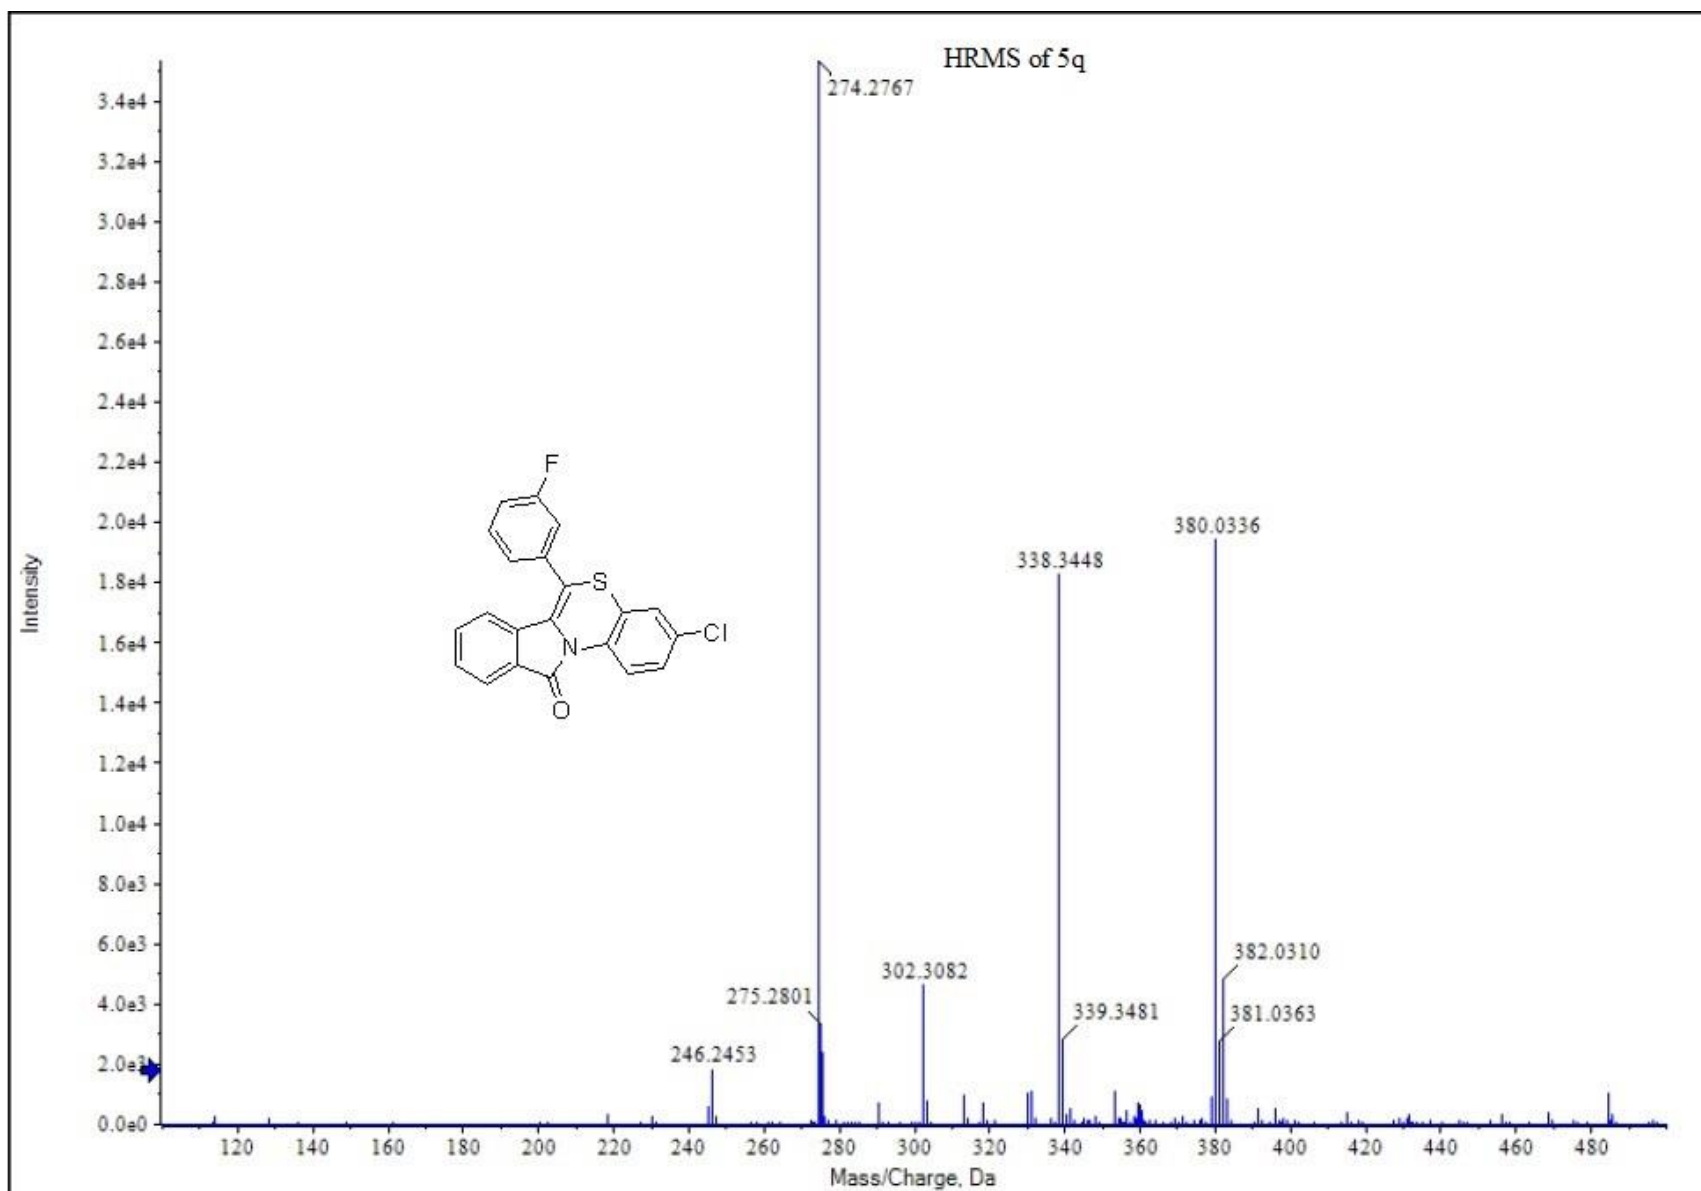



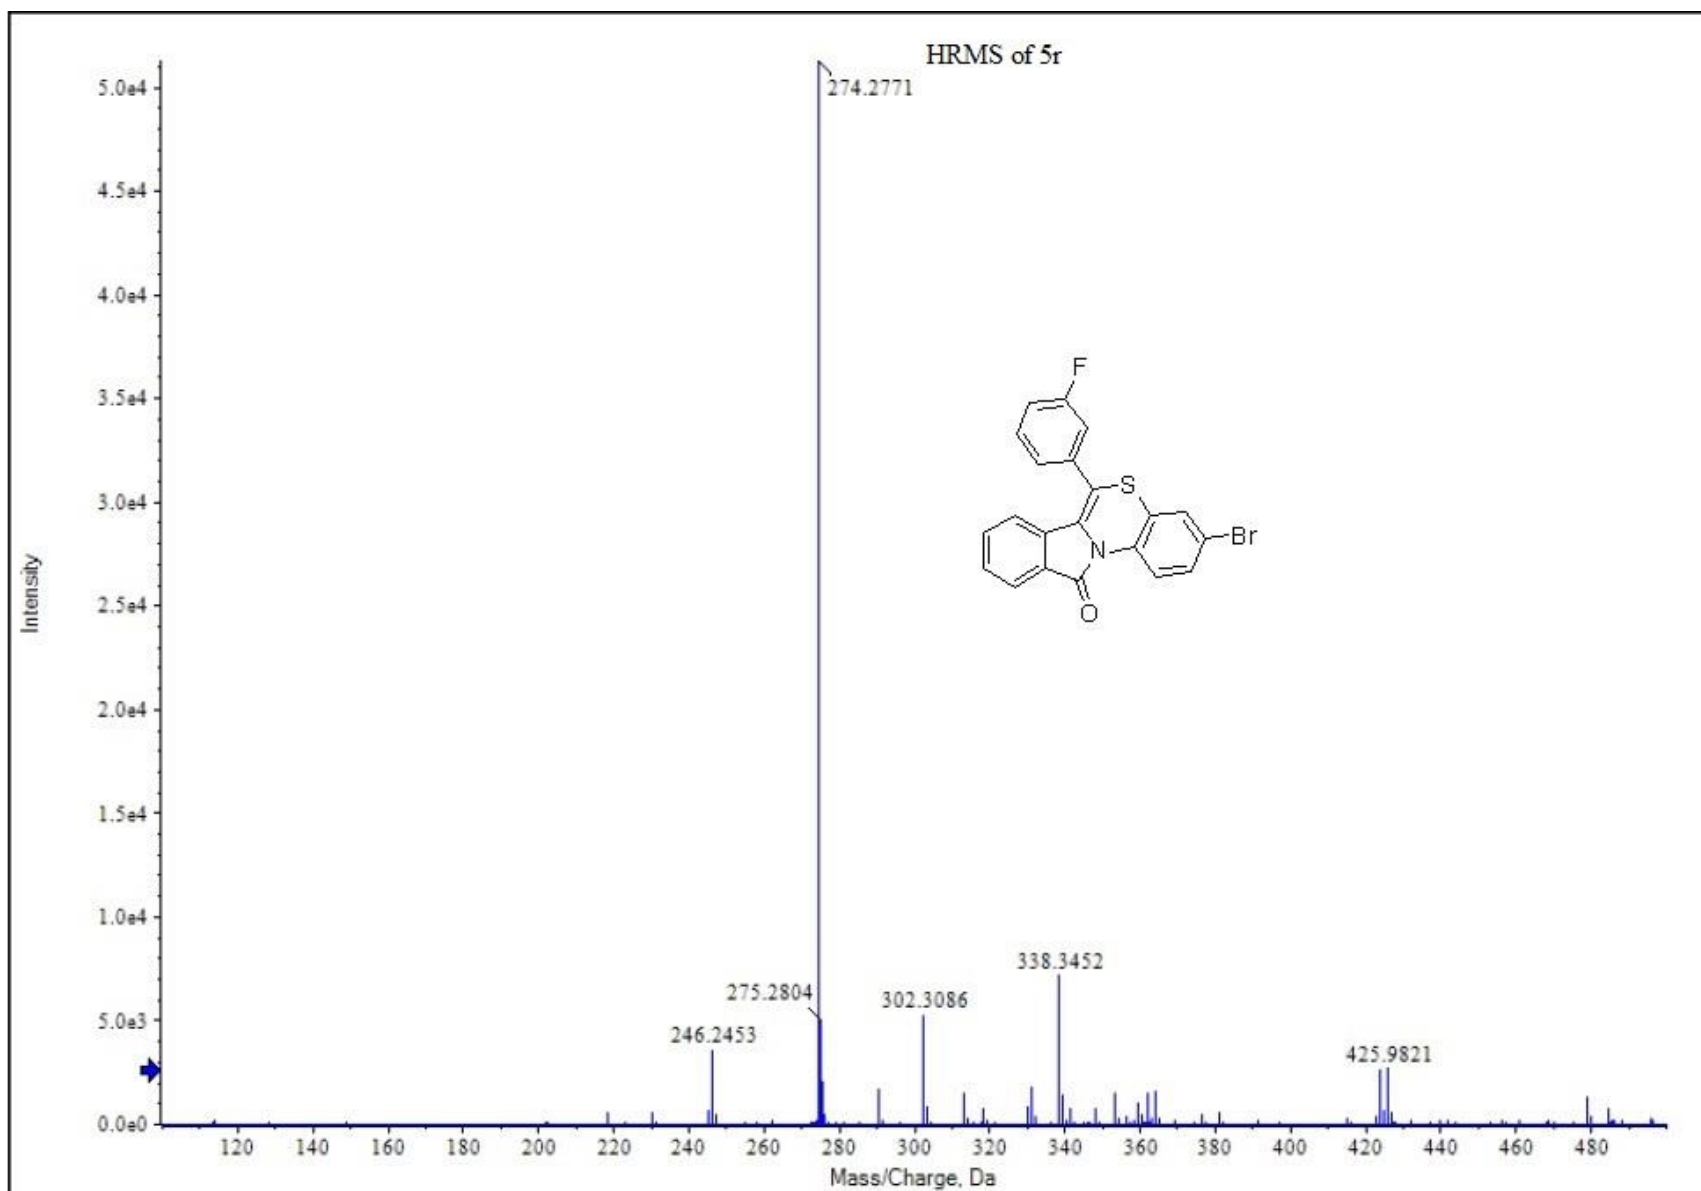

## Crystal data of 5b

**Table 3** Selected bond distances, bond angles and torsion angles of **5b** (standard uncertainties (s.u.) are given in parentheses)

| Bond         | Bond distance (Å) | Bond           | Bond distance (Å) |
|--------------|-------------------|----------------|-------------------|
| C3-C4        | 1.457(2)          | C6-C21         | 1.396(2)          |
| C3-C18       | 1.391(2)          | C6-S1          | 1.7521(17)        |
| C4-N1        | 1.434(2)          | C17-O2         | 1.221(2)          |
| C4-C5        | 1.343(2)          | C17-C18        | 1.462(3)          |
| C5-C10       | 1.492(2)          | C17-N1         | 1.398(2)          |
| C5-S1        | 1.7387(19)        | C21-N1         | 1.419(2)          |
| Bond         | Bond angle (°)    | Bond           | Bond angle (°)    |
| C2-C3-C4     | 133.10(16)        | C6-C21-N1      | 121.17(15)        |
| C2-C3-C18    | 119.21(17)        | C6-C21-C22     | 117.60(16)        |
| C3-C4-C5     | 129.25(16)        | C7-C6-C21      | 120.82(16)        |
| C3-C4-N1     | 106.36(14)        | C7-C6-S1       | 115.03(13)        |
| C3-C18-C17   | 109.65(15)        | C10-C5-S1      | 112.79(12)        |
| C3-C18-C19   | 122.46(18)        | C17-N1-C21     | 126.08(14)        |
| C4-C3-C18    | 107.67(15)        | C17-C18-C19    | 127.88(17)        |
| C4-N1-C17    | 110.37(14)        | C18-C17-N1     | 105.91(14)        |
| C4-C5-C10    | 123.73(16)        | C18-C17-O2     | 127.55(17)        |
| C4-C5-S1     | 123.46(14)        | C21-C6-S1      | 124.16(14)        |
| C4-N1-C21    | 123.55(14)        | C22-C21-N1     | 121.23(15)        |
| C5-S1-C6     | 103.01(9)         | N1-C17-O2      | 126.53(17)        |
| C5-C4-N1     | 124.34(16)        | O1-C8-C23      | 115.66(16)        |
| Bond         | Torsion angle (°) | Bond           | Torsion angle (°) |
| C2-C3-C4-C5  | -1.8(3)           | O2-C17-C18-C19 | -3.6(3)           |
| C3-C4-C5-S1  | -174.27(15)       | O2-C17-N1-C21  | 1.1(3)            |
| S1-C6-C7-C8  | 179.93(16)        | C22-C21-N1-C17 | -3.8(3)           |
| C3-C4-C5-C10 | 4.3(3)            | C22-C21-N1-C4  | 175.30(17)        |

**Table 4** X-ray crystallographic data of **5b**

|                                                          |                                                   |
|----------------------------------------------------------|---------------------------------------------------|
| Chemical formula                                         | C <sub>23</sub> H <sub>17</sub> NO <sub>2</sub> S |
| Formula weight                                           | 371.44                                            |
| Crystal system, Space group                              | Triclinic, P-1                                    |
| Temperature (K)                                          | 296(2)                                            |
| Radiation type, wavelength (Å)                           | Mo K $\alpha$ , 0.71073                           |
| <i>a</i> , <i>b</i> , <i>c</i> (Å)                       | 8.0068(7), 9.5362(10), 12.2550(9)                 |
| $\alpha$ , $\beta$ , $\gamma$ (°)                        | 95.494(3), 98.424(3), 97.562(4)                   |
| <i>V</i> (Å <sup>3</sup> )                               | 911.24(14)                                        |
| <i>Z</i>                                                 | 2                                                 |
| Density (calc) (Mg m <sup>-3</sup> )                     | 1.354                                             |
| <i>F</i> (000)                                           | 388                                               |
| $\mu$ (mm <sup>-1</sup> )                                | 0.196                                             |
| Crystal size (mm)                                        | 0.30 × 0.20 × 0.20                                |
| Completeness to $\theta = 28.34$                         | 89.9%                                             |
| $\theta_{\min}$ , $\theta_{\max}$ (°)                    | 2.60, 28.34                                       |
| Data collection                                          |                                                   |
| Measured reflections                                     | 7513                                              |
| Independent reflections                                  | 4092                                              |
| Reflections with $I > 2\sigma(I)$                        | 3077                                              |
| R <sub>int</sub>                                         | 0.0182                                            |
| Limiting indices (h, k, l)                               | -10→10; -11→12; -12→16                            |
| Absorption correction                                    | Multi-scan SADABS (Bruker, 1999)                  |
| <i>T</i> <sub>min</sub> , <i>T</i> <sub>max</sub>        | 0.9436, 0.9619                                    |
| Refinement                                               |                                                   |
| Refinement method                                        | Full-matrix least-squares on F <sup>2</sup>       |
| <i>R</i> [F <sup>2</sup> > 2 $\sigma$ (F <sup>2</sup> )] | 0.0470                                            |
| w <i>R</i> (F <sup>2</sup> )                             | 0.1305                                            |
| S(F <sup>2</sup> )                                       | 1.046                                             |

|                                                                 |               |
|-----------------------------------------------------------------|---------------|
| No. of reflections                                              | 4092          |
| No. of parameters                                               | 246           |
| No. of restraints                                               | 0.0           |
| Max. Shift, Av. Shift                                           | 0.024, 0.000  |
| $\Delta\rho_{\min}, \Delta\rho_{\max}$ ( $e \text{ \AA}^{-3}$ ) | -0.292, 0.230 |

---
